# A cell-free biosynthesis platform for modular construction of protein glycosylation pathways

Weston Kightlinger<sup>1,2</sup>, Katherine E. Duncker<sup>3</sup>, Ashvita Ramesh<sup>3</sup>, Ariel H. Thames<sup>4</sup>, Aravind Natarajan<sup>5</sup>, Allen Yang<sup>3</sup>, Jessica C. Stark<sup>1,2</sup>, Liang Lin<sup>2,3</sup>, Milan Mrksich<sup>1,2,3,6</sup>, Matthew P. DeLisa<sup>5,7,8</sup>, and Michael C. Jewett<sup>1,2\*</sup>

<sup>1</sup>Department of Chemical and Biological Engineering, Northwestern University, Evanston, Illinois, USA. <sup>2</sup>Center for Synthetic Biology, Northwestern University, Evanston, Illinois, USA. <sup>3</sup>Department of Biomedical Engineering, Northwestern University, Evanston, Illinois, USA. <sup>4</sup>Medical Scientist Training Program, Feinberg School of Medicine, Northwestern University, Chicago, Illinois, USA. <sup>5</sup>Department of Microbiology, Cornell University, Ithaca, New York, USA. <sup>6</sup>Department of Chemistry, Northwestern University, Evanston, Illinois, USA. <sup>7</sup>Robert Frederick Smith School of Chemical and Biomolecular Engineering, Cornell University, Ithaca, New York, USA. <sup>8</sup>Nancy E. and Peter C. Meinig School of Biomedical Engineering, Cornell University, Ithaca, NY 14853 USA.

\*Corresponding author:

Michael C. Jewett, 2145 Sheridan Road, Tech E-136, Evanston, IL 60208-3120;  
m-jewett@northwestern.edu; Tel: (+1) 847 467 5007; Fax: (+1) 847 491 3728

## Abstract

Glycosylation plays important roles in cellular function and endows protein therapeutics with beneficial properties. However, constructing biosynthetic pathways to study and engineer protein glycosylation remains a bottleneck. To address this limitation, we describe a modular, versatile cell-free platform for glycosylation pathway assembly by rapid *in vitro* mixing and expression (GlycoPRIME). In GlycoPRIME, crude cell lysates are enriched with glycosyltransferases by cell-free protein synthesis and then glycosylation pathways are assembled in a mix-and-match fashion to elaborate a single glucose priming handle installed by an *N*-linked glycosyltransferase. We demonstrate GlycoPRIME by constructing 37 putative protein glycosylation pathways, creating 23 unique glycan motifs. We then use selected pathways to design a one-pot cell-free system to synthesize a vaccine protein with an  $\alpha$ -galactose motif and engineered *Escherichia coli* strains to produce human antibody constant regions with minimal sialic acid motifs. We anticipate that our work will facilitate glycoscience and make possible new glycoengineering applications.

## Introduction

Glycosylation, the enzymatic process that attaches oligosaccharides to amino acid side chains in proteins, is one of the most abundant, complex, and important post-translational modifications found in nature<sup>1, 2</sup>. Glycosylation plays critical roles in human biology and disease<sup>1</sup>. It is also present in over 70% of approved or preclinical protein therapeutics<sup>3</sup>, having profound effects on stability<sup>4, 5</sup>, immunogenicity<sup>6, 7</sup>, and protein activity<sup>8</sup>. The importance of glycosylation and recent findings that the intentional manipulation of glycans can improve protein therapeutic properties<sup>4, 6, 8</sup> have motivated many efforts to study and engineer protein glycosylation structures<sup>9-12</sup>.

Unfortunately, the study of glycan functions in natural systems and the engineering of protein glycosylation structures for desired properties remain constrained by multiple factors. One constraint is that glycosylation structures are difficult to control within complex cellular environments because glycan biosynthesis is not template driven<sup>1, 13, 14</sup>. Glycans are synthesized by the coordinated activities of many glycosyltransferases (GTs) across several subcellular compartments<sup>1</sup>, leading to heterogeneity and complicating engineering efforts<sup>13-15</sup>. Another challenge is the shortage of methods for modular assembly of biosynthetic pathways to rapidly access a diversity of glycan structures. New cell lines must be developed to test each new glycosylation pathway<sup>11, 12</sup>, and essential biosynthetic pathways in eukaryotic organisms constrain the ability to modularly build synthetic pathways towards any user-defined glycosylation structure<sup>9, 16</sup>. Furthermore, the efficient and controlled conjugation of glycans onto proteins outside of natural systems remains challenging<sup>13, 15</sup>. A key issue for biochemical approaches is that many of the most important components of protein glycosylation pathways are associated with cellular membranes<sup>13</sup>. Most notably, the engineering of asparagine (*N*-linked) glycosylation has generally relied on the use of oligosaccharyltransferases (OSTs) to transfer prebuilt sugars from lipid-linked oligosaccharides (LLOs) onto proteins as they are transported across membranes. OSTs are integral membrane proteins that often contain multiple subunits<sup>17</sup> and LLOs are difficult to synthesize and manipulate *in vitro*<sup>13</sup>. Despite recent advances enabling the production, characterization, and use of OSTs in cell-free systems<sup>18-20</sup>, the complexity of these membrane-associated components still presents a major barrier for glycoengineering and the facile construction of multienzyme glycosylation pathways *in vitro*<sup>13, 15</sup>.

A recently discovered class of cytoplasmic, bacterial enzymes known as *N*-linked glycosyltransferases (NGTs), may overcome these limitations by enabling the construction of simplified, fully soluble glycosylation systems in prokaryotic hosts (*e.g.*, *Escherichia coli*)<sup>9, 21-23</sup>. NGTs efficiently install a glucose residue onto asparagine side-chains within proteins using a uracil-diphosphate-glucose (UDP-Glc) sugar donor<sup>24</sup>. Importantly, NGTs are soluble enzymes that can be easily expressed functionally in the *E. coli* cytoplasm<sup>22, 25, 26</sup>. Because glycosylation systems using NGT for glycan-protein conjugation do not require protein transport across membranes or lipid-associated components, they have elicited great interest from the glycoengineering community for the production of recombinant protein therapeutics and vaccines<sup>9, 21, 22, 26-29</sup>. Several recent advances set the stage for this vision. First, the acceptor specificity of NGTs has been extensively studied using peptide and protein substrates<sup>25, 28</sup>, glycoproteomic studies<sup>25</sup>, and the GlycoSCORES technique<sup>26</sup>. These studies revealed that NGTs modify *N*-X-S/T amino acid acceptor motifs resembling those in eukaryotic glycoproteins. Second, the NGT from *Actinobacillus pleuropneumoniae* (ApNGT) has been shown to modify both native and rationally designed glycosylation sites within eukaryotic proteins and peptides *in vitro* and in the *E. coli* cytoplasm<sup>21, 22, 25, 26</sup>. Third, the Aebi group recently reported a biosynthetic method in *E. coli* cells for elaborating the *N*-linked glucose installed by ApNGT to a polysialic acid motif, which may prolong the serum-half-life of small proteins<sup>21</sup>. Chemoenzymatic methods to transfer pre-built, oxazoline-functionalized oligosaccharides onto the ApNGT-installed glucose residue have also been reported<sup>27, 29</sup>. However, other biosynthetic pathways to build therapeutically

relevant glycans using NGTs have not been explored<sup>9</sup>, leaving much of the vast theoretical utility of this enzyme class for biocatalysis inaccessible. Unfortunately, current techniques for building and testing glycosylation systems remain time-consuming because they require the synthesis of new genetic constructs, cellular transformation and expression, and recovery and analysis of glycoproteins from living cells to test each biosynthetic pathway<sup>11, 12</sup>.

One promising alternative to bypass current technical bottlenecks is the use of cell-free systems in which the production of proteins and metabolites occurs *in vitro* without using intact, living cells<sup>30, 31</sup>. Complementing efforts in cellular engineering, *E. coli*-based cell-free protein synthesis (CFPS) systems can achieve gram per liter titers of diverse proteins in hours<sup>30, 32</sup> and have been shown to enable the rapid discovery, prototyping, and optimization of biosynthetic pathways without the need to reengineer an organism for each pathway iteration<sup>31, 33, 34</sup>. By shifting the design-build-test unit from a genetic construct to a lysate, this approach allows for the construction of glycosylation pathways in hours<sup>18-20, 26</sup>. We recently reported the development of a one-pot cell-free glycoprotein synthesis (CFGpS) system to synthesize glycoproteins *in vitro* by overexpressing glycan biosynthesis pathways and OSTs in the *E. coli* chassis strain before lysis<sup>18</sup>. This CFGpS technique represents a significant simplification of cell-based methods and enables the production of glycoproteins with a range of relevant glycans at higher conversions than those reported *in vivo*<sup>16, 18</sup>. However, because our previous work required the construction and expression of glycan biosynthesis operons in living cells, it was not well suited for the rapid discovery and testing of multienzyme glycosylation pathways *in vitro*.

Here, we describe the development of a modular, cell-free method for glycosylation pathway assembly by rapid *in vitro* mixing and expression (GlycoPRIME) to construct new biosynthetic pathways for making glycoproteins. In this method, crude *E. coli* lysates are selectively enriched with individual GTs by CFPS and then combined in a mix-and-match fashion to construct and analyze multienzyme glycosylation pathways that can then be translated to biomanufacturing platforms (**Fig. 1**). A key feature of GlycoPRIME is the use of ApNGT to site-specifically install a single *N*-linked glucose primer onto proteins, which can then be elaborated to a diverse repertoire of glycans. To validate GlycoPRIME, we optimized the *in vitro* expression of 24 bacterial and eukaryotic GTs using CFPS and characterized their activity on a model glycoprotein substrate containing an acceptor sequence which can be efficiently glycosylated by ApNGT. We then combined these GTs *in vitro* to create 37 biosynthetic pathways, yielding 23 unique glycan structures composed of between 1-5 core saccharide motifs and longer repeating structures. These glycosylation pathways provide new biosynthetic routes to several useful structures such as an  $\alpha$ 1-3-linked galactose ( $\alpha$ Gal) epitope, sialylated glycans, as well as fucosylated and sialylated forms of lactose or poly-*N*-acetylactosamine (LacNAc) without the need for cellular membranes or membrane-bound components. We demonstrated the utility of GlycoPRIME to inform the design of biosynthetic pathways by synthesizing a protein vaccine candidate with an  $\alpha$ Gal glycan known to have immunostimulatory properties<sup>6, 7, 35</sup> in a one-pot CFGpS reaction and the constant region (Fc) of the human immunoglobulin (IgG1) antibody with minimal sialic acid glycan motifs known to modulate protein therapeutic properties<sup>5, 36</sup> in the *E. coli* cytoplasm. We anticipate that the specific pathways discovered in this study as well as the GlycoPRIME method will provide new opportunities to produce diverse glycoproteins for basic research and biotechnological applications.

## Results

### Establishing an *in vitro* glycosylation pathway engineering platform

To develop GlycoPRIME, we selected ApNGT to install a single *N*-linked glucose priming residue onto a model target protein. The glucose primer could then be elaborated using a modular,

multiplexed framework of *in vitro* glycosylation (IVG) reactions to build a diversity of glycosylation motifs (Fig. 1). Our vision was to show the versatility of this platform by developing biosynthetic routes to distinct glycoprotein structures including sialylated and fucosylated lactose and LacNAc glycans as well as an  $\alpha$ Gal epitope.

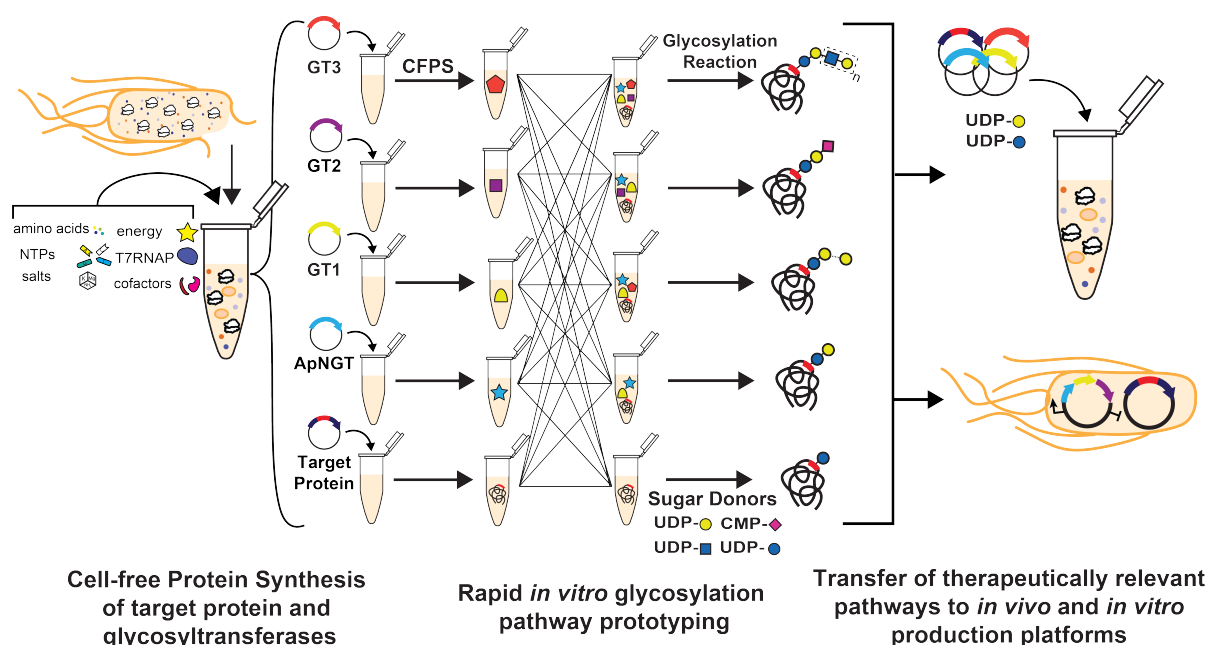

**Figure 1: A method for glycosylation pathway assembly by rapid *in vitro* mixing and expression (GlycoPRIME).** GlycoPRIME was established to identify biosynthetic pathways for the construction of diverse N-linked glycans. Crude *E. coli* lysates enriched with a target protein or individual glycosyltransferases (GTs) by cell-free protein synthesis (CFPS) were mixed in various combinations to identify biosynthetic pathways for the construction of diverse N-linked glycans. A model acceptor protein (Im7-6), the N-linked glycosyltransferase from *A. pleuropneumoniae* (ApNGT), and 24 elaborating GTs were produced in CFPS and then assembled with activated sugar donors to identify 23 biosynthetic pathways producing unique glycosylation structures, several with therapeutic relevance. Pathways discovered *in vitro* were transferred to a one-pot glycoprotein synthesis (CFGP) system or living *E. coli* to produce therapeutically relevant glycoproteins.

For proof of concept, we set out to glycosylate a model protein with ApNGT in a setting that would enable our GlycoPRIME workflow. Namely, we needed to identify CFPS conditions that provided high GT expression titers so that the minimum volume of GT-enriched lysate required for complete conversion could be added to each IVG reaction, leaving sufficient reaction volume and generating the substrate for further elaboration by assembly of cell-free lysates. Based on our previous optimization of the ApNGT acceptor sequence<sup>26</sup>, we selected an engineered version of the *E. coli* immunity protein Im7 (Im7-6) bearing a single, optimized glycosylation acceptor sequence of GGNWTT at an internal loop as our model target protein (**Supplementary Table 1** and **Supplementary Note 1**). We used [<sup>14</sup>C]-leucine incorporation to measure and optimize the CFPS reaction temperature for our engineered Im7-6 target and ApNGT (**Supplementary Table 2** and **Fig. 2a**). We found that 23°C provided the optimum amount of soluble product in the trade-off between greater overall protein production at higher temperatures and higher solubility at lower temperatures. We synthesized Im7-6 and ApNGT in CFPS reactions for 20 h and then mixed those protein-enriched crude lysate products together along with 2.5 mM UDP-Glc in a 32- $\mu$ l IVG reaction and incubated for 20 h at 30°C. We then purified the Im7-6 substrate by affinity purification with Ni-NTA functionalized magnetic beads and performed intact glycoprotein liquid

chromatography mass spectrometry (LC-MS) analysis (see **Methods**). We observed the nearly complete conversion of 10  $\mu$ M of Im7-6 substrate (11  $\mu$ l) with just 0.4  $\mu$ M ApNGT (1  $\mu$ l) (**Fig. 2c**), as indicated by a mass shift of 162 Da (the mass of a glucose residue) in the deconvoluted protein mass spectra (theoretical masses shown in **Supplementary Table 3**). This finding demonstrates that crude lysates enriched by CFPS can be used to assemble IVG reactions without purification and with enough remaining reaction volume to allow for the addition of elaborating GTs.

We next identified a set of 7 GTs with previously characterized activities that could be useful in elaborating the glucose primer installed by ApNGT to relevant glycans (**Fig. 2** and **Supplementary Table 4**). Previous works indicate that the glucose installed by ApNGT is modified in its native host by the polymerizing Ap $\alpha$ 1-6 glucosyltransferase to form *N*-linked dextran<sup>24</sup> and that this structure could be useful as a vaccine antigen<sup>22</sup>. The  $\beta$ 1-4 galactosyltransferase LgtB from *Niesseria meningitis* was also shown to form an *N*-linked lactose (Asn-Glc $\beta$ 1-4Gal) in the previously described synthesis of polysialic acid<sup>21</sup>. Here, we tested whether these pathways could be recapitulated *in vitro* and selected 5 additional enzymes with potentially useful activities (**Fig. 2a**). We chose the *N*-acetylgalactosamine (GalNAc) transferase from *Bacteroides fragilis* (BfGalNAcT) because the GalNAc residue it installs<sup>37</sup> which could serve as a potential elaboration point for *O*-linked glycan epitope mimics. We also chose a variety of  $\beta$ 1-4 galactosyltransferases from *Streptococcus pneumoniae* (SpWchK), *Niesseria gonorrhoeae* (NgLgtB), *Helicobacter pylori* (Hp $\beta$ 4GalT), and *Bos taurus* (Bt $\beta$ 4GalT1) with similar activities to NmLgtB in order to determine the best biosynthetic route to an *N*-linked lactose structure. This *N*-linked lactose is a critical reaction node for further diversification of the *N*-linked glycan because lactose is a known substrate of a wide variety of GTs that modify milk oligosaccharides and the termini of human *N*-linked glycans<sup>1, 38-41</sup>.

We optimized the *in vitro* expression conditions of these 7 GTs (**Fig. 2** and **Supplementary Table 2**), as well as SpWchJ from *S. pneumoniae*, which is known to enhance the activity of SpWchK. We then assembled IVG reactions by mixing CFPS reaction products containing these GTs with Im7-6 and ApNGT CFPS products as well as UDP-Glc and other appropriate sugar donors according to previously characterized activities (**Fig. 2**). We observed mass shifts of intact Im7-6 and tandem MS (MS/MS) fragmentation spectra of trypsinized glycopeptides consistent with the previously characterized activities of NmLgtB, NgLgtB, BfGalNAcT, and Ap $\alpha$ 1-6 which are known to install  $\beta$ 1-4Gal,  $\beta$ 1-4Gal,  $\beta$ 1-3GalNAc, and an  $\alpha$ 1-6 dextran polymer, respectively (**Fig. 2**, **Supplementary Fig. 1**, and **Supplementary Table 5**). We did not observe modification by Hp $\beta$ 4GalT, SpWchK (even in the presence of SpWchJ), or Bt $\beta$ 4GalT1 (even in the presence  $\alpha$ -lactalbumin and conditions conducive to disulfide bond formation) (**Supplementary Fig. 2**). Because NmLgtB and NgLgtB have identical activities, we monitored the resulting glycosylation profile with decreasing amounts of enzyme to find the preferred homolog for *N*-linked lactose synthesis. We found that NmLgtB had greater specific activity than NgLgtB and could achieve nearly complete conversion with 2  $\mu$ M NmLgtB (**Supplementary Fig. 3**). These results show that multienzyme glycosylation pathways can be rapidly synthesized, assembled, and evaluated in a multiplexed fashion *in vitro*. Using this approach, we found that ApNGT and NmLgtB provide an efficient *in vitro* route to *N*-linked lactose and discovered that ApNGT and BfGalNAcT can site-specifically install a GalNAc-terminated glycan.

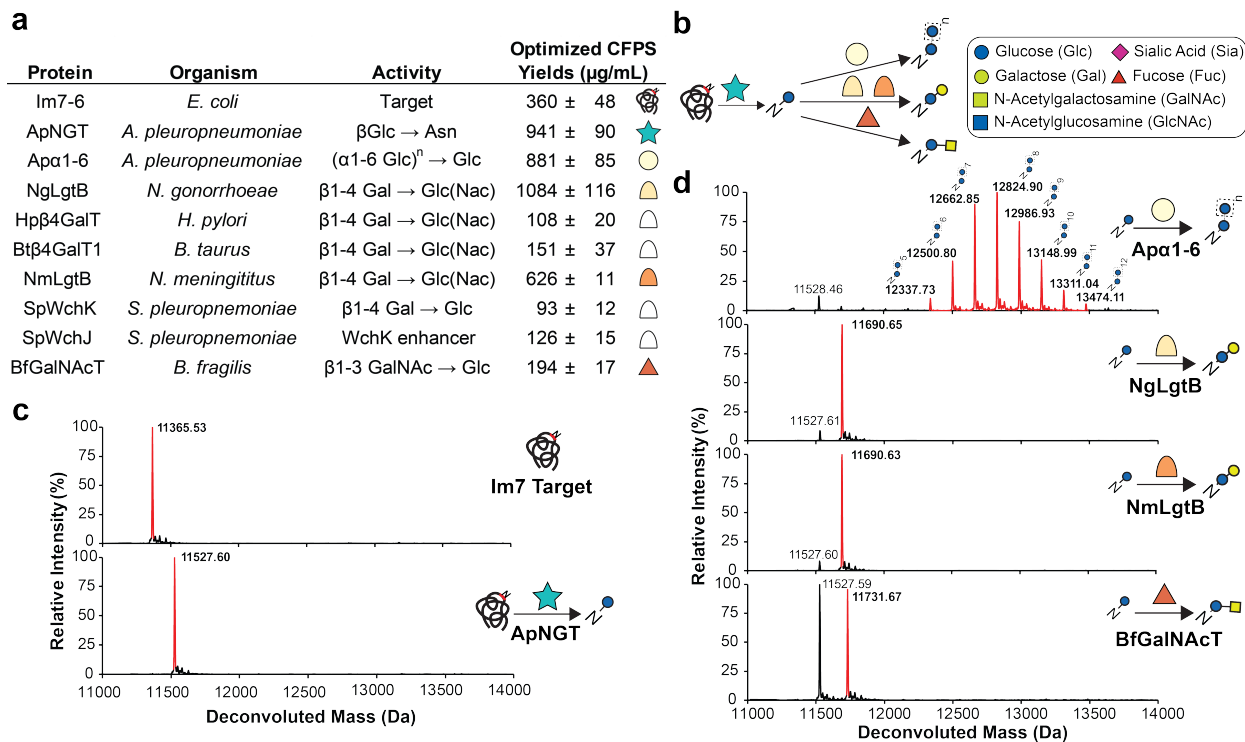

**Figure 2: *In vitro* synthesis and assembly of one- and two-enzyme glycosylation pathways.** (a) Protein name, species, previously characterized activity and optimized soluble CFPS yields for Im7-6 target protein, ApNGT, and GTs selected for glycan elaboration. References for previously characterized activities in **Supplementary Table 4**. CFPS yields and errors indicate mean and standard deviation (S.D.) from  $n=3$  CFPS reactions quantified by [ $^{14}\text{C}$ ]-leucine incorporation. Full CFPS expression data in **Supplementary Table 2**. (b) Monosaccharide symbol key and *in vitro* glycosylation (IVG) reaction scheme for *N*-linked glucose installation on Im7-6 by ApNGT and elaboration by selected GTs. All glycan structures in this article use Symbol Nomenclature for Glycans (SNFG) and Oxford System conventions for linkages. All mentions of sialic acid refer to *N*-acetylneuraminic acid. (c) Deconvoluted mass spectrometry spectra from Im7-6 protein purified from *in vitro* glycosylation (IVG) reactions assembled from CFPS reaction products with and without 0.4  $\mu\text{M}$  ApNGT as well as 2.5 UDP-Glc. Full conversion to *N*-linked glucose was observed after IVG incubation for 24 h at 30°C. (d) Intact deconvoluted MS spectra from Im7 protein purified from IVG reactions assembled from CFPS reaction products with 10  $\mu\text{M}$  Im7-6, 0.4  $\mu\text{M}$  ApNGT, and 7.8  $\mu\text{M}$  NmLgtB, 13.9  $\mu\text{M}$  NgLgtB, 3.1  $\mu\text{M}$  BfGalNAcT, or 9.4  $\mu\text{M}$  Ap $\alpha$ 1-6. IVG reactions were supplemented with 2.5 mM UDP-Glc as well as 2.5 mM UDP-Gal or 5 mM UDP-GalNAc as appropriate for 24 h at 30°C. Observed mass shifts and MS/MS fragmentation spectra (**Supplementary Fig. 1**) are consistent with efficient modification of *N*-linked glucose with  $\beta 1-4\text{Gal}$ ;  $\beta 1-4\text{Gal}$ ;  $\beta 1-3\text{GalNAc}$ ; and  $\alpha 1-6$  dextran polymer. Theoretical protein masses found in **Supplementary Table 3**. Spectra from Hp $\beta$ 4GalT, Bt $\beta$ 4GalT1, and SpWchJ+K, which did not modify the *N*-linked glucose installed by ApNGT are shown in **Supplementary Fig. 2**. All IVG reactions contained 10  $\mu\text{M}$  Im7 and were incubated for 20 h with 2.5 mM of each appropriate nucleotide-activated sugar donor as indicated above. All spectra were acquired from full elution peak areas of all detected glycosylated and aglycosylated Im7-6 species and are representative of  $n=3$  independent IVGs. Spectra from  $m/z$  100-2000 were deconvoluted into 11,000-14,000 Da using Compass Data Analysis maximum entropy method.

## Modular construction of diverse glycosylation pathways

To demonstrate the power of GlycoPRIME for modular pathway construction, we next selected 15 GTs with previously characterized activities that may be able to elaborate the *N*-linked lactose structure installed by ApNGT and NmLgtB into a diverse repertoire of 3-5 saccharide motifs and longer repeating structures (Fig. 3 and Supplementary Table 4). Specifically, we targeted structures terminated in sialic acid (Sia) and galactose residues as well as fucosylated and sialylated forms of lactose and LacNAc. We first describe our rationale for selecting these pathway classes and then present our experimental results.

We aimed to construct glycans terminated in sialic acids because such structures are known to effectively modulate the trafficking, stability, and pharmacodynamics of glycoprotein therapeutics<sup>5, 8, 21, 36, 42</sup>. As the linkage details of terminal sialic acids are also important<sup>5</sup>, we selected enzymes to install Sia with  $\alpha$ 2-3,  $\alpha$ 2-6, and  $\alpha$ 2-8 linkages onto the *N*-linked lactose. To start, we chose to build a 3'-sialyllactose (Glc $\beta$ 1-4Gal $\alpha$ 2-6Sia) structure. This structure could provide several useful properties including mimicry of the GM3 ganglioside (ceramide-Glc $\beta$ 1-4Gal $\alpha$ 2-6Sia) for vaccines against cancer cells<sup>43</sup>. The 3'-sialyllactose structure may also mimic the recently reported GlycoDelete structure (GlcNAc $\beta$ 1-4Gal $\alpha$ 2-3Sia) which has been shown to simplify the glycosylation patterns of granulocyte-macrophage colony-stimulating factor (GM-CSF) and IgG therapeutics while preserving their activities and *in vivo* circulation times<sup>44</sup>. To build 3'-sialyllactose, we chose four  $\alpha$ 2-3 sialyltransferases from *Pasteurella multocida* (PmST3,6), *Vibrio sp JT-FAJ-16* (VsST3), *Photobacterium phosphoreum* (PpST3), and *Campylobacter jejuni* (CjCST-I). Next, we aimed to produce 6'-sialyllactose (Glc $\beta$ 1-4Gal $\alpha$ 2-6Sia) structure because *N*-glycans bearing terminal  $\alpha$ 2-6Sia are common in secreted human proteins<sup>12</sup>, have exhibited anti-inflammatory properties<sup>8</sup>, and would provide distinct siglec, lectin, and receptor binding profiles<sup>5</sup>. To produce 6'-sialyllactose we selected three  $\alpha$ 2-6 sialyltransferases from humans (HsSIAT1), *Photobacterium damsela* (PdST6), and *Photobacterium leiognathid* (PIST6). Finally, we investigated the *in vitro* production of glycans with  $\alpha$ 2-8Sia that may mimic the GD3 ganglioside (ceramide-Glc $\beta$ 1-4Gal $\alpha$ 2-3Sia $\alpha$ 2-8Sia), a possible vaccine epitope against human melanoma cells<sup>45, 46</sup>. Based on previous works that used CjCST-II to construct polysialic acids<sup>21, 42</sup>, we selected the CST-II bifunctional sialyltransferase from *C. jejuni* to install terminal  $\alpha$ 2-8Sia. In addition to these sialyltransferases, we also explored the synthesis of glycans terminated with pyruvate moieties because these structures display similar lectin-binding properties to sialic acids<sup>47</sup>. For this purpose, we selected a recently discovered pyruvyltransferase from *Schizosaccharomyces pombe* (SpPvg1)<sup>47</sup>.

Beyond structures terminated in sialic acids, we also explored pathways that could modify *N*-linked lactose with galactose, fucose (Fuc), and LacNAc motifs. For example, we aimed to engineer a first-of-its-kind bacterial system for complete biosynthesis of proteins modified with  $\alpha$ Gal (Glc $\beta$ 1-4Gal $\alpha$ 1-3Gal) epitopes.  $\alpha$ Gal is an effective self:non-self discrimination epitope in humans and an estimated 1% of the human IgG pool reacts with this motif<sup>6, 7, 35, 48</sup>. As such,  $\alpha$ Gal has been shown to confer adjuvant properties when associated with various peptide, protein, whole-cell, and nanoparticle-based immunogens<sup>6, 7, 35, 48-50</sup>. To build the desired  $\alpha$ Gal pathway, we selected the  $\alpha$ 1,3 galactosyltransferase from *B. taurus* (BtGGTA). We also selected the globobiose structure (Glc $\beta$ 1-4Gal $\alpha$ 1-4Gal), which mimics the Gb3 ganglioside (ceramide-Glc $\beta$ 1-4Gal $\alpha$ 1-4Gal) used for the detection<sup>51, 52</sup> and removal<sup>53</sup> of *Shigella* toxins that are secreted by pathogenic bacteria and preferentially bind to Gb3<sup>53</sup>. We selected the galactosyltransferase LgtC from *N. meningitis* (NmLgtC) to synthesize this structure. An additional pathway class we sought to build were LacNAc polymers, which regulate cell-cell interactions in humans and are often found on aggressive cancer cells<sup>54</sup>. We chose to test two  $\beta$ 1-3 *N*-acetylglucosamine (GlcNAc) transferases from *N. gonorrhoeae* (NgLgtA) and *Haemophilus ducreyi* (HdGlcNAcT) for their ability to make this structure. Finally, we aimed to build fucosylated lactose and LacNAc structures (which may find applications in mimicking properties of Lewis antigens and Helminth immunomodulatory glycans<sup>55</sup>) by testing  $\alpha$ 1,3 and  $\alpha$ 1,2 fucosyltransferases from *H. pylori* (HpFutA and HpFutC, respectively). In total, we sought to build 9 oligosaccharide structures by elaborating the *N*-linked lactose installed by ApNGT and NmLgtB.

Following our pathway design and GT selection, we used GlycoPRIME to synthesize and assemble three enzyme biosynthetic pathways containing ApNGT, NmLgtB, and each of the 15 GTs described above. We optimized the expression of each GT in CFPS (**Figure 3a and Supplementary Table 2**) and assembled IVG reactions by combining crude lysates containing



each GT with lysates containing Im7-6, ApNGT, and NmLgtB as well as appropriate sugar donors according to their previously established activities. When reaction products were purified by Ni-NTA magnetic beads and analyzed by LC-MS(/MS), we observed mass shifts of intact Im7-6 (**Fig. 3 and Supplementary Fig. 4**) and fragmentation spectra of trypsinized glycopeptides (**Supplementary Fig. 5**) consistent with the modification of the *N*-linked lactose installed by ApNGT and NmLgtB according to the hypothesized activities of all  $\alpha$ 2-3 sialyltransferases (CjCST-I, and PpST3, VsST3, PmST3,6); all  $\alpha$ 2-6 sialyltransferases (PdST6, HsSIAT1, and PIST6); the bifunctional  $\alpha$ 2-3,8 sialyltransferase (CjCST-II); the  $\alpha$ 1-3 galactosyltransferase (BtGGTA); the  $\alpha$ 1-4 galactosyltransferase (NmLgtC); the  $\alpha$ 1-3 fucosyltransferase (HpFutA); the  $\alpha$ 1-2 fucosyltransferase (HpFutC), the pyruvyltransferase (SpPvg1), and one  $\beta$ 1-3 *N*-acetylglucosaminyltransferase (NgLgtA). We did not observe activity from HdGlcNAcT (**Supplementary Fig. 6**). While we did detect low activity from all sialyltransferases either by intact protein or glycopeptide analysis, we found that CjCST-I and PdST6 provided the highest conversion of all  $\alpha$ 2-3 and  $\alpha$ 2-6 sialyltransferases, respectively (**Supplementary Fig. 4**). This optimization demonstrates the ability of GlycoPRIME to quickly compare several biosynthetic pathways to determine the enzyme combinations and conditions that yield the highest conversion to desired products. We also found that we could significantly increase the activity of CjCST-I and HsSIAT1 by conducting CFPS in oxidizing conditions (**Supplementary Fig. 7**), showing the utility of using the open reaction environment of CFPS reactions to improve enzyme synthesis conditions, including the synthesis of a human enzyme with disulfide bonds (HsSIAT1). Notably, we also found that NgLgtA not only installed a  $\beta$ 1-3 *N*-acetylglucosamine, but also worked in turn with NmLgtB to form a polymeric LacNAc structure of up to 6 repeat units (**Fig. 3**). We performed digestions of Im7-6 modified by ApNGT, NmLgtB, and PdST6, HsSIAT1, CjCST-I, HpFutA, HpFutC, NgLgtA, and BtGGTA using commercially available exoglycosidases (**Supplementary Figs. 8 and 9**). Our findings support the previously established linkage specificities of these enzymes (**Figs. 2 and 3 and Supplementary Table 4**). Under these conditions, we found that PmST3,6 exhibited primarily  $\alpha$ 2-3 activity, which is consistent with previous reports<sup>56</sup>.

Having demonstrated the activity of diverse GTs using three enzyme pathways, we pushed the GlycoPRIME system further to evaluate biosynthetic pathways containing four and five enzymes. We aimed to produce sialylated and fucosylated lactose and LacNAc structures using combinations of HpFutA, HpFutC, CjCST-I, PdST6, and NgLgtA. While some combinations of these GTs have been used to create free oligosaccharides or glycolipids<sup>38-41, 57-59</sup>, the potential products of different enzyme combinations resulting from their interacting specificities have not been systematically studied in the context of a protein substrate. We tested all pairwise combinations of these 5 GTs using the GlycoPRIME system by expressing each of them in separate CFPS reactions and then mixing two of those crude lysates in equal volumes with CFPS reactions containing 10  $\mu$ M Im7-6, 0.4  $\mu$ M ApNGT, and 2  $\mu$ M NmLgtB. Upon analysis of these IVG products, we found intact protein (**Fig. 3d**) and glycopeptide fragmentation products (**Supplementary Fig. 10**) indicating the synthesis of several interesting structures including difucosylated lactose, disialylated lactose, lactose variants with combinations of sialylation and fucosylation linkages, sialylated LacNAc structures with branching or only terminal sialic acids, and fucosylated LacNAc structures. This analysis also revealed some possible specificity conflicts between the enzymes. For example, the combinations of CjCST-I with HpFutA and PdST6 with HpFutC yielded products which were both sialylated and fucosylated, but PdST6 with HpFutC and CjCST-I with HpFutC did not (**Supplementary Fig. 11**). Furthermore, we observed that in the combination of HpFutC with NgLgtA, only one fucose is added to the LacNAc backbone regardless of its length (**Fig. 3d and Supplementary Fig. 10**). In contrast, when HpFutA and NgLgtA are combined, our observations suggest that both available Glc(NAc) residues may be modified; however, the shorted polymer length suggests that fucosylation with HpFutA may prohibit the continued growth of the LacNAc chain by NgLgtA (**Fig. 3**). While we focused here on

the testing of single-pot reactions to inform applications in biomanufacturing platforms, sequential glycosylation reactions *in vitro* using a similar workflow could be used to further characterize these specificity conflicts. In a final test of the number of biosynthetic nodes the GlycoPRIME system can support, we constructed several five enzyme biosynthetic pathways using NgLgtA, one fucosyltransferase (HpFutA or HpFutC), and one sialyltransferase (CjCST-I or PdST6). While the complexity of these glycans did not allow us to unambiguously assign their structures, their intact protein mass shifts (**Supplementary Fig. 11**) and fragmentation spectra (**Supplementary Fig. 10**) did indicate the construction of LacNAc structures glycans in pathways containing NgLgtA, PdST6, and either HpFutA or HpFutC which were both fucosylated, sialylated (**Figure 3d** and **Supplementary Figs. 10 and 12**). Many of the glycosylation structures synthesized by these four and five enzyme combinations have not been found in nature or described in detail and further study will be required to understand the properties they might provide.

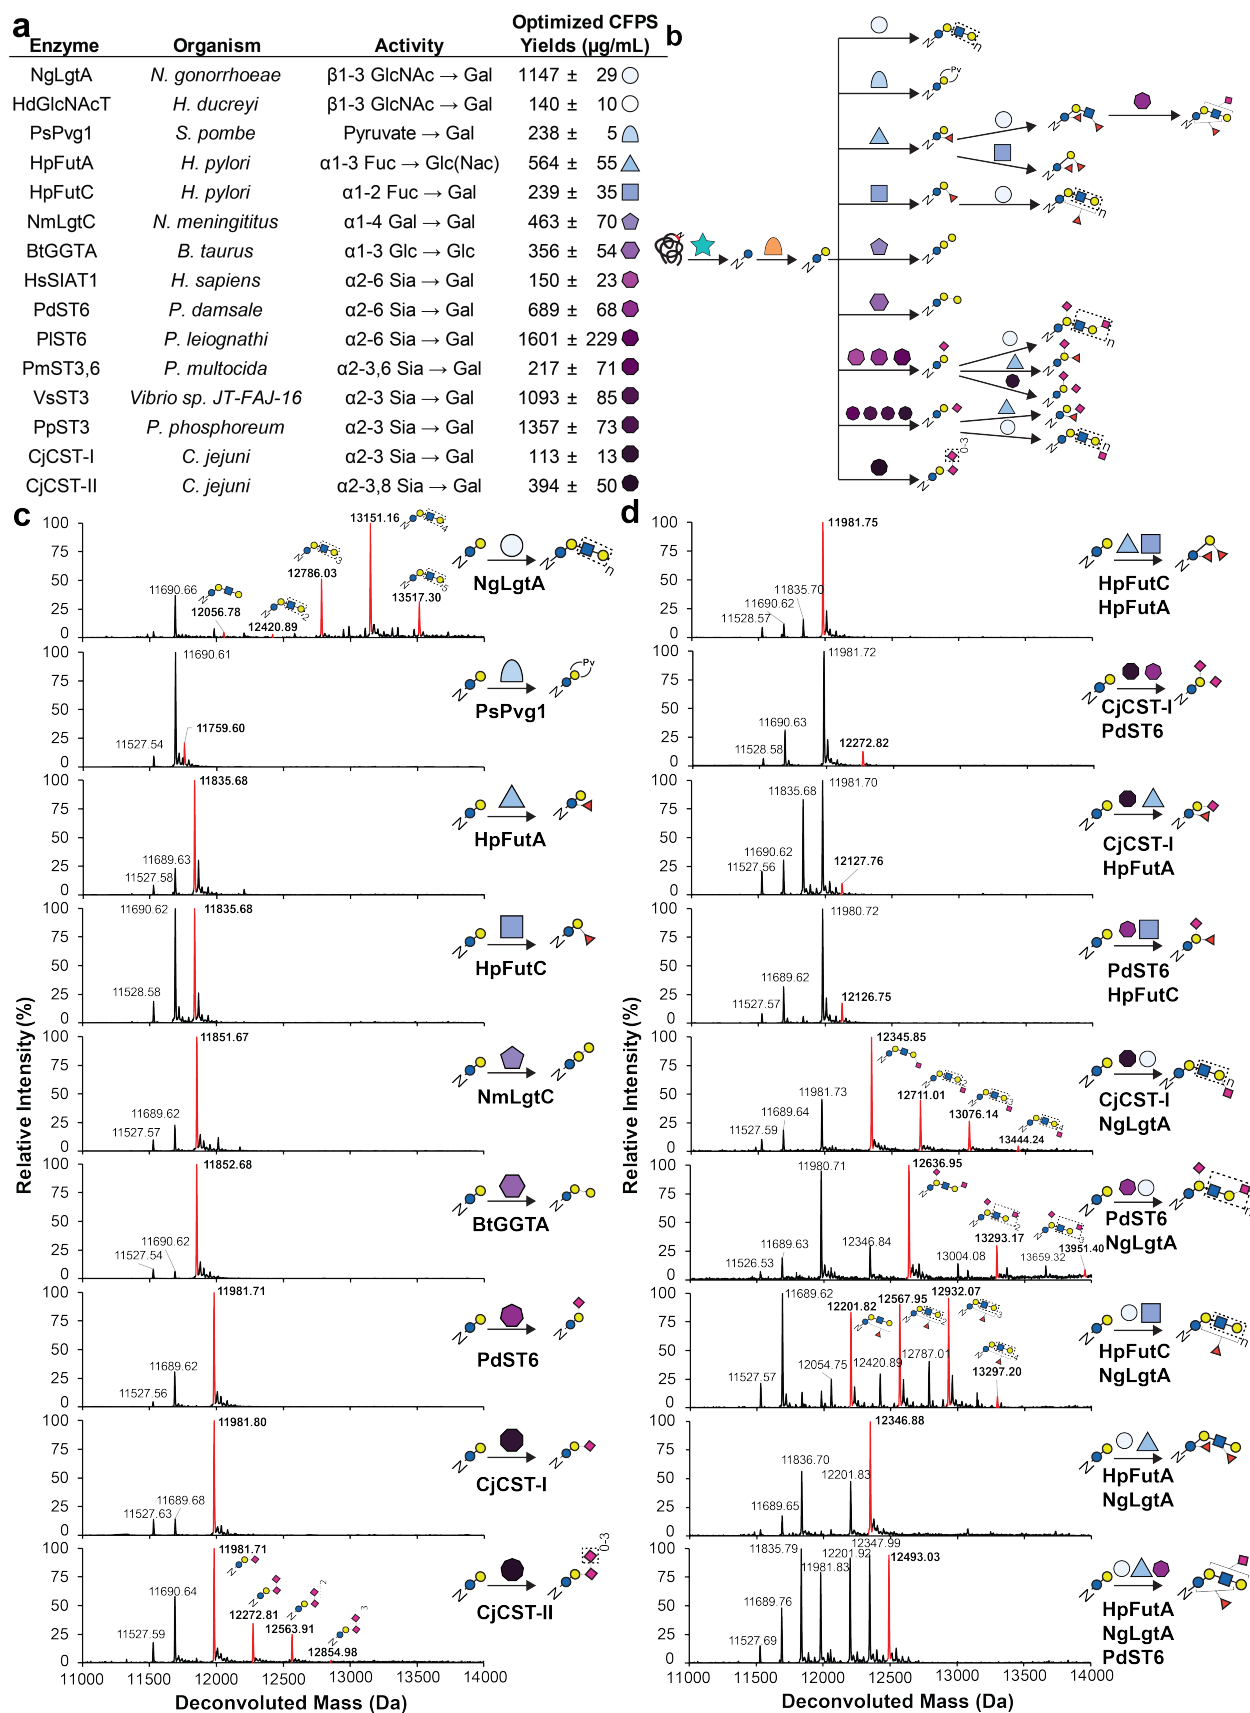

**Figure 3: *In vitro* synthesis and assembly of complex glycosylation pathways.** (a) Protein name, species, previously characterized activity (**Supplementary Table 4**) and optimized CFPS soluble yields (**Supplementary Table 2**) for enzymes tested for elaboration of *N*-linked lactose. CFPS yields and errors indicate mean and S.D. from  $n=3$  CFPS reactions quantified by [ $^{14}\text{C}$ ]-leucine incorporation. CjCST-I and HsSIAT1 yields were measured under oxidizing conditions (see **Supplementary Fig. 7**). (b) Intact deconvoluted MS spectra from Im7-6 protein purified from IVG reactions with 10  $\mu\text{M}$  Im7-6, 0.4  $\mu\text{M}$  ApNGT, 2  $\mu\text{M}$  NmLgtB, 2.5 mM appropriate sugar donors, and 4.0  $\mu\text{M}$  BtGGTA, 5.3  $\mu\text{M}$  NmLgtC, 4.9  $\mu\text{M}$  HpFutA, 2.6  $\mu\text{M}$  HpFutC, 4.9  $\mu\text{M}$  PdST6, 5.0  $\mu\text{M}$  CjCST-II, 1.3  $\mu\text{M}$  CjCST-I, 11.5  $\mu\text{M}$  NgLgtA, or 2.2  $\mu\text{M}$  SpPvg1. Mass shifts of intact Im7-6, fragmentation spectra of trypsinized Im7-6 glycopeptides (**Supplementary Fig. 5**), and exoglycosidase digestions (**Supplementary Figs. 8 and 9**) are consistent with modification of *N*-linked lactose with  $\alpha$ 1-3Gal;  $\alpha$ 1-4Gal;  $\alpha$ 1-3 Fuc;  $\alpha$ 2-6 Sia;  $\alpha$ 2-3 Sia and  $\alpha$ 2-8 Sia;  $\beta$ 1-3 GlcNAc, and pyruvylation according to known GT activities of BtGGTA, NmLgtC, HpFutA, HpFutC, PdST6, CjCST-II, CjCST-I, NgLgtA, or SpPvg1. (d) Deconvoluted intact Im7-6 spectra of fucosylated and sialylated LacNAc structures produced by four and five enzyme combinations. IVG reactions contained 10  $\mu\text{M}$  Im7-6, 0.4  $\mu\text{M}$  ApNGT, 2  $\mu\text{M}$  NmLgtB, appropriate sugar donors and indicated GTs at half or one third the concentrations indicated in **b** for four and five enzyme pathways, respectively. Intact mass shifts and fragmentation spectra (**Supplementary Fig. 10**) are consistent with fucosylation and sialylation of LacNAc core according to known activities. Intact protein and glycopeptide fragmentation spectra from other screened GTs and GT combinations not shown here are found in **Supplementary Figs. 4-6 and 10-12**. To provide maximum conversion, IVG reactions were incubated for 24 h at 30°C, supplemented with an additional 2.5 mM sugar donors and incubated for 24 h at 30°C. Spectra were acquired from full elution areas of all detected glycosylated and aglycosylated Im7 species and are representative of at least  $n=2$  IVGs. Spectra from  $m/z$  100-2000 were deconvoluted into 11,000-14,000 Da using Compass Data Analysis maximum entropy method.

### Translating GlycoPRIME pathways to portable cell-free and bacterial production platforms

Having demonstrated the ability to construct new biosynthetic pathways using our modular, cell-free approach, we set out to transfer therapeutically relevant GlycoPRIME pathways to *in vitro* and *in vivo* production platforms (**Fig. 4**). Our goal was to determine if our newly discovered pathways could be used in different contexts and on different target proteins.

First, we aimed to produce a protein vaccine candidate modified with an  $\alpha$ Gal epitope in a one-pot CFGpS platform. We selected cell-free biosynthesis as a production platform because this approach has recently generated significant interest for portable, on-demand biomanufacturing using freeze-dried components at the point-of-need<sup>60-63</sup>. In contrast to the cell-free lysate mixing approach used in GlycoPRIME for engineering and discovering new pathways, here we focused on designing a one-pot production platform. In this CFGpS system, the glycosylation target protein is co-expressed with GTs in the presence of sugar donors to simultaneously synthesize and glycosylate the glycoprotein of interest. This method complements our previously reported one-pot CFGpS platform<sup>18</sup> by synthesizing the glycosylation pathway enzymes *in vitro* rather than within the chassis strain before lysis. We also used commercially available activated sugar donors rather than LLOs, allowing for the testing of multienzyme pathways without the need to produce new chassis strains for each enzyme combination. We validated our one-pot approach by mixing the Im7-6 target protein plasmid, sets of up to three GT plasmids based on 12 successful biosynthetic pathways developed in our two-pot GlycoPRIME screening, and appropriate activated sugar donors in one-pot CFGpS reactions. In all reactions, we observed intact protein mass shifts consistent with the modification of Im7-6 with the same glycans observed in our two-pot system, albeit at lower efficiency (**Supplementary Fig. 13**). After validating our one-pot approach, we set-out to synthesize and glycosylate the recently reported influenza vaccine candidate, H1HA10<sup>64</sup>, with  $\alpha$ Gal using the biosynthetic pathway discovered by GlycoPRIME screening (**Fig. 4**). We selected H1HA10 as a model protein to demonstrate the  $\alpha$ Gal pathway because it is an effective immunogen that can be expressed in *E. coli*, and the chemoenzymatic installation of  $\alpha$ Gal has been shown to act as an intramolecular adjuvant for other influenzae vaccine proteins<sup>7, 65</sup>. When we combined UDP-Glc, UDP-Gal, and plasmids encoding the H1HA10 protein ApNGT, NmLgtB, and BtGGTA in a one-pot CFGpS reaction, we observed the installation of  $\alpha$ Gal on a tryptic peptide containing an engineered acceptor sequence at the *N*-terminus of the

H1HA10 protein (**Fig. 4b**). We further confirmed the linkages of the  $\alpha$ Gal glycan at this site by digestion with commercially available exoglycosidases and MS/MS (**Fig. 4c-d and Supplementary Table 6**).

The advent of bacterial glycoengineering has presented new opportunities for protein vaccine and therapeutic production<sup>9</sup>. While polysialylated glycoproteins have been produced in engineered *E. coli*<sup>21</sup>, different terminal sialic acid linkages and simplified, more homogeneous glycosylation structures are desirable for some applications of glycoprotein therapeutics<sup>14, 44</sup>. To demonstrate the utility of GlycoPRIME for discovering pathways to manufacture glycoproteins in cells, we designed glycosylation systems to install *N*-linked 3'-sialyllactose and 6'-sialyllactose in living *E. coli* (**Fig. 4**). Specifically, we sought to produce the Fc region of human IgG1 modified with terminal sialic acids in  $\alpha$ 2-3 and  $\alpha$ 2-6 linkages, which are known to modulate protein stability and therapeutic trafficking<sup>5, 8, 36</sup>. To achieve this goal, we constructed a three-plasmid system composed of a constitutively expressed cytidine-5'-monophospho-*N*-acetylneuraminic acid (CMP-Sia) synthesis plasmid containing the CMP-Sia synthase from *N. meningitidis* (ConNeuA), an IPTG-inducible target protein plasmid, and a GT operon plasmid containing ApNGT, NmLgtB, and either CjCST-I or PdST6. The CMP-Sia synthase plasmid is necessary because *E. coli* strains do not endogenously produce CMP-Sia. Following previously reported strategies for production of CMP-Sia in *E. coli*<sup>21, 41, 66</sup>, we selected a K-12 derived *E. coli* strain carrying the NanT sialic acid transporter gene for intake of sialic acid supplemented in the media and knocked out the NanA CMP-Sia aldolase gene to prevent digestion of intracellular sialic acid, yielding CLM24 $\Delta$ nanA. As with CFGpS, we validated the synthesis of our target glycans on the Im7-6 model protein. When we transformed our three-plasmid system into CLM24 $\Delta$ nanA and induced both target protein and GT operon expression, we observed intact protein spectra consistent with the modification of Im7-6 with *N*-linked Glc by ApNGT, the elaboration to lactose by NmLgtB, and the elaboration to 3'-sialyllactose or 6'-sialyllactose by CjCST-I or PdST6, respectively (**Supplementary Fig. 14**). To synthesize Fc modified with these glycans, we replaced the Im7-6 target plasmid with a plasmid encoding the human IgG Fc region containing an engineered acceptor site at the conserved Asn297 glycosylation site (Fc-6)<sup>26</sup>. In this system, we observed intact protein MS, MS/MS peptide fragmentation, and exoglycosidase digestions consistent with the expected installation of Glc, lactose, and either 3'-sialyllactose or 6'-sialyllactose onto Fc-6 according to the GT operon supplied (**Fig. 4f-h, Supplementary Fig. 15, and Supplementary Table 7**). Further investigations will be required to assess the efficacy of the  $\alpha$ Gal epitope as an adjuvant for H1HA10 and the therapeutic effects of minimal sialic acid motifs on Fc. However, our findings clearly demonstrate how the high level of control and modularity afforded by the GlycoPRIME workflow can facilitate the design of biosynthetic pathways to produce diverse glycoproteins in cell-free platforms and the bacterial cytoplasm.

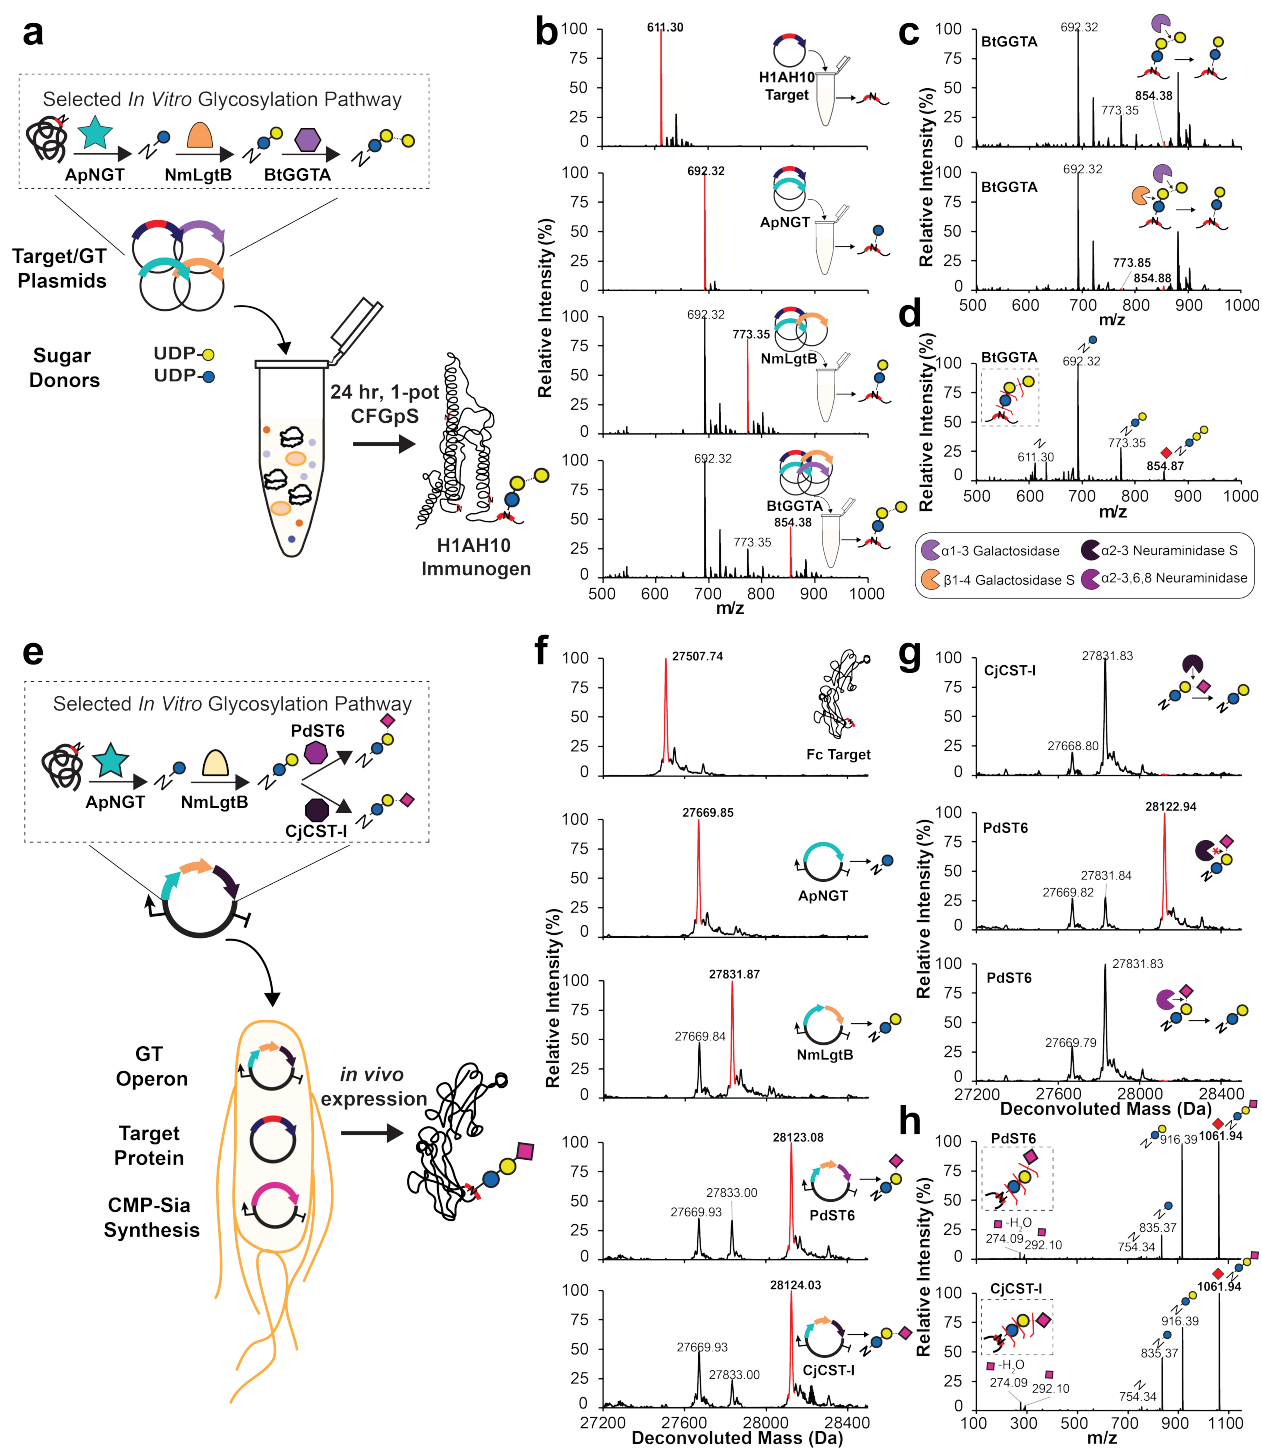

**Figure 4: Design of biosynthetic pathways for cell-free and bacterial production platforms.** (a) One-pot CFGpS for synthesis of H1AH10 protein vaccine modified with  $\alpha$ Gal glycan. Plasmids encoding the target protein and biosynthetic pathway GTs discovered by GlycoPRIME screening were combined with activated sugar donors in a CFGpS reaction. (b) Trypsinized glycopeptide MS spectra, (c) exoglycosidase digestions of glycopeptide, and (d) MS/MS glycopeptide fragmentation spectra from H1AH10 purified from IVG reactions containing equimolar amounts of each indicated plasmid encoding H1AH10, ApNGT, NmLgtB, and BtGGTA and 2.5 mM of UDP-Glc and UDP-Gal (see see **Methods**). All reactions contained 10 nM total plasmid concentration and were incubated for 24 h at 30°C. The glycopeptide contains one engineered acceptor sequence located at the N-terminus of H1AH10. Observed masses

and mass shifts in **b-d** spectra are consistent with modification of the H1HA10 peptide with *N*-linked Glc by ApNGT, lactose (Glc $\beta$ 1-4Gal) by ApNGT and NmLgtB, or  $\alpha$ Gal epitope (Glc $\beta$ 1-4Gal $\alpha$ 1-3Gal) by ApNGT, NmLgtB, and BtGGTA. **(e)** Design of cytoplasmic glycosylation systems to produce sialylated IgG Fc in *E. coli*. Three plasmids containing NmNeuA (CMP-Sia synthesis), IgG Fc engineered with an optimized acceptor sequence (target protein), and biosynthetic pathways discovered using GlycoPRIME (GT operon). **(f)** Deconvoluted intact glycoprotein MS spectra, **(g)** exoglycosidase digestions of intact glycoprotein, and **(h)** MS/MS glycopeptide fragmentation spectra from Fc-6 purified from *E. coli* cultures supplemented with sialic acid, IPTG, and arabinose and incubated at 25°C overnight (see **Methods**). The last GT in all glycosylation pathways is indicated. MS spectra were acquired from full elution areas of all detected glycosylated and aglycosylated protein or peptide species and are representative of *n*=3 CFGpS or *E. coli* cultures. MS/MS spectra acquired by pseudo Multiple Reaction Monitoring (MRM) fragmentation at theoretical glycopeptide masses (red diamonds) corresponding to detected intact glycopeptide or protein MS peaks using 30 eV collisional energy. Deconvoluted spectra collected from *m/z* 100-2000 into 27,000-29,000 Da using Compass Data Analysis maximum entropy method. See **Supplementary Tables 5-7** for theoretical masses.

## Discussion

In this work, we established and demonstrated the utility of the GlycoPRIME platform, a cell-free workflow for the modular synthesis and assembly of multienzyme glycosylation pathways. By moving GT production and biosynthetic pathway construction outside of the cell using CFPS and the multiplexed mixing of GT-enriched crude lysates, we were able to rapidly explore 37 putative protein glycosylation pathways, 23 of which successfully produced unique glycosylation motifs. Key to the modular assembly of these pathways was the use of ApNGT, a soluble enzyme easily expressed in bacterial systems, to efficiently install a priming *N*-linked glucose onto glycoproteins. By elaborating this glucose residue, we were able to create diverse glycosylation motifs *in vitro* from the bottom-up that otherwise would have required the engineering of many living cell lines. Of the 23 unique glycosylation motifs produced in this work, many have been synthesized as free<sup>38-41, 57, 58</sup> or lipid-linked<sup>38, 39</sup> oligosaccharides or by remodeling existing glycoproteins<sup>6, 27, 42</sup>; however, to our knowledge, only glucose<sup>21, 22, 26</sup>, dextran<sup>22</sup>, lactose<sup>21</sup>, LacNAc<sup>59</sup>, and polysialyllactose<sup>21</sup> have been previously produced as glycoprotein conjugates in bacterial systems. Therefore, the pathways described in this paper represent a major addition to the repertoire of *N*-linked glycans that can be produced in bacterial glycoprotein engineering platforms. To our knowledge, we achieved the first bacterial biosynthesis of proteins bearing *N*-linked 3'-sialyllactose, 6'-sialyllactose, the  $\alpha$ Gal epitope, pyruvylated lactose, 2'-fucosyllactose (Glc $\beta$ 1-4Gal $\alpha$ 1-2Fuc), 3-fucosyllactose (Glc $\beta$ 1-4[ $\alpha$ 1-3Fuc]Gal), as well as many mono- or di-fucosylated and sialylated forms of lactose or LacNAc. Many of these protein-linked glycans may provide new antigens or desired properties for protein vaccines and therapeutics. For example,  $\alpha$ Gal is known to be immunostimulatory<sup>6, 7</sup> and terminal sialic acids can increase protein therapeutic stability and modulate protein trafficking<sup>5, 8, 36</sup>.

An important feature of GlycoPRIME screening is that discovered pathways can be implemented in new contexts and on new proteins for biomanufacturing platforms *in vitro* and in the *E. coli* cytoplasm. Specifically, we demonstrated the production of a candidate vaccine protein, H1AH10, modified with an  $\alpha$ Gal motif in a one-pot CFGpS reaction and the production of IgG1 Fc region modified with 3'-sialyllactose and 6'-sialyllactose in living *E. coli* (**Fig. 4**). The use of ApNGT for protein conjugation in the glycosylation pathways described in this work makes them attractive for the production of glycoproteins in bacterial systems because they do not require transport across cellular membranes or membrane-associated components.

Looking forward, GlycoPRIME provides a new way to discover, study, and optimize natural and synthetic glycosylation pathways. For example, future applications (particularly those involving biosynthetic pathways with many GTs) could leverage GlycoPRIME to better understand GT specificities and identify optimal sets of enzymes and enzyme stoichiometry for biosynthesis. By enabling the identification and rapid assembly of enzymes that reliably produce desired glycoproteins, GlycoPRIME is also poised to expand the glycoengineering toolkit and help enable

the production of glycoproteins on demand and by design. For example, recent reports showing successful production of ppGalNAcTs<sup>26</sup> and OSTs<sup>19</sup> *in vitro* as well as methods to supplement lipid-associated glycans into cell-free synthesis reactions<sup>18-20, 67</sup> present new opportunities to discover biosynthetic pathways yielding diverse glycosylation structures (*N*- and *O*-linked) with small modifications to the GlycoPRIME workflow. Finally, the diverse glycans accessible by GlycoPRIME pathways could be useful for systematically determining the minimal requirements for desired glycoprotein functions and properties endowed by larger glycans structures.

In summary, we expect that the GlycoPRIME method and new biosynthetic pathways described in this work will quicken the pace of development towards improved glycoprotein therapeutics and make possible new biomanufacturing opportunities.



## Acknowledgements

The authors acknowledge T. Jaroentomeechai, A. Karim, J. Hershewe, and J. Kath for helpful critiques and sharing of reagents as well as S. Habibi, A. Ott, and S. Shafie for assistance with LC-MS instrumentation. This work made use of the IMSERC core facility at Northwestern University, which has received support from the Soft and Hybrid Nanotechnology Experimental (SHyNE) Resource (NSF ECCS-1542205), the State of Illinois, and the International Institute for Nanotechnology (IIN). This material is based upon work supported by the Defense Threat Reduction Agency (HDTRA1-15-10052/P00001), the David and Lucile Packard Foundation, the Dreyfus Teacher-Scholar program, the National Institutes of Health (NIH) and National Institutes of Environmental Health Sciences (NIEHS) through T32 ES007059, and the National Science Foundation through MCB-1413563 and the Graduate Research Fellowship program (DGE-1324585). Its contents are the sole responsibility of the authors and do not necessarily represent the official views the funding agencies above.

## Author contributions

W.K., K.E.D, A.R., and A.H.T designed, performed, and analyzed experiments. A.N. constructed plasmids and assisted with engineered *E. coli* strain design. L.L. and A.Y. conducted early glycosyltransferase activity screens. J.C.S. and M.P.D. assisted with CFGpS system development. M.P.D. and M.M. interpreted the data and helped guide the study. M.C.J. interpreted the data and directed the study. W.K. and M.C.J. conceived of the study and wrote the manuscript.

## Competing Interests Statement

M.P.D. has a financial interest in Glycobia, Inc. and Versatope, Inc. M.P.D.'s interests are reviewed and managed by Cornell University in accordance with their conflict of interest policies. All other authors declare no competing interests.

## Data availability

All data generated or analyzed during this study are included in this article (and its supplementary information) or are available from the corresponding authors on reasonable request.

## Corresponding Author

Correspondence to Michael C. Jewett.

## Methods

**Plasmid construction and molecular cloning.** Details and sources of plasmids used in this study are shown in **Supplementary Table 1** with applicable database accession numbers. Full coding sequence regions with plasmid context are shown in **Supplementary Note 1**. Codon-optimized DNA sequences encoding glycosylation targets and GTs in CFPS were synthesized as gene fragments or intact plasmids by Twist Bioscience, Integrated DNA Technologies, or Life Technologies. Gene fragments were inserted between NdeI and Sall restriction sites in the pJL1<sup>26</sup> *in vitro* expression vector using Gibson assembly and standard molecular biology techniques<sup>68</sup>. Some GTs were produced with an *N*-terminal CAT-Strep-Linker (CSL) fusion sequence that has been shown to increase *in vitro* expression<sup>26</sup> (see **Supplementary Note 1**). Plasmids for expression of Im7-6 and Fc-6 glycosylation targets in the CLM24 $\Delta$ *nanA* *E. coli* strain were generated by polymerase chain reaction (PCR) amplification of engineered forms of Im7 (Im7-6) and Fc (Fc-6) carrying optimized ApNGT glycosylation acceptor sequences and His-tags from pJL1.Im7-6 and pJL1.Fc-6<sup>26</sup>. These gene fragments were then placed into a pBR322 (ptrc99) backbone<sup>69</sup> with Carbenicillin resistance and IPTG inducible expression between NcoI and HindIII restriction sites using Gibson assembly. Plasmids for expression of GT operons in *E. coli* were constructed by PCR amplification of ApNGT, NmLgtB, and CjCST-I or PdST6 from their pJL1 plasmid forms followed by Gibson assembly into a pMAF10 backbone<sup>26</sup> with Trimethoprim resistance, a pBBR1 origin of replication, and arabinose inducible expression between NcoI and HindIII restriction sites. Strep-II tags, FLAG-tags, and ribosome binding sites designed using the RBS Calculator v2.0<sup>70</sup> for maximum translation initiation rate were inserted into these plasmids as shown in **Supplementary Table 1** and **Supplementary Note 1**. The pCon.NeuA plasmid for production of CMP-Sia in *E. coli* was generated by PCR amplification of NeuA from pTF<sup>71</sup> followed by Gibson assembly into a pConYCG backbone with Kanamycin resistance and modified with a P<sub>32100</sub> promoter for constitutive expression between the NsiI and Sall restriction sites.

**Preparation of cell extracts for CFPS.** CFPS of glycosylation enzymes and target proteins was performed using crude *E. coli* lysate from a recently described, high-yielding MG1655-derived *E. coli* strain C321. $\Delta$ A.759<sup>32</sup> prepared using well-established methods<sup>26, 32</sup>. Briefly, 1-liter cultures of *E. coli* cells were grown from a starting OD<sub>600</sub> = 0.08 in 2xYTPG media (yeast extract 10 g/l, tryptone 16 g/l, NaCl 5 g/l, K<sub>2</sub>HPO<sub>4</sub> 7 g/l, KH<sub>2</sub>PO<sub>4</sub> 3 g/l, and glucose 18 g/l, pH 7.2) in 2.5-liter Tunair flasks at 34°C with shaking at 250 r.p.m. Cells were harvested on ice at OD<sub>600</sub> = 3.0 and pelleted by centrifugation at 5,000xg at 4°C for 15 min. Cell pellets were washed three times with cold S30 buffer (10 mM Tris-acetate pH 8.2, 14 mM magnesium acetate, 60 mM potassium acetate, 2 mM dithiothreitol [DTT]) before being frozen on liquid nitrogen and then stored at -80°C. Cell pellets were thawed on ice and resuspended in 0.8 ml of S30 buffer per gram of wet cell weight and lysed in 1.4 ml aliquots on ice using a Q125 Sonicator (Qsonica) using three pulses (50% amplitude, 45 s on and 59 s off). After sonication, 4  $\mu$ l of 1 M DTT was added to each aliquot. Each aliquot was centrifuged at 12,000xg and 4°C for 10 min. The supernatant was incubated at 37°C at 250 r.p.m. for 1 h and centrifuged at 10,000xg at 4°C for 10 min. The clarified S12 lysate supernatant was then frozen on liquid nitrogen and stored at -80°C.

**Cell-free protein synthesis.** CFPS of glycosylation targets and GTs was performed using a well-established PANOX-SP crude lysate system<sup>72</sup>. Briefly, CFPS reactions contained 0.85 mM each of GTP, UTP, and CTP; 1.2 mM ATP; 170  $\mu$ g/ml of *E. coli* tRNA mixture; 34  $\mu$ g/ml folinic acid; 16  $\mu$ g/ml purified T7 RNA polymerase; 2 mM of each of the 20 standard amino acids; 0.27 mM coenzyme-A (CoA); 0.33 mM nicotinamide adenine dinucleotide (NAD); 1.5 mM spermidine; 1 mM putrescine; 4 mM sodium oxalate; 130 mM potassium glutamate; 12 mM magnesium glutamate; 10 mM ammonium glutamate; 57 mM HEPES at pH = 7.2; 33 mM phosphoenolpyruvate (PEP); 13.3  $\mu$ g/ml DNA plasmid template encoding the desired protein in

the pJL1 vector; and 27% v/v of *E. coli* crude lysate. *E. coli* total tRNA mixture (from strain MRE600) and phosphoenolpyruvate were purchased from Roche Applied Science. ATP, GTP, CTP, UTP, the 20 amino acids, and other materials were purchased from Sigma-Aldrich. Plasmid DNA for CFPS was purified from DH5- $\alpha$  *E. coli* strain (NEB) using ZymoPURE Midi Kit (Zymo Research). CFPS reactions under oxidizing conditions conducive to disulfide bond formation were performed similarly to standard CFPS reactions except for the use of a 30 minute preincubation of the lysate with 14.3  $\mu$ M IAM and the addition of 4 mM oxidized L-glutathione GSSG, 1 mM reduced L-glutathione, and 3  $\mu$ M of purified *E. coli* DsbC to the CFPS reaction<sup>73</sup>. All proteins were expressed in 15  $\mu$ l batch CFPS reactions in 2.0 ml centrifuge tubes. For GlycoPRIME, CFPS reactions were incubated for 20 h at optimized temperatures for each protein (**Supplementary Table 2**).

**Cell-free glycoprotein synthesis.** One-pot, CFGpS was performed similarly to CFPS, except that CFGpS reactions had a total volume of 50  $\mu$ l and were supplemented with 2.5 mM of each appropriate activated sugar donor as well as multiple plasmid templates from the desired target protein and up to three GTs. CFGpS reactions contained a total plasmid concentration of 10 nM, divided equally between each of the unique plasmids in the reaction. CFGpS reactions were incubated for 24 h at 23°C before purification by Ni-NTA magnetic beads for glycopeptide or intact protein analysis by LC-MS.

**Quantification of CFPS yields.** CFPS yields of glycosylation targets and GTs for GlycoPRIME were determined by supplementation of standard CFPS reactions with 10  $\mu$ M [<sup>14</sup>C]-leucine using established protocols<sup>26, 32</sup>. Briefly, proteins produced in CFPS were precipitated and washed three times using 5% trichloroacetic acid (TCA) followed by quantification of incorporated radioactivity by a Microbeta2 liquid scintillation counter. Soluble yields were determined from fractions isolated after centrifugation at 12,000xg for 15 min at 4°C. Low levels of background radioactivity were measured in CFPS reactions containing no plasmid template and subtracted before calculation of protein yields.

**Assembly and purification from *in vitro* glycosylation reactions.** IVG reactions for GlycoPRIME were assembled in standard 0.2 ml tubes from the supernatant of completed CFPS reactions containing the Im7-6 target protein and indicated GTs centrifuged at 12,000xg for 10 min at 4°C. Target and enzyme yields were quantified and optimized by [<sup>14</sup>C]-leucine incorporation (**Supplementary Table 2**). Standard IVG reactions contained 10  $\mu$ M Im7-6 target, indicated amounts of up to five GTs forming a putative biosynthetic pathway, 10 mM MnCl<sub>2</sub> (to provide the preferred metal cofactor for NmLgtB and other GTs), 23 mM HEPES buffer at pH = 7.5, and 2.5 mM of each required nucleotide-activated sugar donor (according to previously characterized activities shown in **Supplementary Table 4**). Each reaction contained a total volume of 32  $\mu$ l with 25  $\mu$ l of completed CFPS reactions (when necessary, the remaining CFPS reaction volume was filled by a completed CFPS reaction which had synthesized sfGFP). After assembly, IVG reactions containing up to two GTs were incubated for 24 h at 30°C. To increase conversion, IVG reactions containing more than two GTs were incubated for 24 h at 30°C, supplemented with an additional 2.5 mM of each activated sugar donor, and then incubated for an additional 24 h. When desired, both CFPS reactions and IVGs could be flash-frozen after their respective incubation steps. After incubation, Im7-6 was purified from IVG reactions using magnetic His-tag Dynabeads (Thermo Fisher Scientific). The IVG reactions were diluted in 90  $\mu$ l of Buffer 1 (50 mM NaH<sub>2</sub>PO<sub>4</sub> and 300 mM NaCl, pH 8.0) and centrifuged at 12,000xg for 10 min at 4°C. This supernatant was incubated at room temperature for 10 min on a roller with 20  $\mu$ l of beads which had been equilibrated with 120  $\mu$ l of Buffer 1. The beads were then washed three times with 120  $\mu$ l of Buffer 1 and then eluted using 70  $\mu$ l of Buffer 1 with 500 mM imidazole. The samples were dialyzed against Buffer 2 (12.5 mM NaH<sub>2</sub>PO<sub>4</sub> and 75 mM NaCl, pH 7.5) overnight using 3.5 kDa

MWCO microdialysis cassettes (Pierce). Purification of one-pot CFGpS reactions was completed similarly to IVG reactions.

**Production and purification of glycoproteins from living *E. coli*.** The *E. coli* strain CLM24 $\Delta$ *nanA* (genotype W3110  $\Delta$ *wecA*  $\Delta$ *nanA*  $\Delta$ *waaL*::kan) was constructed to enable the intake and survival of sialic acid in the cytoplasm for the production of sialylated glycoproteins *in vivo*. CLM24 $\Delta$ *nanA* was generated from W3110 using P1 transduction of the *wecA*::kan, *nanA*::kan, and *waaL*::kan alleles in that order, derived from the Keio collection<sup>74</sup>. Between successive transductions, the kanamycin marker was removed using pE-FLP as described previously<sup>75</sup>. As indicated, CLM24 $\Delta$ *nanA* was sequentially transformed with the CMP-Sia production plasmid pCon.NeuA; a target protein plasmid pBR322.Im7-6 or pBR322.Fc-6; and a GT operon plasmid pMAF10.NGT, pMAF10.ApNGT.NmLgtB, pMAF10.CjCST-I.NmLgtB.ApNGT, or pMAF10.PdST6.NmLgtB.ApNGT by isolating individual clones with appropriate antibiotics at each step. The completed strain was then used to inoculate a 5 ml overnight culture in LB media containing appropriate antibiotics which was then subcultured at OD<sub>600</sub> = 0.08 into 5 ml of fresh LB media supplemented with 5 mM *N*-Acetylneuraminic acid (sialic acid) purchased from Carbosynth and adjusted to pH = 6.0 using NaOH and HCl. This culture was then grown at 37°C with shaking at 250 r.p.m. GT operon expression was induced by supplementing the culture with 0.2% arabinose at OD<sub>600</sub> = 0.4 and then target protein expression was induced at OD<sub>600</sub> = 1.0 with 1 mM IPTG. After IPTG induction, the culture was grown overnight at 28°C and 250 r.p.m. The cells were pelleted by centrifugation at 4°C for 10 min at 4,000xg, frozen on liquid nitrogen, and stored at -80°C. Cell pellets were thawed and resuspended in 630  $\mu$ l of Buffer 1 with 5 mM imidazole and supplemented with 70  $\mu$ l of 10 mg/ml lysozyme (Sigma), 1  $\mu$ l (250 U) Benzonase (Millipore), and 7  $\mu$ l of 100X Halt protease inhibitor (Thermo Fisher Scientific). After 15 min of thawing and resuspension, the cells were incubated for 15-60 min on ice, sonicated for 45 s at 50% amplitude, and then centrifuged at 12,000xg for 15 min. The supernatant was then incubated on a roller for 10 min at RT with 50  $\mu$ l of His-tag Dynabeads which had been pre-equilibrated with 5 mM imidazole in Buffer 1. The beads were then washed three times with 1 ml of Buffer 1 containing 5 mM imidazole and then eluted with 70  $\mu$ l of Buffer 1 with 500 mM imidazole by a 10 min incubation on a roller at RT. Samples were then dialyzed with 3.5 kDa MWCO microdialysis cassettes overnight against Buffer 2 before glycopeptide or glycoprotein processing and analysis for LC-MS.

**LC-MS analysis of glycoprotein modification.** Modification of intact glycoprotein targets was determined by LC-MS by injection of 5  $\mu$ l (or about 5 pmol) of His-tag purified, dialyzed glycoprotein into a Bruker Elute UPLC equipped with an ACQUITY UPLC Peptide BEH C4 Column, 300Å, 1.7  $\mu$ m, 2.1 mm X 50 mm (186004495 Waters Corp.) with a 10 mm guard column of identical packing (186004495 Waters Corp.) coupled to an Impact-II UHR TOF Mass Spectrometer (Bruker Daltonics, Inc.). Before injection, Fc samples were reduced with 50 mM DTT. Liquid chromatography was performed using 100% H<sub>2</sub>O and 0.1% formic acid as Solvent A and 100% acetonitrile and 0.1% formic acid as Solvent B at a flow rate of 0.5 mL/min and a 50°C column temperature. An initial condition of 20% B was held for 1 min before elution of the proteins of interest during a 4 min gradient from 20% to 50% B. The column was washed and equilibrated by 0.5 min at 71.4% B, 0.1 min gradient to 100% B, 2 min wash at 100% B, 0.1 min gradient to 20% B, and then a 2.2 min hold at 20% B, giving a total 10 min run time. An MS scan range of 100-3000 m/z with a spectral rate of 2 Hz was used. External calibration was performed prior to data collection.

**LC-MS analysis of glycopeptide modification.** Glycopeptides for LC-MS(/MS) analysis were prepared by digesting His-tag purified, dialyzed glycosylation targets with 0.0044  $\mu$ g/ $\mu$ l MS Grade Trypsin (Thermo Fisher Scientific) at 37°C overnight. Before injection, H1HA10 samples were reduced by incubation with 10 mM DTT for 2 h. LC-MS(/MS) was performed by injection of 2  $\mu$ l

(or about 2 pmol) of digested glycopeptides into a Bruker Elute UPLC equipped with an ACQUITY UPLC Peptide BEH C18 Column, 300Å, 1.7 µm, 2.1 mm X 100 mm (186003686 Waters Corp.) with a 10 mm guard column of identical packing (186004629 Waters Corp.) coupled to an Impact-II UHR TOF Mass Spectrometer. Liquid chromatography was performed using 100% H<sub>2</sub>O and 0.1% formic acid as Solvent A and 100% acetonitrile and 0.1% formic acid as Solvent B at a flow rate of 0.5 mL/min and a 40°C column temperature. An initial condition of 0% B was held for 1 min before elution of the peptides of interest during a 4 min gradient to 50% B. The column was washed and equilibrated by a 0.1 min gradient to 100% B, a 2 min wash at 100% B, a 0.1 min gradient to 0% B, and then a 1.8 min hold at 0% B, giving a total 9 min run time. LC-MS/MS of glycopeptides was performed to confirm that GT modifications were in accordance with previously characterized specificities. Pseudo multiple reaction monitoring (MRM) MS/MS fragmentation was targeted to theoretical glycopeptide masses corresponding to detected intact protein MS peaks. All glycopeptides were fragmented using a collisional energy of 30 eV with a window of ± 2 m/z from targeted m/z values. Theoretical protein, peptide, and sugar ion masses derived from expected glycosylation structures are shown in **Supplementary Tables 3 and 5-7**. For LC-MS and LC-MS/MS of glycopeptides, a scan range of 100-3000 m/z with a spectral rate of 8 Hz was used. External calibration was performed prior to data collection.

**Exoglycosidase digestions.** When possible, sugar linkages installed by various GTs and biosynthetic pathways were confirmed by exoglycosidase digestion using commercially available enzymes from New England Biolabs with well-characterized activities. As indicated in figures and figure legends, glycoproteins or glycopeptides were incubated with exoglycosidases for at least 4 h at 37°C using buffers and digestion conditions suggested by the manufacturer. The exoglycosidases and associated product numbers used in this study are: β1-4 Galactosidase S (P0745S); α1-3,6 Galactosidase (P0731S); α1-3,4 Fucosidase (P0769S); and α1-2 Fucosidase (P0724S); α1-3,4,6 Galactosidase (P0747S); β-N-Acetylglucosaminidase S (P0744S); α2-3 Neuraminidase S (P0743S); and α2-3,6,8 Neuraminidase (P0720S).

**LC-MS(/MS) data analysis.** LC-MS(/MS) data was analyzed using Bruker Compass Data Analysis version 4.1. Glycopeptide MS and intact glycoprotein MS spectra were averaged across the full elution times of the glycosylated and aglycosylated glycoforms (as determined by extracted ion chromatograms of theoretical glycopeptide and glycoprotein charge states). MS spectra for intact glycoproteins was then analyzed by Data Analysis maximum entropy deconvolution from the full m/z scan range of 100-2,000 into a mass range of 10,000-14,000 Da for Im7-6 samples or 27,000-29,000 Da for Fc-6 samples. Representative LC-MS/MS spectra from MRM fragmentation were selected and annotated manually. Observed glycopeptide m/z and intact protein deconvoluted masses are annotated in figures and theoretical values are shown in **Supplementary Tables 3 and 5-7**. LC-MS(/MS) data was exported from Compass Data Analysis and plotted in Microsoft Excel 365.

**Statistical Information.** Figure legends indicate exact sample numbers for means, standard deviations (error bars), and representative data for each experiment. No tests for statistical significance or animal subjects were used in this study.

## References

1. Helenius, A. & Aebi, M. Intracellular functions of N-linked glycans. *Science* **291**, 2364-2369 (2001).
2. Khoury, G.A., Baliban, R.C. & Floudas, C.A. Proteome-wide post-translational modification statistics: frequency analysis and curation of the swiss-prot database. *Scientific Reports* **1**, 90 (2011).
3. Sethuraman, N. & Stadheim, T.A. Challenges in therapeutic glycoprotein production. *Current Opinions in Biotechnology* **17**, 341-346 (2006).
4. Elliott, S. et al. Enhancement of therapeutic protein in vivo activities through glycoengineering. *Nature Biotechnology* **21**, 414-421 (2003).
5. Varki, A. Sialic acids in human health and disease. *Trends in Molecular Medicine* **14**, 351-360 (2008).
6. Abdel-Motal, U.M. et al. Increased immunogenicity of HIV-1 p24 and gp120 following immunization with gp120/p24 fusion protein vaccine expressing alpha-gal epitopes. *Vaccine* **28**, 1758-1765 (2010).
7. Abdel-Motal, U.M., Guay, H.M., Wigglesworth, K., Welsh, R.M. & Galili, U. Immunogenicity of influenza virus vaccine is increased by anti-gal-mediated targeting to antigen-presenting cells. *Journal of Virology* **81**, 9131-9141 (2007).
8. Lin, C.-W. et al. A common glycan structure on immunoglobulin G for enhancement of effector functions. *Proceedings of the National Academy of Sciences USA* **112**, 10611-10616 (2015).
9. Keys, T.G. & Aebi, M. Engineering protein glycosylation in prokaryotes. *Current Opinion in Systems Biology* **5**, 23-31 (2017).
10. Li, H. et al. Optimization of humanized IgGs in glycoengineered *Pichia pastoris*. *Nature Biotechnology* **24**, 210-215 (2006).
11. Yang, Z. et al. Engineered CHO cells for production of diverse, homogeneous glycoproteins. *Nature Biotechnology* **33**, 842-844 (2015).
12. Clausen, H., Wandall, H.H., Steentoft, C., Stanley, P. & Schnaar, R.L. in *Essentials of Glycobiology*. (eds. rd et al.) 713-728 (Cold Spring Harbor Laboratory Press, Cold Spring Harbor (NY); 2015).
13. Wang, L.-X. & Amin, M.N. Chemical and Chemoenzymatic Synthesis of Glycoproteins for Deciphering Functions. *Chemistry & Biology* **21**, 51-66 (2014).
14. Rich, J.R. & Withers, S.G. Emerging methods for the production of homogeneous human glycoproteins. *Nature Chemical Biology* **5**, 206-215 (2009).
15. Wang, L.-X. & Davis, B.G. Realizing the promise of chemical glycobiology. *Chemical Science* **4**, 3381-3394 (2013).
16. Valderrama-Rincon, J.D. et al. An engineered eukaryotic protein glycosylation pathway in *Escherichia coli*. *Nature Chemical Biology* **8**, 434-436 (2012).
17. Wild, R. et al. Structure of the yeast oligosaccharyltransferase complex gives insight into eukaryotic N-glycosylation. *Science* **359**, 545-550 (2018).

18. Jaroentomeechai, T. et al. Single-pot glycoprotein biosynthesis using a cell-free transcription-translation system enriched with glycosylation machinery. *Nature Communications* **9**, 2686 (2018).
19. Schoborg, J.A. et al. A cell-free platform for rapid synthesis and testing of active oligosaccharyltransferases. *Biotechnology and Bioengineering* (2017).
20. Guarino, C. & DeLisa, M.P. A prokaryote-based cell-free translation system that efficiently synthesizes glycoproteins. *Glycobiology* **22**, 596-601 (2012).
21. Keys, T.G. et al. A biosynthetic route for polysialylating proteins in *Escherichia coli*. *Metabolic Engineering* **44**, 293-301 (2017).
22. Cuccui, J. et al. The N-linking glycosylation system from *Actinobacillus pleuropneumoniae* is required for adhesion and has potential use in glycoengineering. *Open Biology* **7** (2017).
23. Natarajan, A., Jaroentomeechai, T., Li, M., Glasscock, C.J. & DeLisa, M.P. Metabolic engineering of glycoprotein biosynthesis in bacteria. *Emerging Topics in Life Sciences*, ETLS20180004 (2018).
24. Schwarz, F., Fan, Y.-Y., Schubert, M. & Aebi, M. Cytoplasmic N-Glycosyltransferase of *Actinobacillus pleuropneumoniae* Is an Inverting Enzyme and Recognizes the NX(S/T) Consensus Sequence. *Journal of Biological Chemistry* **286**, 35267-35274 (2011).
25. Naegeli, A. et al. Molecular analysis of an alternative N-glycosylation machinery by functional transfer from *Actinobacillus pleuropneumoniae* to *Escherichia coli*. *Journal of Biological Chemistry* **289**, 2170-2179 (2014).
26. Kightlinger, W. et al. Design of glycosylation sites by rapid synthesis and analysis of glycosyltransferases. *Nature Chemical Biology* **14**, 627-635 (2018).
27. Lomino, J.V. et al. A two-step enzymatic glycosylation of polypeptides with complex N-glycans. *Bioorganic & Medicinal Chemistry* **21**, 2262-2270 (2013).
28. Song, Q. et al. Production of homogeneous glycoprotein with multi-site modifications by an engineered N-glycosyltransferase mutant. *Journal of Biological Chemistry* (2017).
29. Xu, Y. et al. A novel enzymatic method for synthesis of glycopeptides carrying natural eukaryotic N-glycans. *Chemical Communications* **53**, 9075-9077 (2017).
30. Carlson, E.D., Gan, R., Hodgman, C.E. & Jewett, M.C. Cell-free protein synthesis: applications come of age. *Biotechnology Advances* **30**, 1185-1194 (2012).
31. Dudley, Q.M., Karim, A.S. & Jewett, M.C. Cell-free metabolic engineering: Biomanufacturing beyond the cell. *Biotechnology Journal* **10**, 69-82 (2015).
32. Martin, R.W. et al. Cell-free protein synthesis from genomically recoded bacteria enables multisite incorporation of noncanonical amino acids. *Nature Communications* **9**, 1203 (2018).
33. Karim, A.S. & Jewett, M.C. A cell-free framework for rapid biosynthetic pathway prototyping and enzyme discovery. *Metabolic Engineering* **36**, 116-126 (2016).
34. Dudley, Q.M., Anderson, K.C. & Jewett, M.C. Cell-Free Mixing of *Escherichia coli* Crude Extracts to Prototype and Rationally Engineer High-Titer Mevalonate Synthesis. *ACS Synthetic Biology* **5**, 1578-1588 (2016).
35. Phanse, Y. et al. A systems approach to designing next generation vaccines: combining alpha-galactose modified antigens with nanoparticle platforms. *Scientific Reports* **4**, 3775 (2014).

36. Bork, K., Horstkorte, R. & Weidemann, W. Increasing the sialylation of therapeutic glycoproteins: The potential of the sialic acid biosynthetic pathway. *Journal of Pharmaceutical Sciences* **98**, 3499-3508 (2009).
37. Ban, L. et al. Discovery of glycosyltransferases using carbohydrate arrays and mass spectrometry. *Nature Chemical Biology* **8**, 769-773 (2012).
38. Dumon, C., Samain, E. & Priem, B. Assessment of the Two *Helicobacter pylori*  $\alpha$ -1,3-Fucosyltransferase Ortholog Genes for the Large-Scale Synthesis of LewisX Human Milk Oligosaccharides by Metabolically Engineered *Escherichia coli*. *Biotechnology Progress* **20**, 412-419 (2004).
39. Huang, D. et al. Metabolic engineering of *Escherichia coli* for the production of 2'-fucosyllactose and 3-fucosyllactose through modular pathway enhancement. *Metabolic Engineering* **41**, 23-38 (2017).
40. Li, Y. et al. Donor substrate promiscuity of bacterial beta1-3-N-acetylglucosaminyltransferases and acceptor substrate flexibility of beta1-4-galactosyltransferases. *Bioorganic and Medicinal Chemistry* **24**, 1696-1705 (2016).
41. Priem, B., Gilbert, M., Wakarchuk, W.W., Heyraud, A. & Samain, E. A new fermentation process allows large-scale production of human milk oligosaccharides by metabolically engineered bacteria. *Glycobiology* **12**, 235-240 (2002).
42. Lindhout, T. et al. Site-specific enzymatic polysialylation of therapeutic proteins using bacterial enzymes. *Proceedings of the National Academy of Sciences* **108**, 7397-7402 (2011).
43. Pan, Y., Chefalo, P., Nagy, N., Harding, C. & Guo, Z. Synthesis and immunological properties of N-modified GM3 antigens as therapeutic cancer vaccines. *Journal of Medicinal Chemistry* **48**, 875-883 (2005).
44. Meuris, L. et al. GlycoDelete engineering of mammalian cells simplifies N-glycosylation of recombinant proteins. *Nature Biotechnology* **32**, 485-489 (2014).
45. Zou, W. et al. Bioengineering of surface GD3 ganglioside for immunotargeting human melanoma cells. *Journal of Biological Chemistry* (2004).
46. Ragupathi, G. et al. Induction of antibodies against GD3 ganglioside in melanoma patients by vaccination with GD3-lactone-KLH conjugate plus immunological adjuvant QS-21. *International Journal of Cancer* **85**, 659-666 (2000).
47. Higuchi, Y. et al. A rationally engineered yeast pyruvyltransferase Pvg1p introduces sialylation-like properties in neo-human-type complex oligosaccharide. *Scientific Reports* **6**, 26349 (2016).
48. Kristian, S.A. et al. Retargeting pre-existing human antibodies to a bacterial pathogen with an alpha-Gal conjugated aptamer. *Journal of Molecular Medicine* **93**, 619-631 (2015).
49. Deguchi, T. et al. Increased Immunogenicity of Tumor-Associated Antigen, Mucin 1, Engineered to Express  $\alpha$ -Gal Epitopes: A Novel Approach to Immunotherapy in Pancreatic Cancer. *Cancer Research* **70**, 5259-5269 (2010).
50. Deriy, L., Ogawa, H., Gao, G.-P. & Galili, U. In vivo targeting of vaccinating tumor cells to antigen-presenting cells by a gene therapy method with adenovirus containing the alpha-1,3galactosyltransferase gene. *Cancer Gene Therapy* **12**, 528-539 (2005).



51. Uzawa, H. et al. A Quartz Crystal Microbalance Method for Rapid Detection and Differentiation of Shiga Toxins by Applying a Monoalkyl Globobioside as the Toxin Ligand. *Biomacromolecules* **3**, 411-414 (2002).
52. Nilsson, K.G.I. & Mandenius, C.-F. A Carbohydrate Biosensor Surface for the Detection of Uropathogenic Bacteria. *Nature Biotechnology* **12**, 1376 (1994).
53. Kitov, P.I. et al. Shiga-like toxins are neutralized by tailored multivalent carbohydrate ligands. *Nature* **403**, 669 (2000).
54. Nonaka, M. & Fukuda, M. in *Glycosignals in Cancer: Mechanisms of Malignant Phenotypes*. (eds. K. Furukawa & M. Fukuda) 141-161 (Springer Japan, Tokyo; 2016).
55. Wilbers, R.H.P. et al. Production and glyco-engineering of immunomodulatory helminth glycoproteins in plants. *Scientific Reports* **7**, 45910-45910 (2017).
56. Yu, H. et al. A Multifunctional *Pasteurella multocida* Sialyltransferase: A Powerful Tool for the Synthesis of Sialoside Libraries. *Journal of the American Chemical Society* **127**, 17618-17619 (2005).
57. Yavuz, E., Maffioli, C., Ilg, K., Aebi, M. & Priem, B. Glycomimicry: display of fucosylation on the lipo-oligosaccharide of recombinant *Escherichia coli* K12. *Glycoconjugate Journal* **28**, 39-47 (2011).
58. Ilg, K., Yavuz, E., Maffioli, C., Priem, B. & Aebi, M. Glycomimicry: display of the GM3 sugar epitope on *Escherichia coli* and *Salmonella enterica* sv Typhimurium. *Glycobiology* **20**, 1289-1297 (2010).
59. Hug, I. et al. Exploiting Bacterial Glycosylation Machineries for the Synthesis of a Lewis Antigen-containing Glycoprotein. *Journal of Biological Chemistry* **286**, 37887-37894 (2011).
60. Pardee, K. et al. Portable, On-Demand Biomolecular Manufacturing. *Cell* **167**, 248-259.e212 (2016).
61. Salehi, A.S. et al. Cell-free protein synthesis of a cytotoxic cancer therapeutic: Onconase production and a just-add-water cell-free system. *Biotechnol Journal* **11**, 274-281 (2016).
62. Adiga, R. et al. Point-of-care production of therapeutic proteins of good-manufacturing-practice quality. *Nature Biomedical Engineering* **2**, 675-686 (2018).
63. Sullivan, C.J. et al. A cell-free expression and purification process for rapid production of protein biologics. *Biotechnology Journal* **11**, 238-248 (2016).
64. Mallajosyula, V.V.A. et al. Influenza hemagglutinin stem-fragment immunogen elicits broadly neutralizing antibodies and confers heterologous protection. *Proceedings of the National Academy of Sciences USA* **111**, E2514-E2523 (2014).
65. Chen, W.A. et al. Addition of alphaGal HyperAcute technology to recombinant avian influenza vaccines induces strong low-dose antibody responses. *PLoS One* **12**, e0182683 (2017).
66. Antoine, T., Heyraud, A., Bosso, C. & Samain, E. Highly Efficient Biosynthesis of the Oligosaccharide Moiety of the GD3 Ganglioside by Using Metabolically Engineered *Escherichia coli*. *Angewandte Chemie International Edition* **44**, 1350-1352 (2005).
67. Jaroentomeechai, T. et al. A Pipeline for Studying and Engineering Single-Subunit Oligosaccharyltransferases. *Methods Enzymology* **597**, 55-81 (2017).

68. Gibson, D.G. et al. Enzymatic assembly of DNA molecules up to several hundred kilobases. *Nature Methods* **6**, 343-345 (2009).
69. Ollis, A.A., Zhang, S., Fisher, A.C. & DeLisa, M.P. Engineered oligosaccharyltransferases with greatly relaxed acceptor-site specificity. *Nature Chemical Biology* **10**, 816-822 (2014).
70. Espah Borujeni, A., Channarasappa, A.S. & Salis, H.M. Translation rate is controlled by coupled trade-offs between site accessibility, selective RNA unfolding and sliding at upstream standby sites. *Nucleic Acids Research* **42**, 2646-2659 (2014).
71. Valentine, Jenny L. et al. Immunization with Outer Membrane Vesicles Displaying Designer Glycotopes Yields Class-Switched, Glycan-Specific Antibodies. *Cell Chemical Biology* **23**, 655-665 (2016).
72. Jewett, M.C. & Swartz, J.R. Mimicking the Escherichia coli cytoplasmic environment activates long-lived and efficient cell-free protein synthesis. *Biotechnology and Bioengineering* **86**, 19-26 (2004).
73. Kim, D.M. & Swartz, J.R. Efficient production of a bioactive, multiple disulfide-bonded protein using modified extracts of Escherichia coli. *Biotechnology and Bioengineering* **85**, 122-129 (2004).
74. Baba, T. et al. Construction of Escherichia coli K-12 in-frame, single-gene knockout mutants: the Keio collection. *Molecular systems biology* **2**, 2006.0008-2006.0008 (2006).
75. St-Pierre, F. et al. One-Step Cloning and Chromosomal Integration of DNA. *ACS Synthetic Biology* **2**, 537-541 (2013).

## Supplementary Information

### A cell-free biosynthesis platform for modular construction of protein glycosylation pathways

Kightlinger et al.

#### Contents:

|                                      |      |
|--------------------------------------|------|
| Supplementary Tables                 | 1-7  |
| Supplementary Figures                | 1-15 |
| Supplementary Note                   | 1    |
| Supplementary Information References |      |

## Supplementary Tables

### Supplementary Table 1: Strains and plasmids used in this study<sup>1-6</sup>.

| Plasmid and Strain          | Relevant Characteristics                                                                                                                             | Source              |
|-----------------------------|------------------------------------------------------------------------------------------------------------------------------------------------------|---------------------|
| <b>Strains</b>              |                                                                                                                                                      |                     |
| DH5- $\alpha$               | <i>fhuA2</i> $\Delta$ ( <i>argF-lacZ</i> )U169 <i>phoA glnV44</i> $\Phi$ 80 $\Delta$ ( <i>lacZ</i> )M15 <i>gyrA96 recA1 relA1 endA1 thi-1 hsdR17</i> | New England Biolabs |
| C321. $\Delta$ A.759        | MG1655 C321 Derivative                                                                                                                               | 1                   |
| CLM24 $\Delta$ <i>nanA</i>  | W3110 $\Delta$ <i>wecA</i> $\Delta$ <i>nanA</i> $\Delta$ <i>waaL::Kan</i>                                                                            | This Study          |
| <b>Plasmids</b>             |                                                                                                                                                      |                     |
| pJL1.sfGFP                  | Kan <sup>R</sup> , <i>P</i> <sub>T7</sub> , super folder green fluorescent protein (sfGFP), C-term strep-tag                                         | 2                   |
| pJL1.NGT                    | <i>A. pleuroneumoniae</i> NGT, (NGT_ACTP2)                                                                                                           | 3                   |
| pJL1.AGT                    | <i>A. pleuroneumoniae</i> $\alpha$ 1-6 GlcT, (GTF_ACTP7)                                                                                             | 3                   |
| pJL1.Im7-6                  | <i>E. coli</i> Im7, (IMM7_ECOLX), 26_31=ATTGGNWTAGG, C-term 6xHis-tag                                                                                | 3                   |
| pJL1.Fc-6                   | <i>H. sapiens</i> Fc, IGHG1_HUMAN, Q178_Y183=ATTGGNWTAGG, $\Delta$ 1_98, C-term 6xHis-                                                               | 3                   |
| PJL1.BfGalNAcT              | Q5LJ88_BACFN                                                                                                                                         | This Study          |
| PJL1.Hp $\beta$ 4GalT       | D0IS16_HELP1                                                                                                                                         | This Study          |
| PJL1.NmLgtB                 | LGTB_NEIMB                                                                                                                                           | This Study          |
| PJL1.B $\beta$ 4GalT        | B4GT1_BOVIN, N-term Strep-tag                                                                                                                        | This Study          |
| PJL1.NgLgtB                 | Q5F4Y6_NEIG1                                                                                                                                         | This Study          |
| PJL1.SpwhcJ                 | Q4K235_STREE                                                                                                                                         | This Study          |
| PJL1.SpwhcK                 | Q4K234_STREE                                                                                                                                         | This Study          |
| PJL1.NmLgtC                 | Q93EK7_NEIME                                                                                                                                         | This Study          |
| PJL1.HsSIAT1                | SIAT1_HUMAN                                                                                                                                          | This Study          |
| PJL1.PmST3,6                | Q15KI8_PASMD, N-Term CAT_Strep-tag_Linkers=CSL                                                                                                       | This Study          |
| PJL1.CjCST-I                | Q9RGF1_CAMJU, N-term CSL                                                                                                                             | This Study          |
| PJL1.CjCST-II               | Q9LAK3_CAMJU, N-term CSL                                                                                                                             | This Study          |
| PJL1.SpPvg1                 | PVG1_SCHPO, N-term CSL                                                                                                                               | This Study          |
| PJL1.VsST3                  | A8R0Y0_9VIBR, N-term CSL                                                                                                                             | This Study          |
| PJL1.HpFutA                 | FUCT_HELPX, $\Delta$ 363_478, C-term Strep-tag                                                                                                       | This Study          |
| PJL1.HpFutC                 | A0A1V0EFK2_HELPX, N-term CSL                                                                                                                         | This Study          |
| PJL1.BtGGTA                 | GGTA1_BOVIN, $\Delta$ 1_80                                                                                                                           | This Study          |
| PJL1.HdGlcNAcT              | Q8GNC0_HAEDC                                                                                                                                         | This Study          |
| PJL1.NgLgtA                 | LgtA_NP274923.1                                                                                                                                      | This Study          |
| PJL1.PdST6                  | O66375_9GAMM, N-term CSL                                                                                                                             | This Study          |
| PJL1.PIST6                  | D0VYB7_PHOLE, N-term CSL                                                                                                                             | This Study          |
| PJL1.PpST3                  | A5LHX0_PHOPO                                                                                                                                         | This Study          |
| PJL1.H1HA10                 | Synthetic Immunogen, N-term His-tag_ATTGGNWTAGG                                                                                                      | This Study          |
| pMAF10.NGT                  | Trimethylprim <sup>R</sup> , P <sub>BAD</sub> , MOB ori, NGT_ACTP2, C-term FLAG-tag                                                                  | 3                   |
| pMAF10.ApNGT.NmLgtB         | NGT_ACTP2, C-term FLAG-tag; LGTB_NEIMB, N-term CSL                                                                                                   | This Study          |
| pMAF10.CjCST-I.NmLgtB.ApNGT | Q9RGF1_CAMJU, N-term CSL; LGTB_NEIMB, N-term CSL; NGT_ACTP2, C-term FLAG-                                                                            | This Study          |
| pMAF10.PdST6.NmLgtB.ApNGT   | O66375_9GAMM, N-term CSL; LGTB_NEIMB, CSL; NGT_ACTP2, C-term FLAG-tag                                                                                | This Study          |
| pBR322.Im7                  | Carb <sup>R</sup> , P <sub>trc</sub> , pBR322 ori, IMM7_ECOLX, C-terminal 6xHis-tag                                                                  | 4                   |
| pBR322.Im7-6                | Im7-6 in pBR322 Vector                                                                                                                               | This Study          |
| pBR322.Fc-6                 | <i>H. sapiens</i> Fc, IGHG1_HUMAN, Q178_Y183=ATTGGNWTAGG, $\Delta$ 1_98, C-term 6xHis-                                                               | This Study          |
| pConYCG                     | CM <sup>R</sup> , P <sub>23109</sub> , rmB Terminator, p15A ori                                                                                      | 5                   |
| pTF                         | pMW07 with galE, pglB, pglA, wbnJ, neuDBAC; Cmr                                                                                                      | 6                   |
| pConNeuA                    | pConYCG, P <sub>23109::P</sub> <sub>23100</sub> (Constitutive), B1LEC0_ECOSM (EcNeuA)                                                                | This Study          |

**Supplementary Table 2: Optimization of cell-free protein synthesis of Im7 target and glycosylation enzymes. (a)** CFPS yields of Im7-6 target and enzymes for *in vitro* glycosylation pathways tested by GlycoPRIME. CFPS yields and errors indicate mean and S.D. from n=3 CFPS reactions quantified by <sup>14</sup>C-leucine incorporation. All CFPS reactions were incubated for 20 h at the indicated temperatures and conditions. Solubility was calculated from quantification of yields in fractions isolated after centrifugation at 12,000xg for 15 mins. Asterisk (\*) indicates yields when CFPS was conducted under oxidizing conditions. Dotted lines indicate if enzymes were used in biosynthetic pathways with one, two, or more than three GTs. Yields under optimized conditions also shown in **Figs. 2 and 3**.

| Protein Name | Total Protein Yield in CFPS (μg/mL) |            |            | Protein Solubility in CFPS (%) |          |          | Optimum Temperature (°C) |
|--------------|-------------------------------------|------------|------------|--------------------------------|----------|----------|--------------------------|
|              | 16°C                                | 23°C       | 30°C       | 16°C                           | 23°C     | 30°C     |                          |
| Im7-6        | 107 ± 13                            | 538 ± 26   | 488 ± 51   | 129 ± 30                       | 67 ± 9   | 60 ± 15  | 23                       |
| ApNGT        | 375 ± 41                            | 1420 ± 164 | 1347 ± 208 | 86 ± 11                        | 66 ± 10  | 44 ± 15  | 23                       |
| Apα1-6       | 648 ± 34                            | 1548 ± 155 | 2065 ± 275 | 65 ± 8                         | 57 ± 8   | 32 ± 5   | 23                       |
| NmLgtB       | 240 ± 70                            | 703 ± 50   | 1136 ± 109 | 91 ± 28                        | 89 ± 6   | 59 ± 8   | 23                       |
| Hpβ4GalT     | 339 ± 19                            | 880 ± 129  | 1443 ± 157 | 32 ± 6                         | 3 ± 2    | 4 ± 3    | 16                       |
| Btβ4GalT1    | 222 ± 13                            | 671 ± 39   | 937 ± 120  | 61 ± 6                         | 41 ± 5   | 15 ± 3   | 23                       |
| Btβ4GalT1*   | 187 ± 12                            | 492 ± 76   | 1001 ± 127 | 61 ± 8                         | 31 ± 9   | 15 ± 4   | 23                       |
| NgLgtB       | 447 ± 35                            | 913 ± 36   | 1224 ± 158 | 81 ± 11                        | 97 ± 4   | 89 ± 15  | 30                       |
| SpWchK       | 111 ± 4                             | 365 ± 11   | 625 ± 57   | 68 ± 10                        | 26 ± 3   | 6 ± 1    | 23                       |
| SpWchJ       | 622 ± 24                            | 1814 ± 188 | 1774 ± 140 | 24 ± 2                         | 7 ± 1    | 7 ± 1    | 23                       |
| BfGalNAcT    | 169 ± 15                            | 285 ± 20   | 460 ± 77   | 79 ± 12                        | 68 ± 8   | 55 ± 18  | 23                       |
| BtGGTA       | 247 ± 8                             | 790 ± 16   | 1179 ± 100 | 66 ± 7                         | 20 ± 3   | 30 ± 5   | 30                       |
| NmLgtC       | 125 ± 39                            | 270 ± 67   | 458 ± 16   | 105 ± 44                       | 81 ± 25  | 101 ± 16 | 30                       |
| HdGlcNAcT    | 126 ± 24                            | 377 ± 25   | 772 ± 131  | 87 ± 21                        | 37 ± 4   | 15 ± 4   | 23                       |
| PsPvg1       | 170 ± 9                             | 662 ± 8    | 1600 ± 55  | 89 ± 8                         | 36 ± 1   | 11 ± 2   | 23                       |
| HpFutA       | 575 ± 10                            | 1670 ± 133 | 1852 ± 168 | 39 ± 4                         | 34 ± 4   | 33 ± 8   | 23                       |
| NgLgtA       | 487 ± 13                            | 1199 ± 72  | 2076 ± 36  | 84 ± 9                         | 62 ± 5   | 55 ± 2   | 30                       |
| PdST6        | 242 ± 31                            | 804 ± 48   | 1274 ± 136 | 98 ± 15                        | 86 ± 10  | 68 ± 12  | 23                       |
| HsSIAT1      | 175 ± 21                            | 770 ± 92   | 928 ± 129  | 34 ± 18                        | 3 ± 3    | 5 ± 3    | 16                       |
| HsSIAT1*     | 506 ± 49                            | 674 ± 41   | 637 ± 113  | 30 ± 5                         | 18 ± 3   | 13 ± 3   | 16                       |
| PIST6        | 480 ± 58                            | 1063 ± 160 | 1366 ± 31  | 113 ± 26                       | 102 ± 18 | 117 ± 17 | 30                       |
| CjCST-I      | 343 ± 44                            | 649 ± 63   | 1248 ± 93  | 40 ± 6                         | 37 ± 6   | 44 ± 8   | 16                       |
| CjCST-I*     | 147 ± 16                            | 712 ± 54   | 920 ± 61   | 77 ± 12                        | 17 ± 2   | 12 ± 4   | 16                       |
| VsST3        | 247 ± 55                            | 601 ± 80   | 1044 ± 56  | 102 ± 31                       | 86 ± 18  | 105 ± 10 | 30                       |
| PpST3        | 323 ± 50                            | 738 ± 70   | 1146 ± 143 | 135 ± 33                       | 103 ± 22 | 118 ± 16 | 30                       |
| CjCST-II     | 203 ± 33                            | 674 ± 16   | 1285 ± 143 | 103 ± 20                       | 58 ± 8   | 66 ± 11  | 23                       |
| PmST3,6      | 476 ± 65                            | 1252 ± 187 | 2048 ± 201 | 34 ± 7                         | 17 ± 6   | 6 ± 1    | 23                       |
| HpFutC       | 598 ± 48                            | 1557 ± 69  | 1714 ± 60  | 40 ± 7                         | 18 ± 7   | 1 ± 2    | 16                       |

**Supplementary Table 3: Theoretical glycoprotein and glycopeptide masses for Im7-6 glycoforms produced during GlycoPRIME biosynthetic pathway engineering.** Predicted glycosylation structures are based on previously established GT activities shown in **Figs. 2 and 3 and Supplementary Table 4**. Theoretical, neutral, average masses of expected glycoprotein products and theoretical, triply charged, monoisotopic mass-to-charge ratios (m/z) of glycopeptides are shown below. Glycopeptide masses correspond to the only ApNGT glycosylation site within Im7-6 which is contained within the tryptic peptide EATTGGNWTTAGGDVLDVLLLEHFVK. Experimentally observed masses are annotated in deconvoluted intact protein MS and glycopeptide MS/MS spectra.

| Target Protein | Predicted Glycan Structure                          | Biosynthetic Pathway           | Glycoprotein     |        | Glycopeptide    |
|----------------|-----------------------------------------------------|--------------------------------|------------------|--------|-----------------|
|                |                                                     |                                | Theoretical Mass | Charge | Theoretical m/z |
| Im7-6          | None                                                | None                           | 11366.43         | 3      | 877.44          |
| Im7-6          | +Glc                                                | ApNGT                          | 11528.48         | 3      | 931.46          |
| Im7-6          | +Glcβ4Gal                                           | ApNGT+NmLgtB or NgLgtB         | 11690.53         | 3      | 985.47          |
| Im7-6          | +Glcβ3GalNAc                                        | ApNGT+BfGalNAcT                | 11731.67         | 3      | 999.19          |
| Im7-6          | +Glcα6Glc                                           | ApNGT+Apa1-6                   | 11690.53         | 3      | 985.47          |
| Im7-6          | +Glc(α6Glc) <sup>2</sup>                            | ApNGT+Apa1-6                   | 11852.58         | 3      | 1039.49         |
| Im7-6          | +Glc(α6Glc) <sup>3</sup>                            | ApNGT+Apa1-6                   | 12014.63         | 3      | 1093.51         |
| Im7-6          | +Glc(α6Glc) <sup>4</sup>                            | ApNGT+Apa1-6                   | 12176.68         | 3      | 1147.52         |
| Im7-6          | +Glc(α6Glc) <sup>5</sup>                            | ApNGT+Apa1-6                   | 12338.73         | 3      | 1201.54         |
| Im7-6          | +Glc(α6Glc) <sup>6</sup>                            | ApNGT+Apa1-6                   | 12500.78         | 3      | 1255.56         |
| Im7-6          | +Glc(α6Glc) <sup>7</sup>                            | ApNGT+Apa1-6                   | 12662.83         | 3      | 1309.57         |
| Im7-6          | +Glc(α6Glc) <sup>8</sup>                            | ApNGT+Apa1-6                   | 12824.88         | 3      | 1363.59         |
| Im7-6          | +Glc(α6Glc) <sup>9</sup>                            | ApNGT+Apa1-6                   | 12986.93         | 3      | 1417.61         |
| Im7-6          | +Glc(α6Glc) <sup>10</sup>                           | ApNGT+Apa1-6                   | 13148.98         | 3      | 1471.62         |
| Im7-6          | +Glc(α6Glc) <sup>11</sup>                           | ApNGT+Apa1-6                   | 13311.03         | 3      | 1525.64         |
| Im7-6          | +Glc(α6Glc) <sup>12</sup>                           | ApNGT+Apa1-6                   | 13473.08         | 3      | 1579.66         |
| Im7-6          | +Glcβ4GalPyr                                        | ApNGT+NmLgtB+SpPvg1            | 11760.53         | 3      | 1008.81         |
| Im7-6          | +Glcβ4(α3Fuc)Gal                                    | ApNGT+NmLgtB+HpFutA            | 11836.59         | 3      | 1034.16         |
| Im7-6          | +Glcβ4Galα2Fuc                                      | ApNGT+NmLgtB+HpFutC            | 11836.59         | 3      | 1034.16         |
| Im7-6          | +Glcβ4Galα3Gal                                      | ApNGT+NmLgtB+BiGGTA            | 11852.58         | 3      | 1039.49         |
| Im7-6          | +Glcβ4Galα4Gal                                      | ApNGT+NmLgtB+NmLgtC            | 11852.58         | 3      | 1039.49         |
| Im7-6          | +Glcβ4Galβ3GlcNAc                                   | ApNGT+NmLgtB+NmLgtA            | 11893.72         | 3      | 1053.20         |
| Im7-6          | +Glcβ4Galα3Sia                                      | ApNGT+NmLgtB+α2,3SiaT          | 11981.63         | 3      | 1082.50         |
| Im7-6          | +Glcβ4Galα6Sia                                      | ApNGT+NmLgtB+α2,6SiaT          | 11981.63         | 3      | 1082.50         |
| Im7-6          | +Glcβ4Galβ3GlcNAcβ4Gal                              | ApNGT+NmLgtB+NmLgtA            | 12055.77         | 3      | 1107.22         |
| Im7-6          | +Glcβ4Gal(β3GlcNAcβ4Gal) <sup>2</sup>               | ApNGT+NmLgtB+NmLgtA            | 12421.01         | 3      | 1228.97         |
| Im7-6          | +Glcβ4Gal(β3GlcNAcβ4Gal) <sup>3</sup>               | ApNGT+NmLgtB+NmLgtA            | 12786.25         | 3      | 1350.71         |
| Im7-6          | +Glcβ4Gal(β3GlcNAcβ4Gal) <sup>4</sup>               | ApNGT+NmLgtB+NmLgtA            | 13151.49         | 3      | 1472.46         |
| Im7-6          | +Glcβ4Gal(β3GlcNAcβ4Gal) <sup>5</sup>               | ApNGT+NmLgtB+NmLgtA            | 13516.73         | 3      | 1594.21         |
| Im7-6          | +Glcβ4(α3Fuc)Galα2Fuc                               | ApNGT+NmLgtB+FutA+FutC         | 11982.64         | 3      | 1082.85         |
| Im7-6          | +Glc(α3Fuc)β4Galα3Sia                               | ApNGT+NmLgtB+HpFutA+CjCST-I    | 12127.69         | 3      | 1131.19         |
| Im7-6          | +Glcβ4Gal(α2Fuc)α6Sia                               | ApNGT+NmLgtB+HpFutC+PdST6      | 12127.69         | 3      | 1131.19         |
| Im7-6          | +Glcβ4Gal(α3Sia)α6Sia                               | ApNGT+NmLgtB+CjCST-I+PdST6     | 12272.72         | 3      | 1179.54         |
| Im7-6          | +Glcβ4(Galβ3GlcNAcβ4Gal)α2Fuc                       | ApNGT+NmLgtB+HpFutC+NmLgtA     | 12201.83         | 3      | 1155.91         |
| Im7-6          | +Glcβ4(Gal(β3GlcNAcβ4Gal) <sup>2</sup> )α2Fuc       | ApNGT+NmLgtB+HpFutC+NmLgtA     | 12567.07         | 3      | 1277.65         |
| Im7-6          | +Glcβ4(Gal(β3GlcNAcβ4Gal) <sup>3</sup> )α2Fuc       | ApNGT+NmLgtB+HpFutC+NmLgtA     | 12932.31         | 3      | 1399.40         |
| Im7-6          | +Glcβ4(Gal(β3GlcNAcβ4Gal) <sup>4</sup> )α2Fuc       | ApNGT+NmLgtB+HpFutC+NmLgtA     | 13297.55         | 3      | 1521.15         |
| Im7-6          | +Glcβ4(α3Fuc)Galβ3GlcNAc(α3Fuc)β4Gal                | ApNGT+NmLgtB+HpFutA+NmLgtA     | 12347.89         | 3      | 1204.59         |
| Im7-6          | +Glcβ4Gal(α6Sia)β3GlcNAcβ4Galα6Sia                  | ApNGT+NmLgtB+PdST6+NmLgtA      | 12637.96         | 3      | 1301.28         |
| Im7-6          | +Glcβ4Gal(α6Sia)(β3GlcNAcβ4Gal(α6Sia)) <sup>2</sup> | ApNGT+NmLgtB+PdST6+NmLgtA      | 13294.30         | 3      | 1520.06         |
| Im7-6          | +Glcβ4Gal(α6Sia)(β3GlcNAcβ4Gal(α6Sia)) <sup>3</sup> | ApNGT+NmLgtB+PdST6+NmLgtA      | 13950.63         | 3      | 1738.84         |
| Im7-6          | +Glcβ4Galβ3GlcNAcβ4Galα3Sia                         | ApNGT+NmLgtB+CjCST-I+NmLgtA    | 12346.87         | 3      | 1204.25         |
| Im7-6          | +Glcβ4Gal(β3GlcNAcβ4Gal) <sup>2</sup> α3Sia         | ApNGT+NmLgtB+CjCST-I+NmLgtA    | 12712.11         | 3      | 1326.00         |
| Im7-6          | +Glcβ4Gal(β3GlcNAcβ4Gal) <sup>3</sup> α3Sia         | ApNGT+NmLgtB+CjCST-I+NmLgtA    | 13077.35         | 3      | 1447.75         |
| Im7-6          | +Glcβ4Gal(β3GlcNAcβ4Gal) <sup>4</sup> α3Sia         | ApNGT+NmLgtB+CjCST-I+NmLgtA    | 13442.59         | 3      | 1569.49         |
| Im7-6          | +Glcβ4Gal(α6Sia)β3GlcNAc(α3Fuc)β4Gal                | ApNGT+NmLgtB+FutA+PdST6+NmLgtA | 12492.92         | 3      | 1252.94         |
| Im7-6          | +Glcβ4(Galβ3GlcNAcβ4Gal)α2Fucα6Sia                  | ApNGT+NmLgtB+FutC+PdST6+NmLgtA | 12492.92         | 3      | 1252.94         |
| Im7-6          | +Glcβ4(Gal(α6Sia)β3GlcNAcβ4Galα6Sia)α2Fuc           | ApNGT+NmLgtB+FutC+PdST6+NmLgtA | 12784.02         | 3      | 1349.97         |
| Im7-6          | +Glcβ4((Galβ3GlcNAcβ4Gal) <sup>2</sup> α2Fuc)α6Sia  | ApNGT+NmLgtB+FutC+PdST6+NmLgtA | 13149.26         | 3      | 1471.72         |

**Supplementary Table 4: Previously characterized activities of glycosyltransferases used this study<sup>7-23</sup>.** GTs listed below were selected for testing in the GlycoPRIME system based on their previously established activities. Many have also been previously used for biosynthesis of glycolipids or free oligosaccharides, laying the foundation for their testing in the new context of elaborating the *N*-linked glucose installed by ApNGT in this study.

| <b>Enzyme</b>     | <b>Organism</b>            | <b>Previously Characterized Activity</b>          | <b>Reference</b> |
|-------------------|----------------------------|---------------------------------------------------|------------------|
| ApNGT             | <i>A. pleuropneumoniae</i> | $\beta$ Glc $\rightarrow$ Asn                     | 7                |
| Ap $\alpha$ 1-6   | <i>A. pleuropneumoniae</i> | $(\alpha$ 1-6 Glc) <sup>n</sup> $\rightarrow$ Glc | 8                |
| NgLgtB            | <i>N. gonorrhoeae</i>      | $\beta$ 1-4 Gal $\rightarrow$ Glc(Nac)            | 9                |
| Hp $\beta$ 4GalT  | <i>H. pylori</i>           | $\beta$ 1-4 Gal $\rightarrow$ Glc(Nac)            | 10               |
| Bt $\beta$ 4GalT1 | <i>B. taurus</i>           | $\beta$ 1-4 Gal $\rightarrow$ Glc(Nac)            | 11               |
| NmLgtB            | <i>N. meningitidis</i>     | $\beta$ 1-4 Gal $\rightarrow$ Glc(Nac)            | 9                |
| SpWchK            | <i>S. pleuropneumoniae</i> | $\beta$ 1-4 Gal $\rightarrow$ Glc                 | 12               |
| SpWchJ            | <i>S. pleuropneumoniae</i> | WchK enhancer                                     | 12               |
| BfGalNAcT         | <i>B. fragilis</i>         | $\beta$ 1-3 GalNAc $\rightarrow$ Glc              | 13               |
| NgLgtA            | <i>N. gonorrhoeae</i>      | $\beta$ 1-3 GlcNAc $\rightarrow$ Gal              | 14               |
| PsPvg1            | <i>S. pombe</i>            | Pyruvate $\rightarrow$ Gal                        | 16               |
| HpFutA            | <i>H. pylori</i>           | $\alpha$ 1-3 Fuc $\rightarrow$ Glc(Nac)           | 15               |
| HpFutC            | <i>H. pylori</i>           | $\alpha$ 1-2 Fuc $\rightarrow$ Gal                | 17               |
| NmLgtC            | <i>N. meningitidis</i>     | $\alpha$ 1-4 Gal $\rightarrow$ Gal                | 17               |
| BtGGTA            | <i>B. taurus</i>           | $\alpha$ 1-3 Glc $\rightarrow$ Glc                | 18               |
| HsSIAT1           | <i>H. sapiens</i>          | $\alpha$ 2-6 Sia $\rightarrow$ Gal                | 19               |
| PdST6             | <i>B. taurus</i>           | $\alpha$ 2-6 Sia $\rightarrow$ Gal                | 20               |
| PIST6             | <i>P. leiognathi</i>       | $\alpha$ 2-6 Sia $\rightarrow$ Gal                | 21               |
| PmST3,6           | <i>P. multocida</i>        | $\alpha$ 2-3,6 Sia $\rightarrow$ Gal              | 21               |
| VsST3             | <i>V. sp. JT-FAJ-16</i>    | $\alpha$ 2-3 Sia $\rightarrow$ Gal                | 21               |
| PpST3             | <i>P. phosphoreum</i>      | $\alpha$ 2-3 Sia $\rightarrow$ Gal                | 21               |
| CjCST-I           | <i>C. jejuni</i>           | $\alpha$ 2-3 Sia $\rightarrow$ Gal                | 21               |
| CjCST-II          | <i>C. jejuni</i>           | $\alpha$ 2-3,8 Sia $\rightarrow$ Gal              | 22               |
| HdGlcNAcT         | <i>H. ducreyi</i>          | $\beta$ 1-3 GlcNAc $\rightarrow$ Gal              | 23               |

**Supplementary Table 5: Theoretical masses of sugar fragment ions detected in glycopeptide MS/MS spectra.** During MS/MS fragmentation of glycopeptides, diagnostic sugar ions were detected. Theoretical mass to charge ratios of these sugar ions are shown below. All calculations of theoretical m/z assume singly charged ions. All mentions of sialic acid (Sia) in this article refer to *N*-Acetylneuraminic acid (NeuAc).

| <b>Sugar Structure</b>    | <b>Theoretical m/z</b> |
|---------------------------|------------------------|
| HexNAc                    | 204.20                 |
| Sia-H <sub>2</sub> O      | 274.09                 |
| Sia                       | 292.10                 |
| Hex <sup>2</sup>          | 325.11                 |
| HexNAc+Hex                | 366.25                 |
| Hex+Sia                   | 454.15                 |
| Hex <sup>3</sup>          | 487.16                 |
| HexNAc+Hex+Fuc            | 512.31                 |
| Sia <sup>2</sup>          | 583.20                 |
| Hex <sup>4</sup>          | 649.21                 |
| HexNAc+Hex+Sia            | 657.34                 |
| (HexNAc+Hex) <sup>2</sup> | 731.49                 |
| HexNAc+Hex+Fuc+Sia        | 803.40                 |
| (HexNAc+Hex) <sup>3</sup> | 1096.73                |
| (HexNAc+Hex) <sup>4</sup> | 1461.97                |



**Supplementary Table 6: Theoretical glycopeptide masses for H1AH10 synthesized and glycosylated *in vitro*.** Theoretical, doubly charged, monoisotopic mass-to-charge ratios (m/z) of the tryptic peptide containing the *N*-terminal, engineered glycosylation site within H1AH10 which was synthesized and glycosylated a one-pot *in vitro* reaction. Predicted glycosylation structures are based on previously established GT activities shown in **Figs. 2 and 3 and Supplementary Table 4**. Experimentally observed masses are annotated on deconvoluted MS and MS/MS spectra in **Fig. 4 and Supplementary Fig. 14**.

| Target Protein | Glycopeptide Sequence | Predicted Glycan Structure      | Biosynthetic Pathway    | Glycopeptide peptide |                 |
|----------------|-----------------------|---------------------------------|-------------------------|----------------------|-----------------|
|                |                       |                                 |                         | Charge               | Theoretical m/z |
| H1HA10         | ATTGGNWTTAGGK         | None                            | None                    | 2                    | 611.29          |
| H1HA10         | ATTGGNWTTAGGK         | +Glc                            | ApNGT                   | 2                    | 692.32          |
| H1HA10         | ATTGGNWTTAGGK         | +Glc $\beta$ 4Gal               | ApNGT + NmLgtB          | 2                    | 773.34          |
| H1HA10         | ATTGGNWTTAGGK         | +Glc $\beta$ 4Gal $\alpha$ 3Gal | ApNGT + NmLgtB + BtGGTA | 2                    | 854.37          |

**Supplementary Table 7: Theoretical glycoprotein and glycopeptide masses for Fc-6 synthesized and glycosylated in the *E. coli* cytoplasm.** Predicted glycosylation structures are based on previously established GT activities shown in **Figs. 2 and 3 and Supplementary Table 4**. Theoretical, neutral, average masses of expected glycoprotein products and theoretical, triply charged, monoisotopic mass-to-charge ratios (m/z) of glycopeptides are shown below. Glycopeptide masses correspond to the only ApNGT glycosylation site within Fc-6 which is contained within the tryptic peptide EEATTGGNWTTAGGR. Experimentally observed masses are annotated on deconvoluted MS and MS/MS spectra in **Fig. 4 and Supplementary Fig. 15**.

| Target Protein | Predicted Glycan Structure      | Biosynthetic Pathway | Glycoprotein     |        | Glycopeptide    |
|----------------|---------------------------------|----------------------|------------------|--------|-----------------|
|                |                                 |                      | Theoretical Mass | Charge | Theoretical m/z |
| Fc-6           | None                            | None                 | 27509.09         | 2      | 754.34          |
| Fc-6           | +Glc                            | ApNGT                | 27671.14         | 2      | 835.36          |
| Fc-6           | +Glc $\beta$ 4Gal               | ApNGT+NmLgtB         | 27833.19         | 2      | 916.39          |
| Fc-6           | +Glc $\beta$ 4Gal $\alpha$ 3Sia | ApNGT+NmLgtB+CjCST-I | 28124.29         | 2      | 1061.94         |
| Fc-6           | +Glc $\beta$ 4Gal $\alpha$ 6Sia | ApNGT+NmLgtB+PdST6   | 28124.29         | 2      | 1061.94         |

## Supplementary Figures

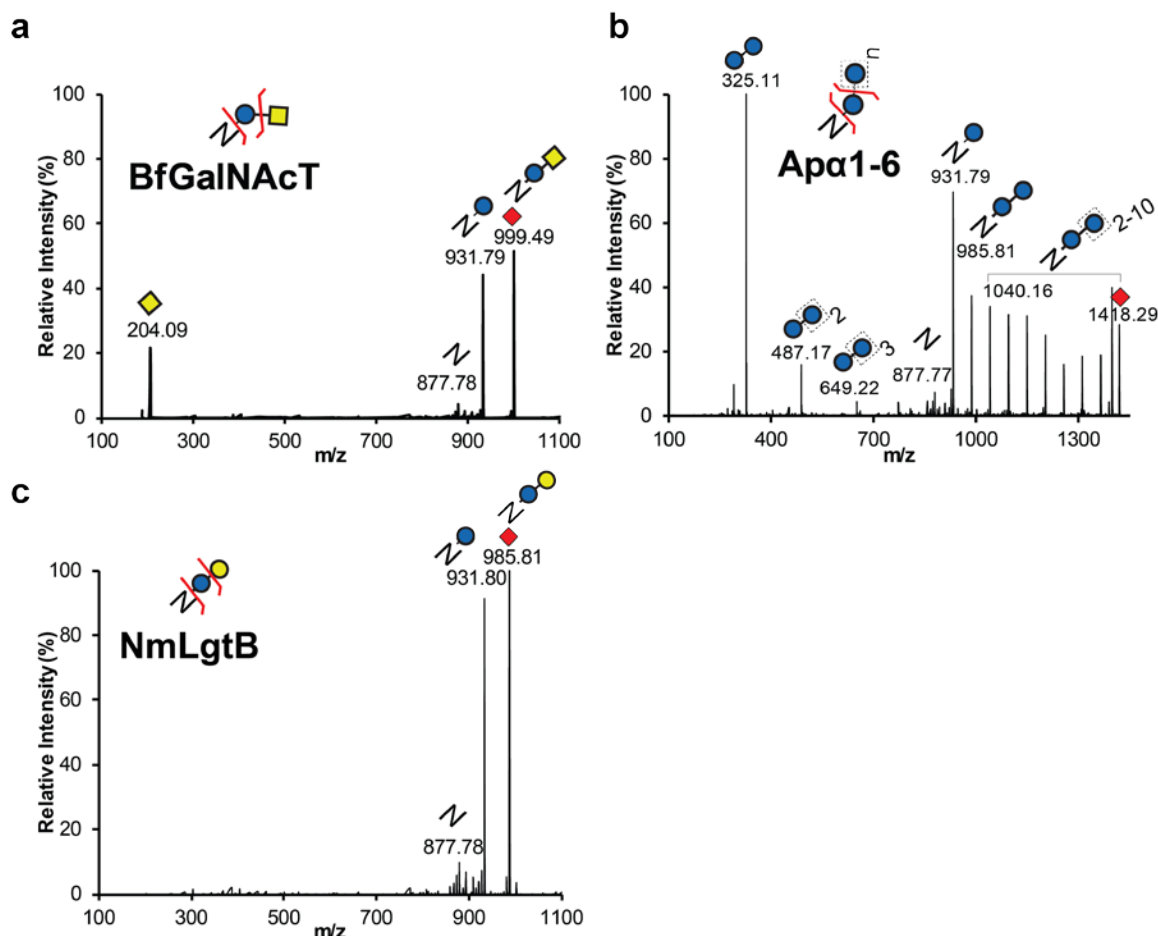

**Supplementary Figure 1: Glycopeptide MS/MS spectra of GlycoPRIME reaction products from two enzyme biosynthetic pathways elaborating *N*-linked glucose.** Products from IVG reactions containing two enzyme pathways modifying Im7-6 shown in **Fig. 2** were purified, trypsinized, and analyzed by pseudo Multiple Reaction Monitoring (MRM) MS/MS fragmentation at theoretical glycopeptide masses (red diamonds) corresponding to detected protein MS peaks using a collisional energy of 30 eV (see **Methods**). Spectra representative of many MS/MS acquisitions from  $n=1$  IVG reaction. Theoretical protein, peptide, and sugar ion masses derived from expected glycosylation structures are shown in **Supplementary Tables 3 and 5**. All indicated sugar ions are singly charged and glycopeptide fragmentation products are triply charged ions consistent with modification of Im7-6 tryptic peptide EATTGGNWTAGGDVLDVLLLEHFVK with indicated sugar structures. **(a)** MS/MS spectra of  $999.49 \pm 2$  m/z corresponding to *N*-linked Glc $\beta$ 1-3GalNAc installed by BfGalNAcT. **(b)** MS/MS spectra of  $1418.29 \pm 2$  m/z corresponding to *N*-linked dextran polymer installed by Ap $\alpha$ 1-6. **(c)** MS/MS spectra of  $985.81 \pm 2$  m/z corresponding with *N*-linked lactose installed by NmLgtB. All IVG reactions contained Im7-6, ApNGT, and appropriate sugar donors according to established enzyme activities (**Supplementary Table 4**).

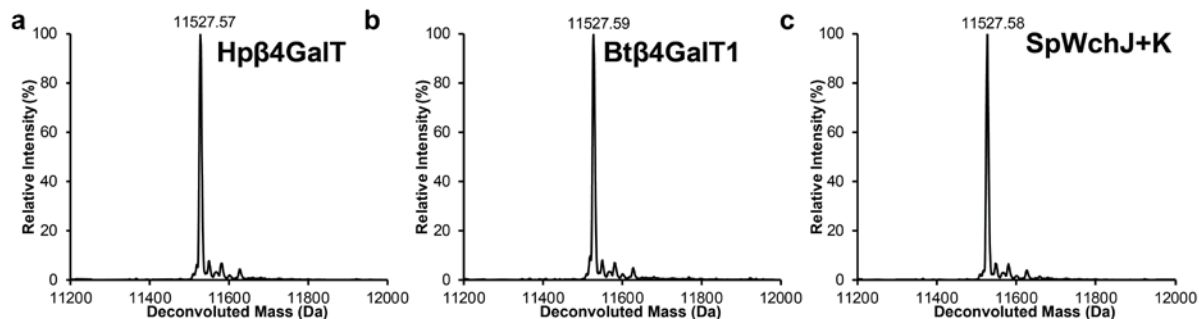

**Supplementary Figure 2: Deconvoluted intact protein MS spectra of IVG reaction products showing no modification of *N*-linked glucose installed by ApNGT.** Products of IVG reactions containing 10  $\mu$ M Im7-6, 0.4  $\mu$ M ApNGT, 2.5 mM of appropriate sugar donors, and one elaborating GT were purified and analyzed by intact protein MS (see **Methods**). **(a)** Deconvoluted intact protein MS spectra of IVG containing 1.3  $\mu$ M of Hp $\beta$ 4GalT. **(b)** Deconvoluted intact protein MS spectra of IVG containing 1.4  $\mu$ M of Bt $\beta$ 4GalT1 supplemented with 10  $\mu$ M  $\alpha$ -lactalbumin and performed under oxidizing conditions (see **Methods**). **(c)** Deconvoluted intact protein MS spectra of IVG containing 1.5  $\mu$ M of SpWchJ and 1.0  $\mu$ M of SpWchK. No peaks were detected that indicated the modification of Im7-6 with *N*-linked glucose installed by ApNGT (theoretical mass values shown in **Supplementary Table 3**). Spectra from *m/z* 100-2000 were deconvoluted into 11,000-14,000 Da using Compass Data Analysis maximum entropy method. Deconvoluted spectra shown here are representative of *n*=2 IVG reactions.

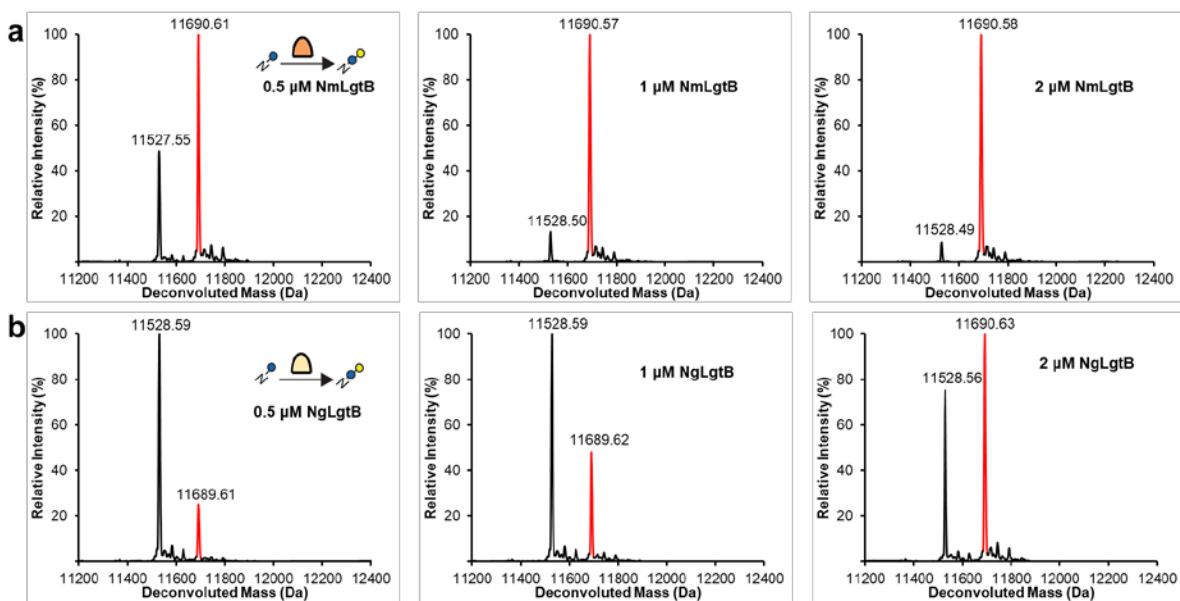

**Supplementary Figure 3: Optimization of LgtB homolog and concentration.** Products of IVG reactions containing 10 μM Im7-6, 0.4 μM ApNGT, 2.5 mM of appropriate sugar donors, and indicated concentrations of NmLgtB or NgLgtB were purified and analyzed by intact protein MS (see **Methods**). **(a)** Deconvoluted intact protein MS spectra from IVG reactions containing indicated concentrations of NmLgtB. **(b)** Deconvoluted intact protein MS spectra from IVG reactions containing indicated concentrations of NgLgtB. Results representative of  $n=2$  IVG reactions conducted for 24 h at 30°C indicate that NmLgtB produced in CFPS has greater specific activity and that nearly homogeneous *N*-linked lactose can be obtained with 2 μM NmLgtB. Theoretical mass values shown in **Supplementary Table 3**. All spectra were acquired from full elution peak areas of all detected glycosylated and aglycosylated Im7-6 species and were deconvoluted from  $m/z$  100-2000 into 11,000-14,000 Da using Compass Data Analysis maximum entropy method.

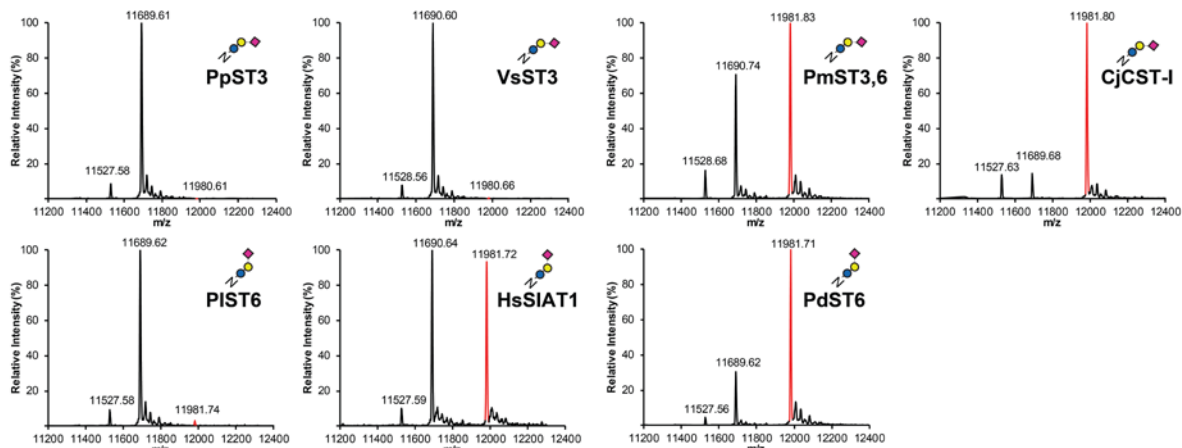

**Supplementary Figure 4: Optimization of sialyltransferase homologs.** Deconvoluted intact protein MS spectra representative of  $n=2$  IVG reactions containing  $0.4 \mu\text{M}$  ApNGT,  $2 \mu\text{M}$  NmLgtB, each sialyltransferase shown in **Fig. 3**, and  $2.5 \text{ mM}$  each of UDP-Glc, UDP-Gal, and CMP-Sia. Lysates enriched with sialyltransferases by CFPS were added with equal volumes to each IVG reaction such that each  $32 \mu\text{l}$ -IVG reaction contained a total of  $25 \mu\text{l}$  of CFPS lysates. These reactions contained  $12.9 \mu\text{M}$  PpST3;  $9.8 \mu\text{M}$  VsST3;  $1.8 \mu\text{M}$  PmST3,6;  $1.3 \mu\text{M}$  CjCST-I;  $5.6 \mu\text{M}$  PIST6;  $0.7 \mu\text{M}$  of HsSIAT1; and  $4.9 \mu\text{M}$  PdST6, based on CFPS yields shown in **Supplementary Table 2**. CjCST-I and HsSIAT1 were synthesized in CFPS with oxidizing conditions because they were found to be more active when produced in this way (**Supplementary Fig. 7**). Under the conditions above, the reaction containing PdST6 provided the most efficient conversion to 6'-siallylactose and the reaction containing CjCST-I provided the most efficient conversion to 3'-siallylactose (exoglycosidase digestions to confirm linkages are shown in **Supplementary Fig. 8**). Although only traces amounts appear in PpST6 and VsST3, MS/MS detection and identification shows that these enzymes are functional (**Supplementary Fig. 5**). All spectra were acquired from full elution peak areas of all detected glycosylated and aglycosylated Im7-6 species and were deconvoluted from  $m/z$  100-2000 into 11,000-14,000 Da using Compass Data Analysis maximum entropy method.

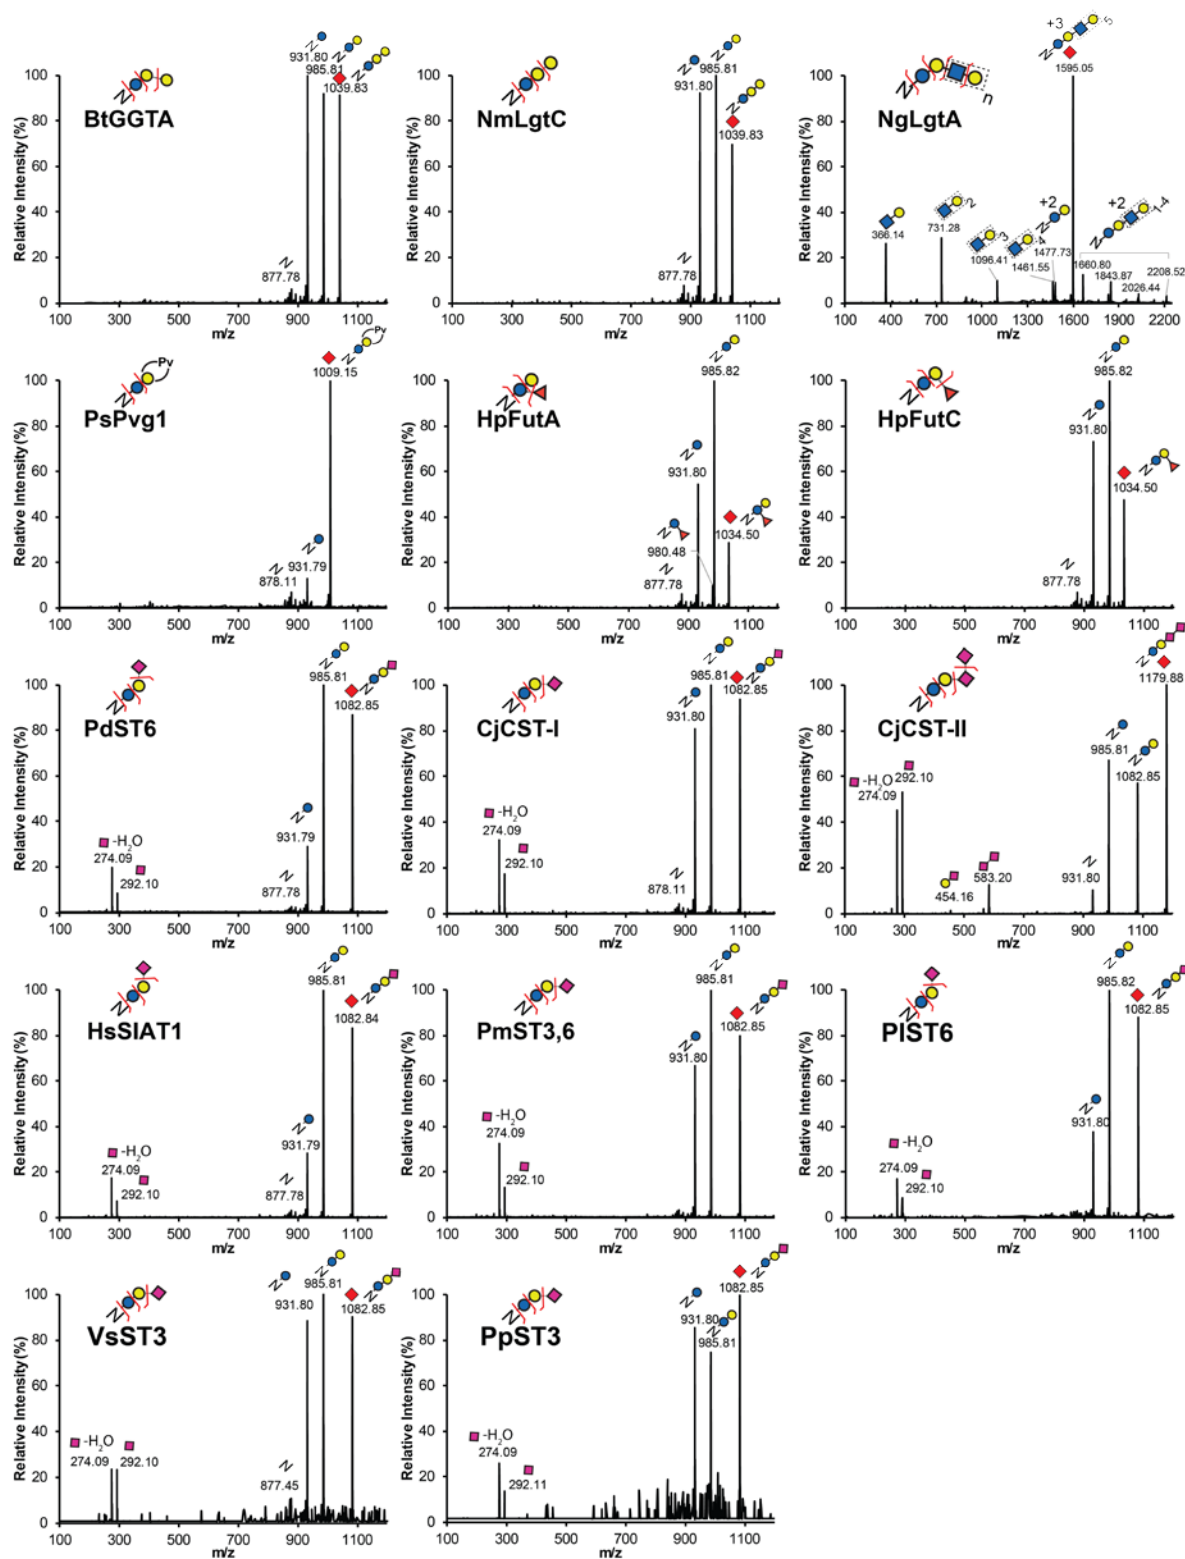

**Supplementary Figure 5: Glycopeptide MS/MS spectra of GlycoPRIME reaction products from three enzyme biosynthetic pathways elaborating *N*-linked lactose. Products from IVG reactions containing three enzyme pathways modifying Im7-6 shown in Fig. 3 were purified,**

trypsinized, and analyzed by pseudo MRM MS/MS fragmentation at theoretical glycopeptide masses (indicated by red diamonds) corresponding to detected protein MS peaks in **Fig. 3 and Supplementary Fig. 4**. All glycopeptides were fragmented using a collisional energy of 30 eV with a window of  $\pm 2$  m/z from targeted m/z values (see **Methods**). Spectra are representative of many MS/MS acquisitions from n=1 IVG reaction. Theoretical protein, peptide, and sugar ion masses derived from expected glycosylation structures are shown in **Supplementary Tables 3 and 5**. All indicated sugar ions are singly charged and glycopeptide fragmentation products are triply charged ions consistent with modification of Im7-6 tryptic peptide EATTGGNWTTAGGDVLDVLLLEHFVK with indicated sugar structures. Predicted sugar linkages based on previously established GT activities (**Supplementary Table 4**) and exoglycosidase sequencing (**Supplementary Figs. 8 and 9**). All IVG reactions contained Im7-6, ApNGT, NmLgtB, indicated GTs, and appropriate sugar donors according to established GT activities.



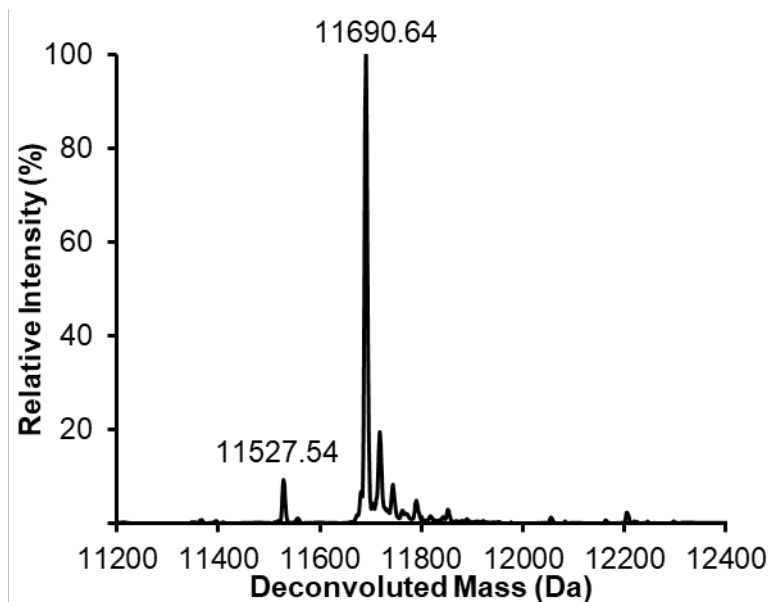

**Supplementary Figure 6: HdGlcNAcT does not modify the *N*-linked lactose substrate installed by ApNGT and NmLgtB.** Deconvoluted intact protein MS spectra of IVG reaction product containing 10  $\mu$ M Im7-6, 0.4  $\mu$ M ApNGT, 2  $\mu$ M NmLgtB, 1.5  $\mu$ M HdGlcNAcT, and 2.5 mM of UDP-Glc, UDP-Gal, and UDP-GlcNAc. No peaks were detected that indicated the modification of Im7-6 with *N*-linked lactose installed by ApNGT and NmLgtB (see **Supplementary Table 3** for theoretical mass values). Deconvoluted spectra representative of  $n=2$  IVG reactions.

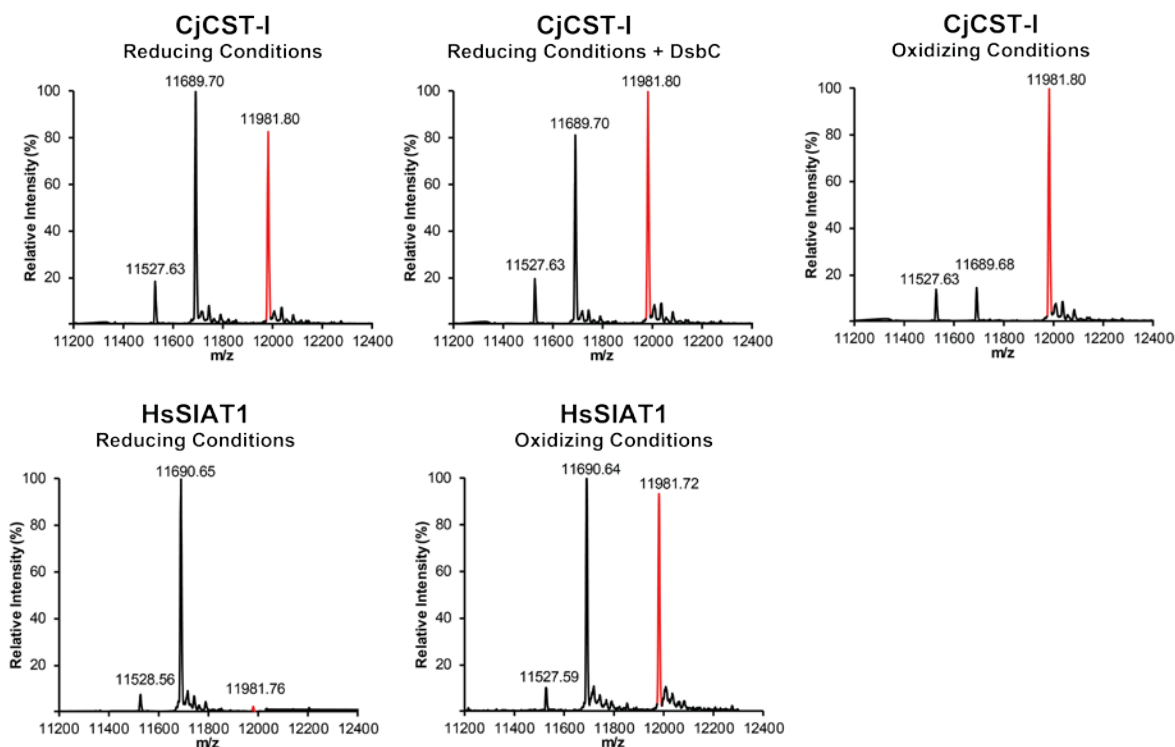

**Supplementary Figure 7: CjCST-I and HsSIAT1 exhibit greater activity when produced in oxidizing conditions.** Deconvoluted intact protein MS spectra representative of  $n=2$  IVG reaction products containing  $10\ \mu\text{M}$  Im7-6,  $0.4\ \mu\text{M}$  ApNGT,  $2\ \mu\text{M}$  NmLgtB,  $2.5\ \text{mM}$  of UDP-Glc, UDP-Gal, and CMP-Sia as well as CjCST-I or HsSIAT1 made in CFPS conducted under oxidizing conditions, reducing conditions with supplemented the *E. coli* disulfide bond isomerase (DsbC), or standard reducing conditions (see **Methods**). CFPS conditions are known to create a protein synthesis environment conducive to disulfide bond formation as previously described<sup>24</sup>. Lysates enriched with sialyltransferases by CFPS were added in equal volumes. Therefore, reducing reaction conditions contained  $1.9\ \mu\text{M}$  of CjCST-I or  $3.8\ \mu\text{M}$  of HsSIAT1 while oxidizing reaction conditions reactions contained  $1.3\ \mu\text{M}$  of CjCST-I and  $0.7\ \mu\text{M}$  of HsSIAT1 (detailed CFPS yield information shown in **Supplementary Fig. 2**). Aside from CFPS synthesis conditions for the CjCST-I and HsSIAT1, IVG reactions were performed identically without ensuring an oxidizing environment for glycosylation. Im7-6, ApNGT, and NmLgtB were produced with standard CFPS reaction conditions. Relative glycosylation efficiencies indicate that the oxidizing CFPS environment of CFPS allows for greater enzyme activities per unit of CFPS reaction volume and per  $\mu\text{M}$  of enzyme. This observation makes sense for HsSIAT1 which is normally active in the oxidizing environment of the human golgi and is known to contain disulfide bonds. Interestingly, an oxidizing synthesis environment also seems to benefit the activity of CjCST-I which does not contain disulfide bonds. However, the increased activity of CjCST-I cannot be explained by the general chaperone activity of DsbC.

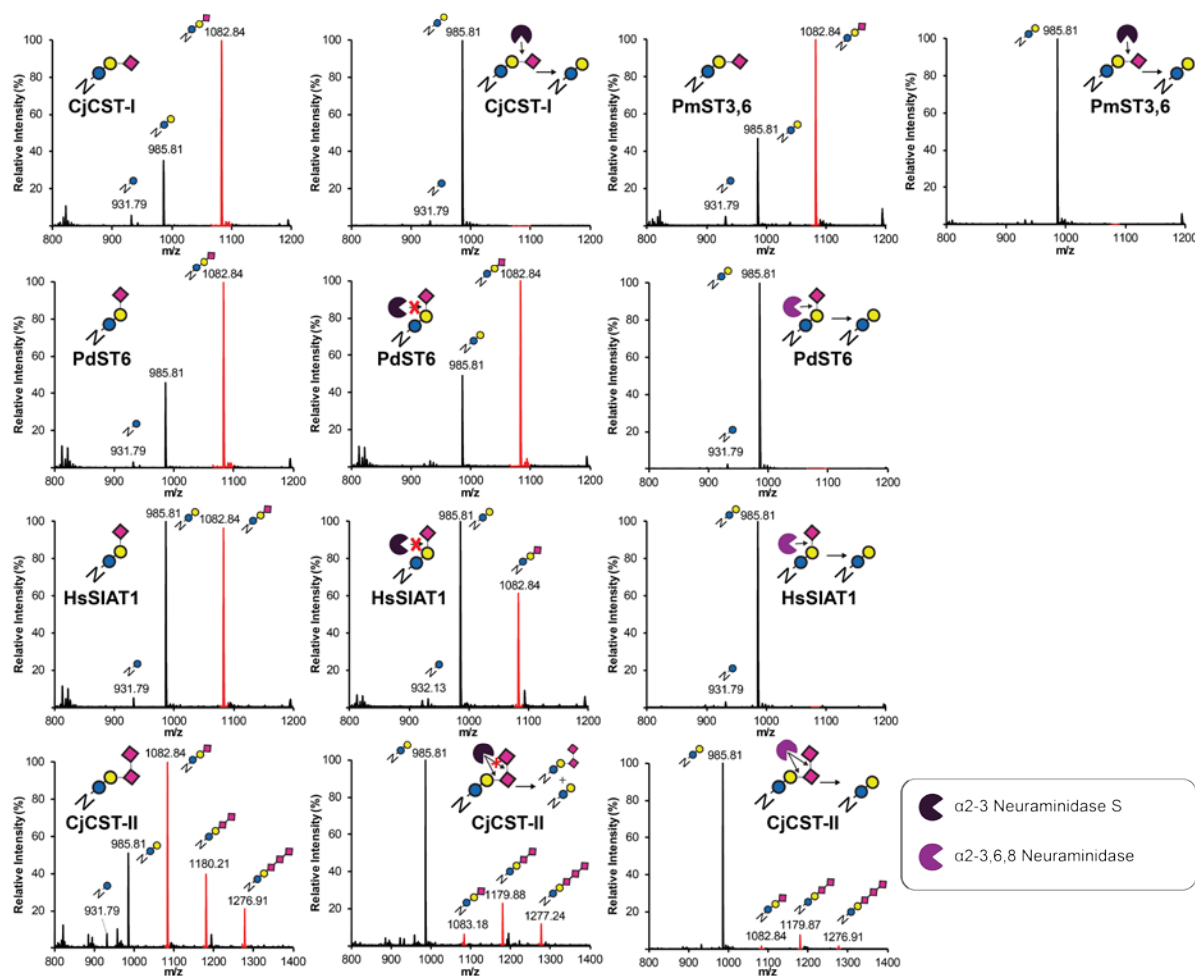

**Supplementary Figure 8: Exoglycosidase sequencing of Im7-6 modified by GlycoPRIME biosynthetic pathways containing sialic acids.** Completed IVG reactions from the GlycoPRIME workflow where purified using Ni-NTA magnetic beads, incubated at 37°C for at least 4 h with and without indicated commercially available exoglycosidases, trypsinized overnight, and then analyzed by glycopeptide LC-MS. The  $\alpha$ 2-3 Neuraminidase S was able to remove the sialic acids installed by CjCST-I; PmST3,6; and the first sialic acid installed by CjCST-II, indicating that these enzymes were installed sialic acids with  $\alpha$ 2-3 linkages. Sialic acids installed by PdST6, HsSIAT1, as well as the second and third sialic acids installed by CjCST-II were resistant to digestion by  $\alpha$ 2-3 Neuraminidase S but were susceptible to cleavage by an  $\alpha$ 2-3,6,8 Neuraminidase which is consistent with the established  $\alpha$ 2-6 activity of PdST6 and HsSIAT1 and the  $\alpha$ 2,8 linkages installed by CjCST-II in subsequent sialic acid additions. See **Methods** section for exoglycosidase details. All spectra were acquired from full elution peak areas of all detected glycosylated and aglycosylated species of the Im7-6 tryptic peptide EATTGGNWTTAGGDVLDVLLLEHFVK containing an ApNGT glycosylation acceptor sequence. All indicated glycopeptide products are triply charged ions consistent with this Im7-6 tryptic peptide modified with indicated sugar structures.

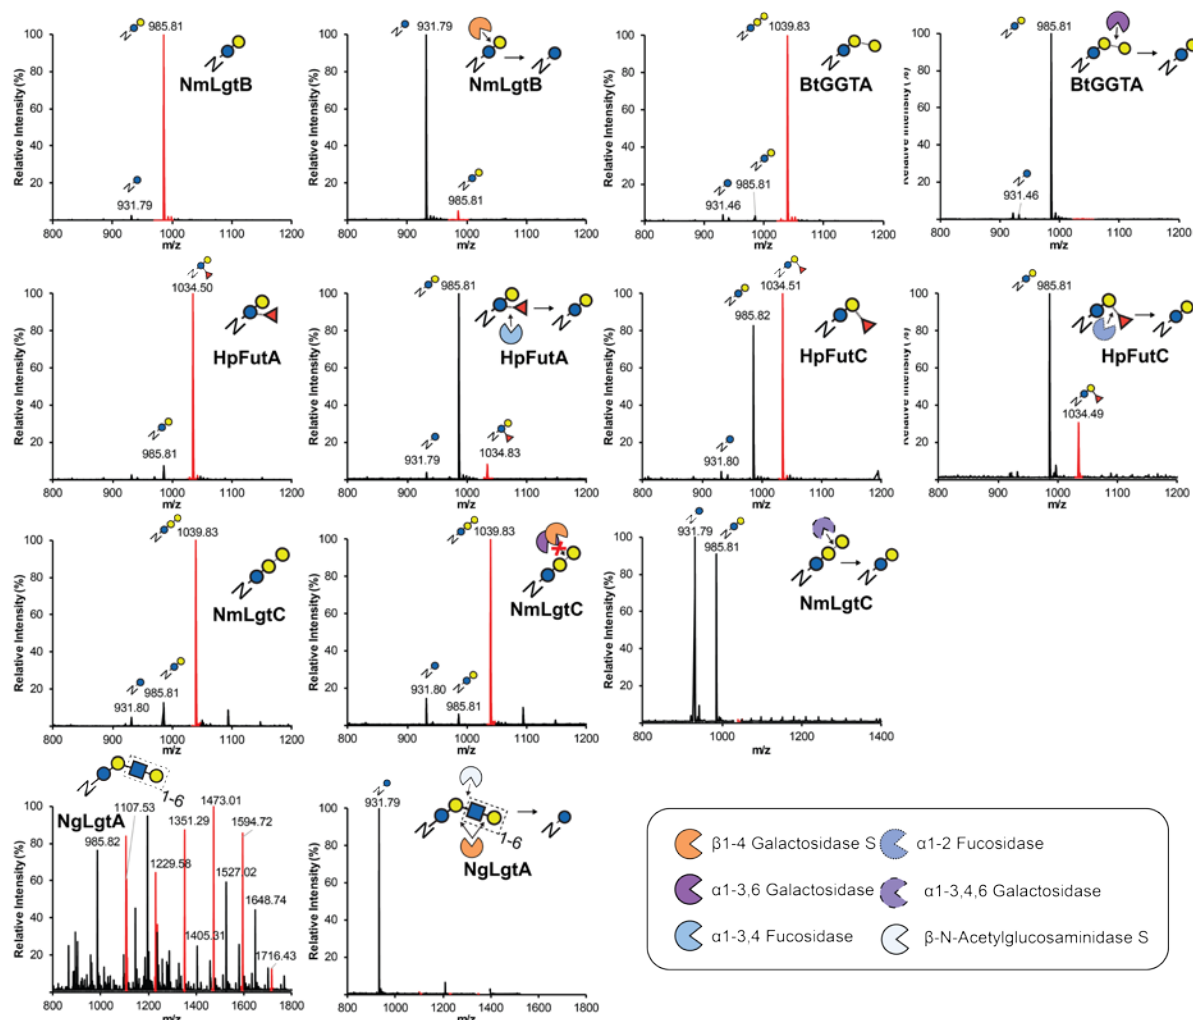

**Supplementary Figure 9: Exoglycosidase sequencing of Im7-6 modified by GlycoPRIME biosynthetic pathways not containing sialic acids.** Completed IVG reactions from the GlycoPRIME workflow where purified using Ni-NTA magnetic beads, incubated at 37°C for at least 4 h with and without indicated commercially available exoglycosidases, trypsinized overnight, and then analyzed by glycopeptide LC-MS. The sugars installed by NmLgtB, BtGGTA, HpFutA, and HpFutC were susceptible to cleavage by commercially available  $\beta$ 1-4 Galactosidase S;  $\alpha$ 1-3,6 Galactosidase;  $\alpha$ 1-3,4 Fucosidase; and  $\alpha$ 1-2 Fucosidase, respectively. The galactose installed by NmLgtC was resistant to cleavage by  $\beta$ 1-4 Galactosidase S and  $\alpha$ 1-3,6 Galactosidase, but susceptible to cleavage by  $\alpha$ 1-3,4,6 Galactosidase. The LacNAc polymer installed by alternating activities by NmLgtB and NgLgtA was susceptible to cleavage by a mixture of  $\beta$ 1-4 Galactosidase S and the  $\beta$ -N-Acetylglucosaminidase S. All spectra were acquired from full elution peak areas of all detected glycosylated and aglycosylated species of the Im7-6 tryptic peptide EATTGGNWTTAGGDVLDVLLLEHFVK containing an ApNGT glycosylation acceptor sequence. All indicated glycopeptide products are triply charged ions consistent with this Im7-6 tryptic peptide modified with indicated sugar structures. Cleavage observations are consistent with previously established GT activities (Figs. 2-3 and Supplementary Table 4). See Methods section for

exoglycosidase details.

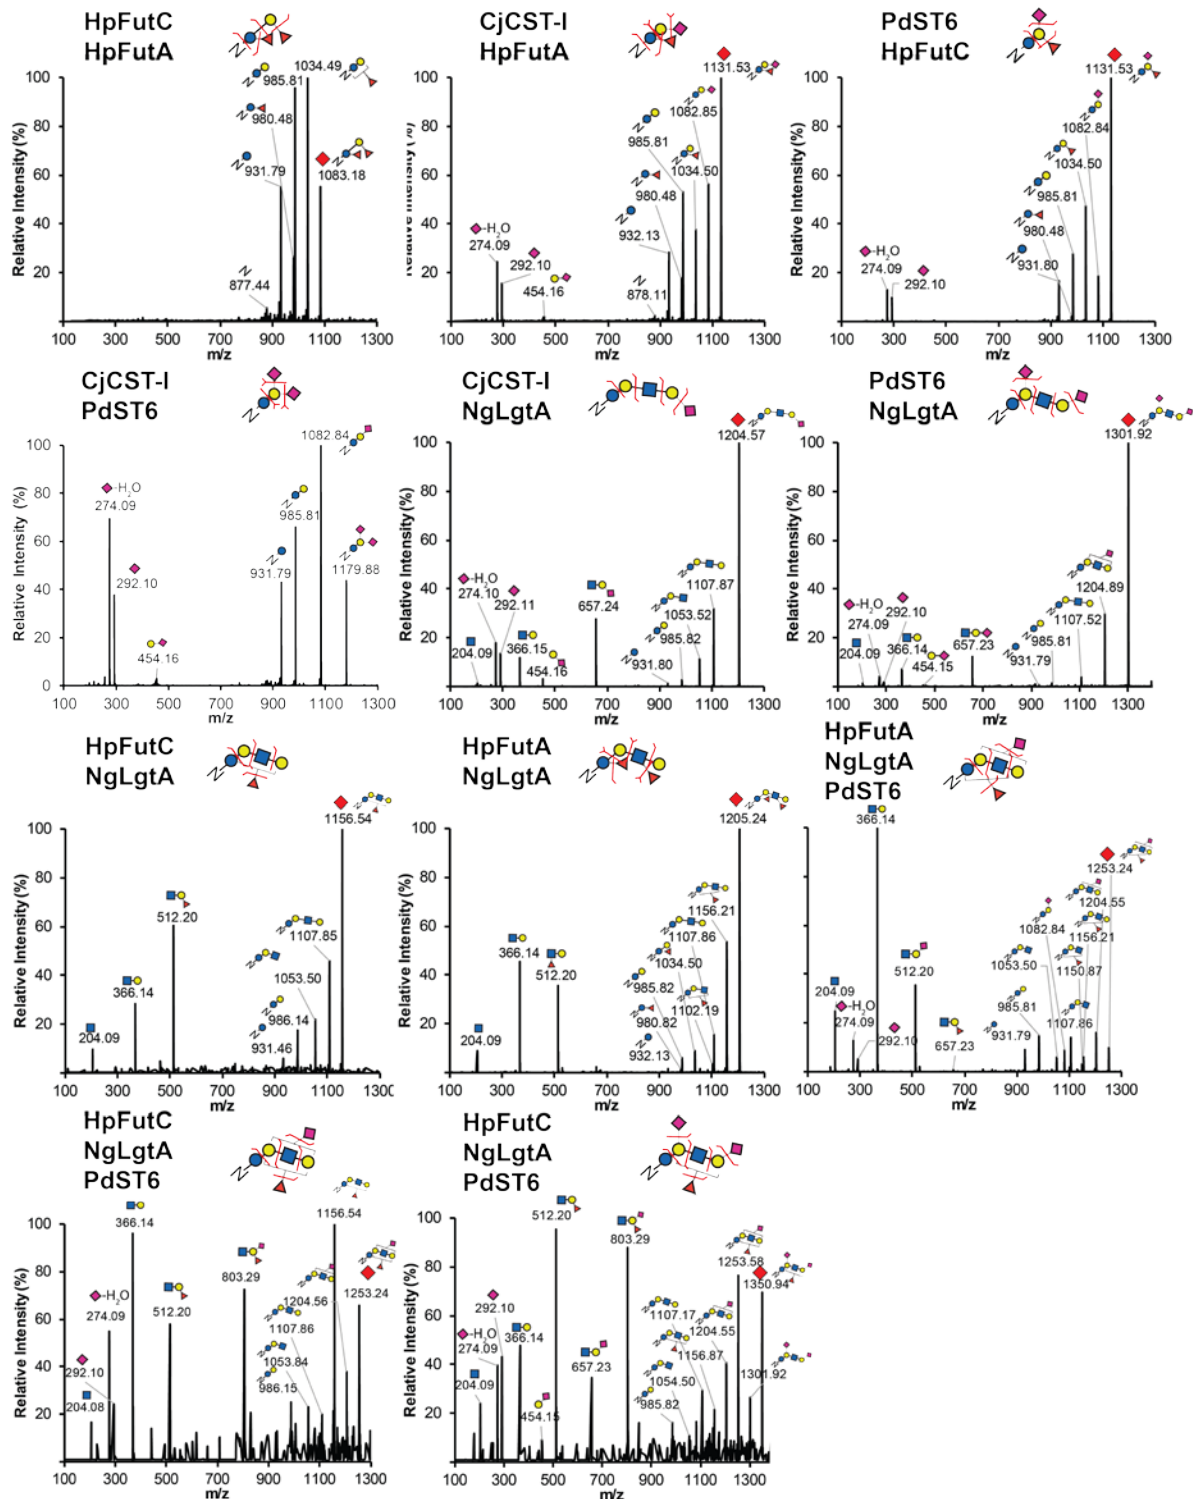

Supplementary Figure 10: Glycopeptide MS/MS spectra of GlycoPRIME reaction products from four and five biosynthetic pathways elaborating *N*-linked lactose. Products

from IVG reactions containing four and five enzyme pathways modifying Im7-6 shown in **Fig. 3d and Supplementary Fig. 12** were purified, trypsinized, and analyzed by pseudo MRM MS/MS fragmentation at theoretical glycopeptide masses (indicated by red diamonds) corresponding to detected protein MS peaks in **Fig. 3d and Supplementary Fig. 12**. All glycopeptides were fragmented using a collisional energy of 30 eV with a window of  $\pm 2$  m/z from targeted m/z values (see **Methods**). Spectra representative of many MS/MS acquisitions from n=1 IVG reaction. Theoretical protein, peptide, and sugar ion masses derived from expected glycosylation structures are shown in **Supplementary Tables 3 and 5**. All indicated sugar ions are singly charged and glycopeptide fragmentation products are triply charged ions consistent with modification of Im7-6 tryptic peptide EATTGGNWTTAGGDVLDVLEHFVK with indicated sugar structures. Predicted sugar linkages based on previously established GT activities (**Supplementary Table 4**). Although products from five-enzyme biosynthetic pathway product could not be unambiguously defined, sugar and glycopeptide fragments do suggest modification with both fucose and sialic acids. All IVG reactions contained Im7-6, ApNGT, NmLgtB, indicated enzymes, and appropriate sugar donors according to established GT activities.

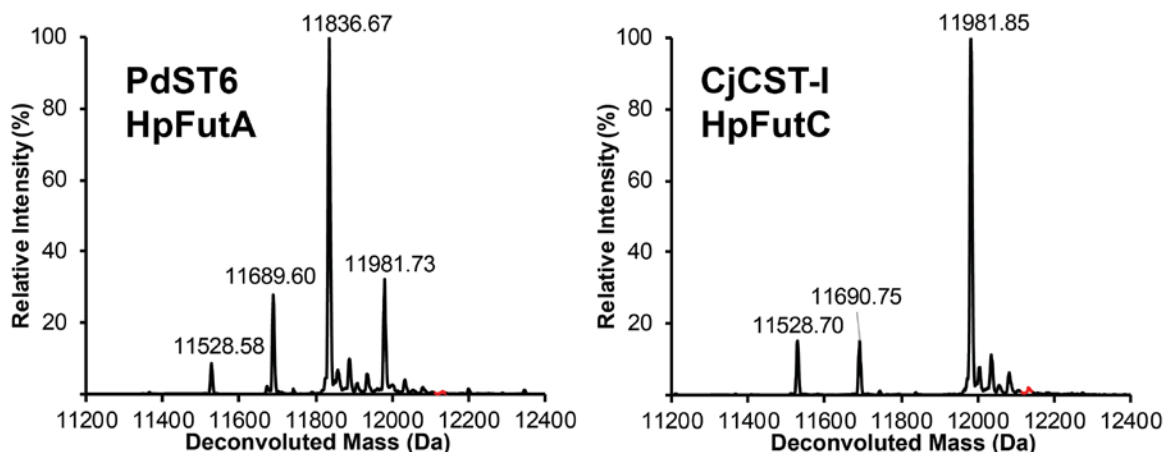

**Supplementary Figure 11: Deconvoluted intact protein MS spectra of IVG reaction products showing no production fucosylated and sialylated species.** Products of IVG reactions containing 10  $\mu\text{M}$  Im7-6, 0.4  $\mu\text{M}$  ApNGT, 2  $\mu\text{M}$  NmLgtB, indicated enzymes, and 2.5 mM of appropriate sugar donors (UDP-Glc, UDP-Gal, CMP-Sia, and GDP-Fuc) were purified and analyzed by intact protein MS. Reactions contained 2.4  $\mu\text{M}$  HpFutA and 2.4  $\mu\text{M}$  PdST6 or 1.3  $\mu\text{M}$  HpFutC and 0.65  $\mu\text{M}$  CjCST-I as indicated. Deconvoluted spectra representative of  $n=2$  IVGs. No peaks were detected that indicated the presence of Im7-6 modified with both a sialic acid and a fucose (the region of the spectra annotated in red line shows expected range of sialylated and fucosylated species) (see **Supplementary Table 4** for theoretical mass values).

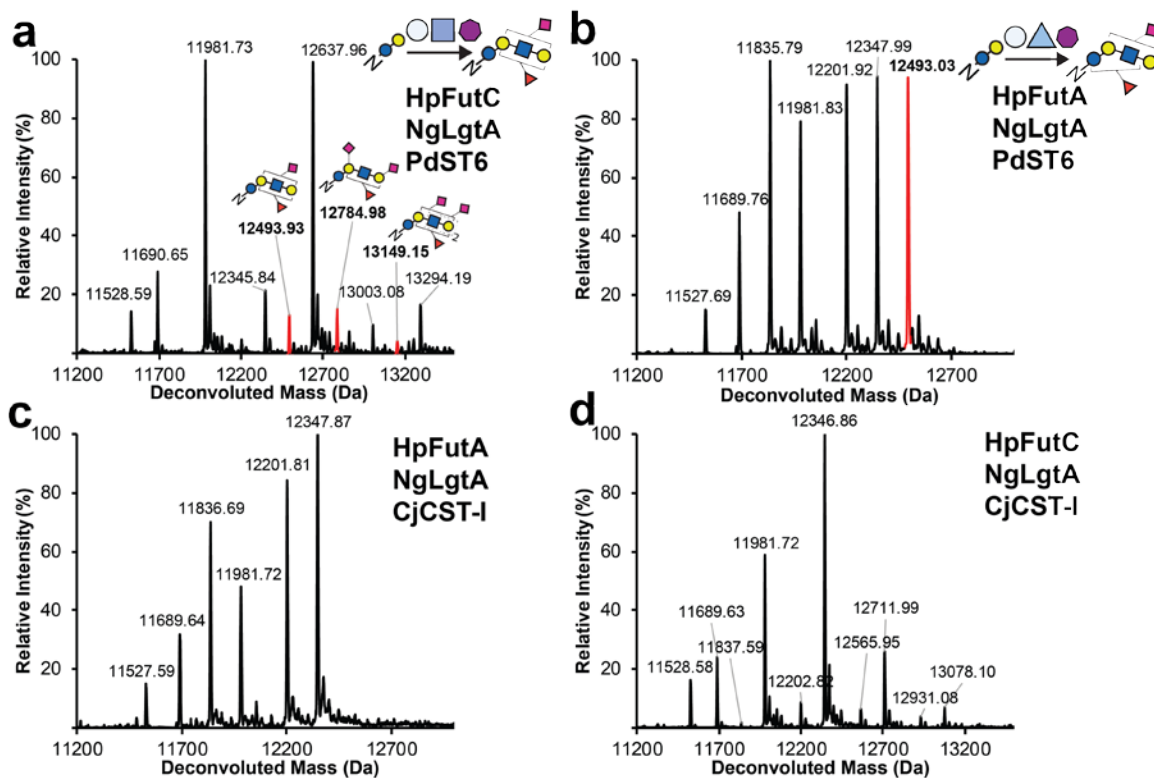

**Supplementary Figure 12: GlycoPRIME screening of biosynthetic pathways containing five enzymes.** Products of IVG reactions containing 10  $\mu\text{M}$  Im7-6, 0.4  $\mu\text{M}$  ApNGT, 2  $\mu\text{M}$  NmLgtB, indicated GTs, and 2.5 mM of appropriate sugar donors (UDP-Glc, UDP-Gal, CMP-Sia, and GDP-Fuc) were purified from and analyzed by intact protein MS. Deconvoluted spectra representative of  $n=2$  IVGs. **(a)** Deconvoluted intact protein MS of IVG reactions containing 0.87  $\mu\text{M}$  HpFutC, 3.83  $\mu\text{M}$  NgLgtA, and 1.63  $\mu\text{M}$  PdST6. **(b)** Deconvoluted intact protein MS of IVG reactions containing 1.63  $\mu\text{M}$  HpFutA, 3.83  $\mu\text{M}$  NgLgtA, and 1.63  $\mu\text{M}$  PdST6 (also shown in **Fig. 3d**) **(c)** Deconvoluted intact protein MS of IVG reactions containing 1.63  $\mu\text{M}$  HpFutA, 3.83  $\mu\text{M}$  NgLgtA, and 0.43  $\mu\text{M}$  CjCST-I. **(d)** Deconvoluted intact protein MS of IVG reactions containing 0.87  $\mu\text{M}$  HpFutC, 3.83  $\mu\text{M}$  NgLgtA, and 0.43  $\mu\text{M}$  CjCST-I. Spectra in **a** and **b** as well as fragmentation spectra in **Supplementary Fig. 10** indicated three and one species, respectively, which contained both sialic acid and fucose. Predicted glycosylation structures based on previously established GT activities (**Supplementary Table 4**) and fragmentation spectra (**Supplementary Fig. 10**). Although structures cannot be unambiguously identified, the previously observed incompatibility of HpFutA and PdST6 as well as the presence of a 1083  $m/z$  ( $\text{Glc}\beta 4\text{Gal}\alpha 6\text{Sia}$ ) and the absence of a 1034  $m/z$  ( $\text{Glc}(\alpha 3\text{Fuc})\beta 4\text{Gal}$ ) peak in fragmentation spectra suggests that in **b** the proximal galactose is modified with a sialic acid while the GlcNAc is modified with the fucose. No peaks in **c** or **d** were detected that indicated the presence of Im7-6 modified with both a sialic acid and a fucose (see **Supplementary Table 3** for theoretical mass values).



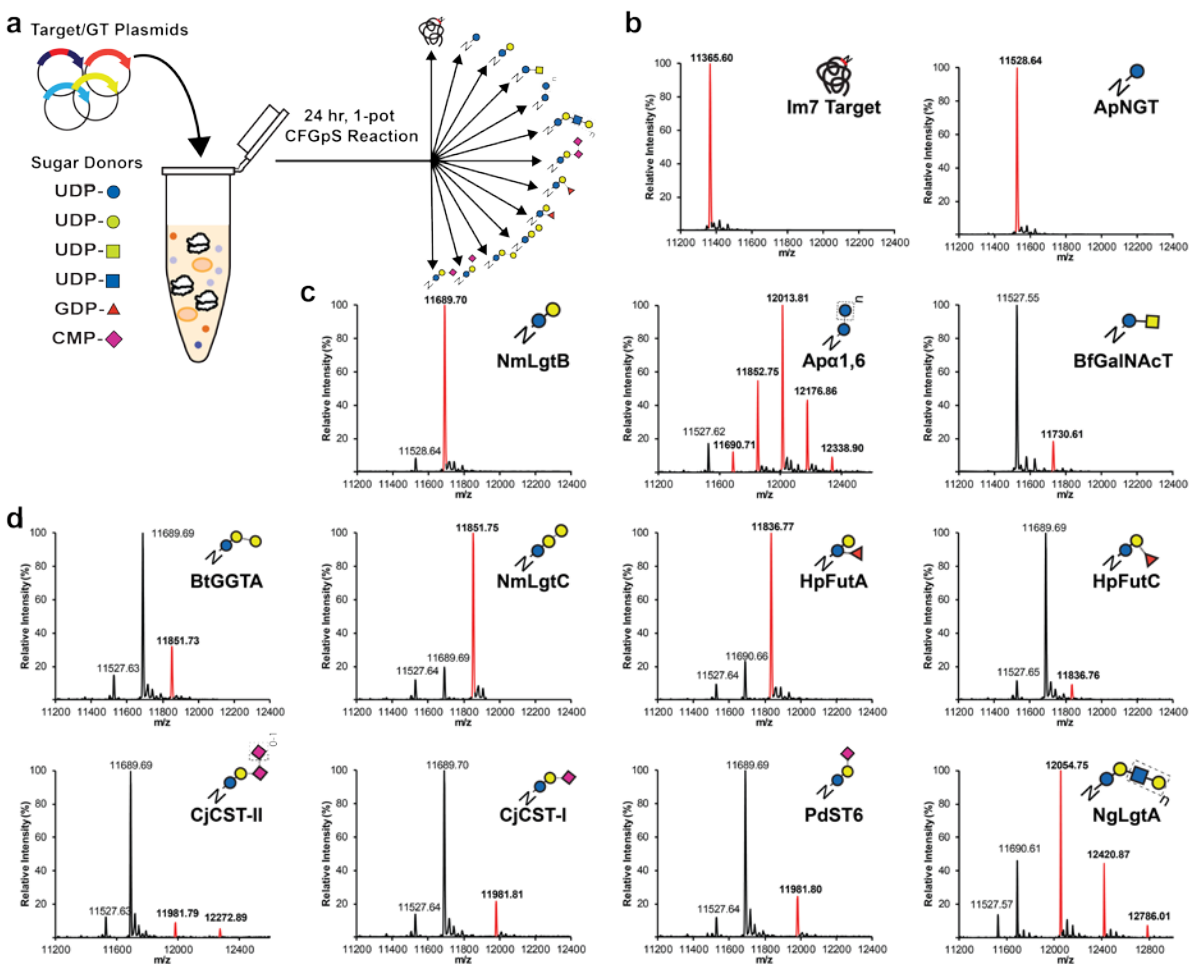

**Supplementary Figure 13: Intact protein MS spectra of Im7-6 synthesized and glycosylated by one-pot CFGpS reactions.** (a) Plasmids encoding the Im7-6 target protein and sets of up to three GTs based on 12 successful biosynthetic pathways developed by two-pot GlycoPRIME screening were combined with appropriate sugar donors in a CFGpS reaction and incubated for 24 h at 30°C. (b) Deconvoluted intact protein spectra from Im7-6 synthesized and glycosylated in CFGpS reactions with and without ApNGT plasmid. (c) Deconvoluted intact protein spectra from Im7-6 synthesized and glycosylated in CFGpS reactions with ApNGT plasmid and indicated GT plasmids. (d) Deconvoluted intact protein spectra from Im7-6 synthesized and glycosylated in CFGpS reactions with ApNGT, NmLgtB, and indicated GT plasmids. All reactions contained equimolar amounts of each plasmid and a total plasmid concentration of 10 nM. All Im7-6 proteins were purified using Ni-NTA magnetic beads before intact protein analysis (see **Methods**). All reactions showed intact protein mass shifts consistent with the modification of Im7-6 with the same glycans observed in our two-pot system (**Figs. 2-3**), although at lower efficiency. MS spectra were acquired from full elution areas of all detected glycosylated and aglycosylated protein or peptide species and are representative of n=2 CFGpS reactions. Deconvoluted spectra collected from m/z 100-2000 into 11,000-14,000 Da using Compass Data Analysis maximum entropy method. See **Supplementary Fig. 3** for theoretical mass values.



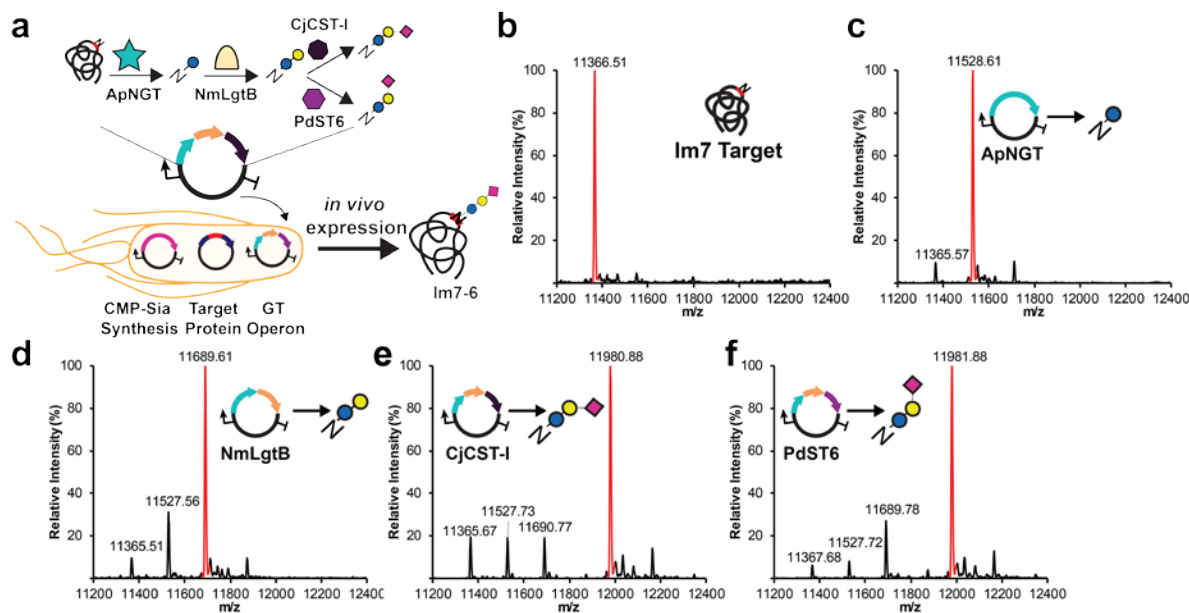

**Supplementary Figure 14: Production of sialylated Im7-6 in the *E. coli* cytoplasm.** (a) Design of cytoplasmic glycosylation system to produce sialylated glycoproteins in *E. coli*. Three plasmids containing NmNeuA (CMP-Sia synthesis), target protein containing ApNGT glycosylation acceptor sequence, and biosynthetic pathways discovered using GlycoPRIME (GT operon). (b-f) Deconvoluted intact protein spectra from Im7-6 purified from CLM24 $\Delta$ nanA *E. coli* strain containing CMP-Sia synthesis plasmid and Im7-6 target protein plasmid as well as no GT operon b; GT operon containing ApNGT c; GT operon containing ApNGT and LgtB d; GT operon containing ApNGT, NmLgtB, and CjCST-I e; or GT operon containing ApNGT, NmLgtB, and PdST6 f. The last GT in all glycosylation pathways is indicated. Mass shifts in intact protein spectra are consistent with established activities of each GT and the installation of *N*-linked Glc, lactose, 3'-sialyllactose, and 6'-sialyllactose onto Im7-6 in b, c, d, e, and f, respectively. All *E. coli* cultures were supplemented with 5 mM sialic acid and grown to OD600 = 0.6 at 37°C, induced with 1 mM IPTG and 0.2% arabinose, and then incubated overnight at 25°C. MS spectra were acquired from full elution areas of all detected glycosylated and aglycosylated protein species and were deconvoluted from m/z 100-2000 into 11,000-14,000 Da using Compass Data Analysis maximum entropy method. See **Supplementary Table 3** for theoretical masses. Spectra representative of n=2 bacterial cultures.

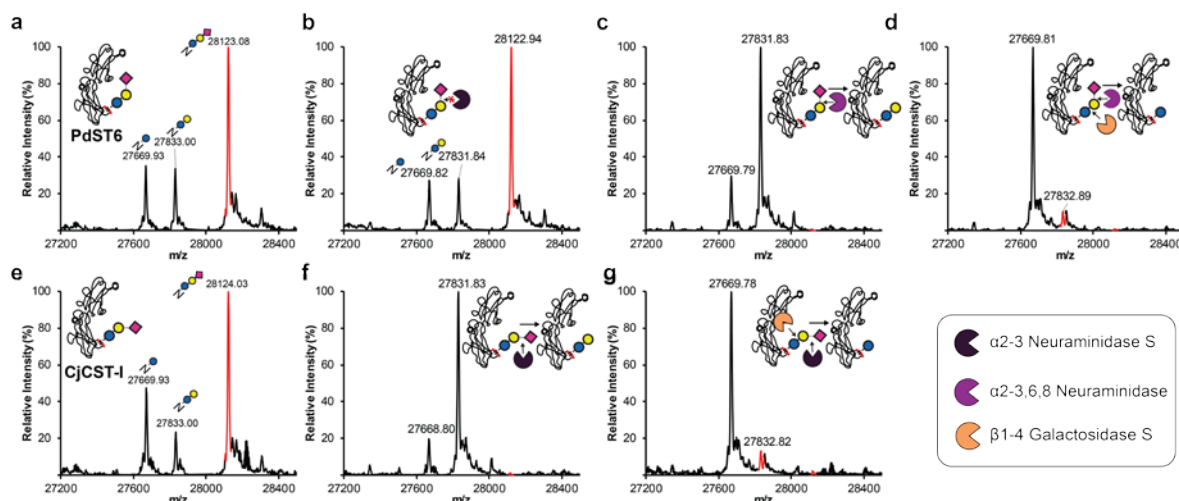

**Supplementary Figure 15: Exoglycosidase sequencing of Fc glycosylated in the *E. coli* cytoplasm.** (a) Deconvoluted intact protein spectra from Fc-6 purified from CLM24 $\Delta$ *nanA* *E. coli* strain containing CMP-Sia synthesis plasmid, Fc-6 target protein plasmid, and a GT operon plasmid containing ApNGT, NmLgtB, and PdST6. (b-d) Purified Fc-6 from a was incubated at 37°C for at least 4 h with commercially available  $\alpha$ 2-3 Neuraminidase S b,  $\alpha$ 2-3,6,8 Neuraminidase c, or  $\beta$ 1-4 Galactosidase S and  $\alpha$ 2-3,6,8 Neuraminidase d. Resistance of terminal sialic acid to  $\alpha$ 2-3 Neuraminidase S and susceptibility to  $\alpha$ 2-3,6,8 Neuraminidase indicates an  $\alpha$ 2-6 linkage, which is consistent with previously established activity of PdST6 (**Supplementary Table 4**). (e) Deconvoluted intact protein spectra from Fc-6 purified from CLM24 $\Delta$ *nanA* *E. coli* strain containing CMP-Sia synthesis plasmid, Fc-6 target protein plasmid, and a GT operon plasmid containing ApNGT, NmLgtB, and CjCST-I. (f-g) Purified Fc-6 from e was incubated at 37°C for at least 4 h with commercially available  $\alpha$ 2-3 Neuraminidase S b, or  $\beta$ 1-4 Galactosidase S and  $\alpha$ 2-3 Neuraminidase S. Susceptibility of terminal sialic acid to  $\alpha$ 2-3 Neuraminidase confirms the previously established activity of CjCST-I (**Supplementary Table 4**). Removal of middle galactose with addition  $\beta$ 1-4 Galactosidase S in d and g confirms the previously established activity of NmLgtB (**Supplementary Table 4**). a-c and e-f are also shown in Fig. 4. See **Methods** for exoglycosidase details and **Supplementary Table 7** for theoretical glycoprotein masses. All *E. coli* cultures were supplemented with 5 mM sialic acid and grown to OD600 = 0.6 at 37°C then induced with 1 mM IPTG and 0.2% arabinose then incubated overnight at 25°C. MS spectra were acquired from full elution areas of all detected glycosylated and aglycosylated protein species and were deconvoluted from m/z 100-2000 into 27,000-29,000 Da using Compass Data Analysis maximum entropy method.

**Supplementary Note 1: DNA sequences encoding engineered glycosylation targets, *in vitro* expressed glycosyltransferases, *in vivo* glycosyltransferases operons, and *in vivo* CMP-Sia production plasmid.**

**Key:**

TRANSLATED REGION

**Engineered glycosylation acceptor sequence**

Flanking regions adjacent to glycosylation acceptor sequence

untranslated region

promoter

terminator

AFFINITY TAG OR CSL LEADING SEQUENCE

**DNA sequence for Im7-6 Variant in pJL1 plasmid context:**

gaaat**taatac**gact**cactatagg**gagaccacaacggttccctctagaaataat**ttgtt**aactt**taagaagg**agatatacat  
ATGGA**ACTGGAAA**ATAGTATTAGTGATTACACAGAGGCTGAGTTTGT**TTCAACTTCTTAAGGAA**  
ATTGAAAAAGAG**GCGACTACC****GGAGGTA****ACTGGACAACAGCGGGAGG**AGATGTGTTAGAT  
GTGTTACTCGAACACTTTGTAAA**A**TTACTGAGCATCCAGATGGAACGGATCTGATCTATTAT  
CCTAGTGATAATAGAGACGATAGCCCCGAAGGGATTGTCAAGGAAATTAAGAATGGCGAGC  
TGCTAACGGTAAGCCAGGATTTAAACAGGGCGGATCC**CATCACCATCATCACC**ATTAAgtcgcac  
cggctgctaacaagcccgaaggaagctgagttgctgctgccaccgctgagcaataactagc**ataacccttggggcctctaaa**  
**cgggtcttgaggggtttttgct**gaaag

**DNA Sequence of ApNGT in pJL1 Context:**

gaaat**taatac**gact**cactatagg**gagaccacaacggttccctctagaaataat**ttgtt**aactt**taagaagg**agatatacatATGG  
AAAACGAGAATAAACCGAACGTGGCAAATTTTGAAGCAGCAGTTGCAGCCAAAGATTATGAA  
AAAGCATGTAGCGAGCTGCTGCTGATTCTGAGCCAGCTGGATAGCAATTTTGGTGGCATTCA  
TGAAATCGAGTTCGAGTACCCAGCTCAGCTGCAGGATCTGGAGCAGGAAAAAATTGTGTAC  
TTTTGCACCCGTATGGCGACTGCCATCACCACCCTGTTCTCTGACCCGGTTCTGGAATCT  
CCGACCTGGGTGTGCAGCGTTTCCCTGGTTTATCAGCGTTGGCTGGCGCTGATCTTCGCTAG  
CAGCCCGTTTCGTGAACGCAGACCACATCCTGCAGACTTACAACCGTGAACCGAACCGCAA  
AAACTCCCTGGAAATTCACCTGGACTCTAGCAAGTCCTCTCTGATTAAATTTTGCATCCTGTA  
CCTGCCGGAATCTAATGTGAACCTGAATCTGGATGTGATGTGGAACATTTCCCGGAGCTGT  
GTGCCTCTCTGTGCTTTGCGCTGCAAAGCCCGCGTTTTTGTGGCACCAGCACCGCCTTTAA  
CAAACGCGCGACCATTCTGCAGTGGTTCCCGCGTCATCTGGACCAGCTGAAAAACCTGAA  
CAACATCCCGTCCGCTATCTCTCATGACGTGTATATGCACTGTTCTTACGACACCAGCGTTAA  
CAAGCACGATGTTAAGCGCGCGCTGAATCACGTGATTTCGTCGCCACATCGAATCCGAATAC  
GGTTGAAAGATCGTGATGTGGCTCACATCGGTTATCGCAACAACAAACCGGTTATGGTCG  
TTCTGCTGGAACATTTTCATAGCGCGCACTCTATCTACCGTACTCACTCTACCAGCATGATCG  
CCGCGCGCGAACACTTCTATCTGATCGGCCTGGGTTCCCGAGCGTTGACCAGGCCGGTC  
AGGAGGTTTTTCGATGAATTCACCTGGTAGCGGGTGACAACATGAAGCAAAAACCTGGAATT

CATTCGTTCTGTGTGCGAAAGCAATGGTGCGGCAATTTTCTACATGCCGAGCATCGGTATGG  
ATATGACCACCATCTTCGCGTCCAATACCCGTCTGGCGCCGATT CAGGCAATCGCCCTGGG  
CCACCCGGCGACTACTCACTCCGACTTCATTGAATACGTTATCGTGGAAGACGACTACGTC  
GGCTCTGAGGAATGCTTCTCTGAAACCCTGCTGCGTCTGCCGAAAGACGCTCTGCCGTATG  
TTCCGTCCGCCCTGGCTCCGGAGAAAGTTGATTACCTGCTGCGTGAAAACCCTGAAGTTGT  
CAACATCGGTATTGCCTCTACCACTATGAAGCTGAACCCGTA CTTCCTGGAAGCACTGAAGG  
CCATTCGTGACCGTGCGAAGGTGAAAGTGCACCTTCCACTTCGCACTGGGCCAGTCCAATG  
GTATCACTCACCCCTTACGTTGAACGCTTTATCAAATCTTACCTGGGCGACAGCGCTACCGCG  
CACCCGCACTCTCCGTACCACAGTACCTGCGTATTCTGCACAACTGCGATATGATGGTAAA  
CCCTTTTCCGTTTGGTAATACCAATGGTATTATTGACATGGTAACCCTGGGTCTGGTAGGTGT  
TTGCAAAACCGGTGCGGAAGTCCACGAACATATCGATGAAGGCCTGTTCAAACGTCTGGGC  
CTGCCGGAATGGCTGATTGCAAACACCGTGGACGAATACGTGGAACGTGCAGTGCGCCTG  
GCCGAGAACCATCAGGAACGTCTGGAACCTGCGTTCGTTACATTATTGAAAACAATGGCCTGA  
ACACCCTGTTACCGGCGACCCACGCCCGATGGGTCAGGTGTTCTGGAAAACTGAACG  
CATTCTGAAGGAAAATAAgtcgaccggctgctaacaagccccgaaaggaagctgagttggctgctgccaccgctga  
gcaataactagc**ataacccttggggcctctaaacgggtcttgaggggtttttgct**gaaa

**DNA Sequence of Aps1-6 in pJL1 Context:**

gaaat**taatac**gactcactataggagaccacaacggttccctctagaaaacgacactataactactaaggaggctaattATGGAA  
AACAACATCGACCTGAACGTTTATTTCTGCTTCGTC AACCGTCCATGCACTGGCGGCGATTT  
CGTTAACCTGGATCACGTCCGTACCCTGCGCAAACCTGGGCATCAACGCTAGCATTCTGCTG  
GCTGGCAACCAGTCCGAAGAAATCGTTAACAGCTTCGGCTCTCTGCCAGTTGTGATTCTGA  
ACGAAGAGATTGAGTTTAGCTCCCAGGATATCTTCATTGTGCCGGAAGTTATGCAGGTTCTG  
TACGATCTGGCTTCCAAGATGACCGTCTTCCCGCGTATGATTATGCACAACCAAAACCCATT  
TTACTACTGGCTATGGTTTCCTGTCCGCGCAGCACATTAACGAACACCGTCTGGAACGCATTA  
TCGTCCCGTCCAGCTACACCAATACAAACCTGCAGGAAATCGGCGTAACCAAAACCGATCGA  
TATCATTATCCGTATATTCCAGATTATTTCAAGCCGGCGGAAAAACAGCGTGAGGTCATTCA  
AATCGCCTTCTCCCGTCGTAAACGTTCTGCGGAATTCGACATCTTCAAGTTCTACTTCCTGT  
CCCTGTA CTCCCACAAACACTCTGTAAACTTTGTTAACATCCAGGGTCTGACCCGCGAGGA  
AGTGGCGAAGGTTATGTCTGAAGCGGCCATCTTTATTTCTTTGCTGAACGTGAATCTCTGG  
GTCTGATGACGCTGGAAGCTATGGCATCCGGTTGTCACGTTATCGGCTTCTCCGGTTATACT  
GACATCTACAATAACGAAGTTATTGACGATTCTGTTGGTGACTGGATCGGTGAAGGCGAGTA  
CACCTGTTTCGCACAGAAAGTTTGTGAGGCGATCGATGACTTCGTGAACGGCAAATGAAT  
CCGAAAATTGAAAACGGTCTGCGTCTGATCGAACAGCGTTTCCGTATTCGTCACTTCGAACA  
GGAAGTAAAACGTGTATACGGTAACATTTTCGATTATGATCTGGAAAACCTCTCGCTCCTAAgtc  
gaccggctgctaacaagccccgaaaggaagctgagttggctgctgccaccgctgagcaataactagc**ataacccttggggcctct**  
**aaacgggtcttgaggggtttttgct**gaaa

**DNA Sequence of BfGalNAcT1 in pJL1 Context:**

gaaat**taatac**gactcactataggagaccacaacggttccctctagaaaaggagactagactattaatttaaggaggctata  
ATGGGTACCAACAACCTCTGACTTCTACCTGCCGGTCTATGTTATTAATCTGAAAGAACGTA CT

GAACGCCGTCAGCACATTGAGGAGCAGTTCCAAGGTAAAGTTGAATTCGCTCTGCACTGGA  
TCGAGGCGATCGAGCACAGCATCGGTGCGGTGGGTCTGTGGCAGTCTATGCTGAAAGCCG  
TTCAGACTGCTATCGACAAACGCGACGATATCATGATCATTTGTGAGGATGACCACATTTTCA  
CTCCGGCATAACAAGGACTACCTGTTTCGCGAATATCATCGGTGCGAACGCACAGGGTAG  
CGAACTGCTGTCCGGTGGTGTGGCGGTTTCGGTACCGCGGTGCCAGTGGATAACCAACCG  
TTATTGGATGGACTGGTCTGGTCTACCCAATTCATCATCATCTTCAAGCCGCTGTTCCAGAA  
AATCCTGGACTATGATTTCAAAGACACCGACACGGCTGACGGCGTCCTGAGCGTCTGGCG  
AAAGACAAGATGACCATCTATCCGTTTATTAGCGTTCAAAAAGATTTTCGGTTACAGCGACGT  
GACCGTTTACAACGGTACTCCTGGTATGATCTCTAACTACTTTTCCCAGGCTAACTACCGCCT  
GCGTATGATCCACCATGTAAGCCACAAATTCAAAGAGCAGGCAAACGCTAAgtcgaccggctgct  
aacaagccccgaaaggaagctgagttggctgctgccaccgctgagcaataactagc**ataacccttggggcctctaacgggtctt**  
**gaggggtttttgctgaaag**

#### DNA Sequence of Hp $\beta$ 4GalI in pJL1 Context:

gaaat**taatac****gactcactatagg**gagaccacaacggtttccctctagaataatTTTgtttaactttaagaaggagatatacat**ATGG**  
**AGAAAAAATCTGGAGCCATCCGCAGTTCGAAAAGGCTCCCGCGTGTATTATTATCAGCCTG**  
AATCAGAAAGTTTGCATCAGTTTGGTCTGGTTTTTCGTGATACCACCACCCTGCTGCATAA  
CATTAAATGCAACCCATCATAAAGCCAGATCTTCGATGCAATTTACAGCAAAACCTTTGAAAG  
CGAACTGCATCCGCTGGTTAAAAAACATCTGCATCCGTATTTTATCACCCAGAACATTAAGA  
TATGGGCATTACCACCAATCTGATTAGCCGTGTTAGCAAATTTCTATTATGCCCTGAAATACCAT  
GCCAAATTTATGAGCTTTGGTGAACCTGGGTTGTTATGCAAGCCATTATAGCCTGTGGGAAAA  
ATGCATTGAACTGAATGAACCGATTTGCATCCTGGAAGATGATATCACCCCTGAAAGAAGATTT  
TAAAGAGGGCCTGGATTTCTGGAAAAACATATTCAAGAACTGGGCTATGCACGTCTGATGT  
ATCTGCTGTATGATGCCAATGTTAAAGCGAACCGCTGAGCCATAAAAACCATGAAATCCAA  
GAACGTGTGGGCATCATTAAAGCATATAGCCATGGTGTGGCACCCAGGGTTATGTTATTAC  
CCCGAAAATTGCCAAAGTGTTCAAAAATGTAGCCGCAAATGGGTTGTTCCGGTTGATACCA  
TTATGGATGCAACCTTTATTACAGGCGTTAAAAATCTGGTCTGACGCCGTTTGTATTGCGAG  
ATGATGAGCAGATTAGCACCATTTGCACGTAAAGAAGAACCGTATAGCAGCAAAATTGCACTG  
ATGCGTAACTGCACTTCAAATATCTGAAATACTGGCAGTTCGTGTAAgtcgaccggctgctaacaaa  
gccccgaaaggaagctgagttggctgctgccaccgctgagcaataactagc**ataacccttggggcctctaacgggtcttgaggggt**  
**ttttgctgaaag**

#### DNA Sequence of NmLgtB in pJL1 Context:

gaaat**taatac****gactcactatagg**gagaccacaacggtttccctctagaataatTTTgtttaactttaagaaggagatatacat**ATGC**  
**AGA**ACCATGTTATTAGCCTGGCAAGCGCAGCAGAACGTCGTGCACATATTGCAGATACCTTT  
GGTCGTCATGGTATTCCGTTTTAGTTTTGATGCACTGATGCCGAGCGAACGTCTGGAACA  
GGCAATGGCAGAACTGGTTCGGGTCTGAGCGCACATCCGTATCTGAGCGGTGTTGAAAA  
AGCATGTTTTATGAGCCATGCAGTTCTGTGGAAACAGGCACTGGATGAAGGTCTGCCGTATA  
TTACCGTTTTTGAAGATGATGTTCTGCTGGGTGAAGGTGCAGAAAAATTTCTGGCAGAAGAT  
GCCTGGCTGCAAGAACGTTTTGATCCGGATACCGCATTTATTGTTCTGCTGAAACCATGTT  
TATGCATGTTCTGACCAGCCCAGCGGTGTGGCAGATTATTGTGGTCTGCATTTCCGCTG

CTGGAAAGCGAACATTGGGGCACCGCAGGTTATATCATTAGCCGTAAAGCAATGCGCTTTTT  
TCTGGATCGTTTTGCAGCACTGCCTCCGGAAGGCCTGCATCCGGTTGATCTGATGATGTTTA  
GCGATTTTTTTGATCGTGAAGGTATGCCGGTTTGTGAGCTGAATCCGGCACTGTGTGCACAA  
GAACTGCACTATGCAAATTTTCATGATCAGAATAGCGCACTGGGTAGCCTGATTGAACATGAT  
CGTCTGCTGAATCGTAAACAGCAGCGTCGTGATAGTCCGGCAAATACCTTTAAACATCGTCT  
GATTTCGTGCCCTGACCAAATTAGCCGTGAACGTGAAAACGTGTCAGCGTCGCGAACAG  
TTTATTGTGCCGTTTCAGGGATCCTGGAGCCATCCGCAGTTTCGAAAAATAAgtcgaccggctgctaa  
caaagcccgaaggaagctgagttggctgctgccaccgctgagcaataactagc**ataacccttggggcctctaaacgggtcttga**  
**gggtttttgctgaaag**

#### DNA Sequence of Bt $\beta$ 4GalT1 in pJL1 Context:

gaaat**taatacgaactactatagg**gagaccacaacggtttccctctagaacgatatcgtcacactagttaaggaggttaagaATGA  
AATTCCGTGAGCCGCTGCTGGGCGGCTCTGCTGCAATGCCGGGCGCCTCTCTGCAACGTG  
CATGCCGTCTGCTGGTCGCAGTTTGCAGCTGCACCTGGGTGTTACCCTGGTCTACTATCT  
GGCTGGCCGCGATCTGCGTCGCCTGCCGCAACTGGTTGGTGTGCACCCGCCTCTGCAGG  
GTAGCAGCCATGGTGCAGCAGCTATCGGCCAACCGAGCGGTGAACCTGCGCCTGCGTGGT  
GTTGCACCGCCGCTCCGCTGCAGAACAGCAGCAAACCGCGTTCTCGCGCGCCGAGCAA  
CCTGGACGCGTACTCCCACCCTGGCCCGGGCCAGGTCCGGGCAGCAATCTGACTTCTG  
CTCCTGTACCGTCTACCACCACCCGCAGCCTGACCGCATGCCCGGAAGAATCTCCGCTGC  
TGTTGGTCCGATGCTGATCGAATCAACATCCCAGTTGACCTGAAGCTGGTGGAACAGCA  
AAACCCTAAGGTGAAGCTGGGTGGTCGTTACTCCAATGGATTGCATTTCTCCGCACAAA  
GTCGCAATTATTATCCCTTTCCGTAACCGTCAGGAACACCTGAAATACTGGCTGTACTACCTG  
CACCCGATCCTGCAGCGCCAGCAGCTGGATTACGGTATCTACGTGATTAATCAGGCGGGTG  
AGAGCATGTTCAATCGCGCGAAGCTGCTGAACGTTGGTTTCAAGGAGGCTCTGAAAGACTA  
CGACTACAACCTGTTTCGTATTCTCTGATGTGGACCTGATCCCGATGAACGACCACAACACCT  
ACCGCTGCTTCTCCAGCCGCGCCATATTTCTGTGCAATGGATAAATTCGGTTTTAGCCTG  
CCATACGTCCAGTACTTCGGCGGCGTTTTCCGCTCTGAGCAAACAACAGTTCCTGTCTATCAA  
CGGTTTTCTAACAACCTATTGGGGCTGGGGTGGTGAAGATGACGATATTTACAACCGCCTG  
GCGTTTCGTGGTATGTCCGTTAGCCGTCCGAACGCGGTTATCGGTAAATGCCGCATGATCC  
GCCATTCTCGTGATAAGAAGAACGAGCCGAATCCGCAGCGCTTCGACCGTATCGCCACAC  
CAAAGAACTATGCTGTCCGACGGTCTGAATTCCTGACTTACATGGTACTGGAAGTACAGC  
GTTATCCGCTGTATACCAAATCACCGTTGATATCGGCACTCCGTCTTAAgtcgaccggctgctaa  
aagcccgaaggaagctgagttggctgctgccaccgctgagcaataactagc**ataacccttggggcctctaaacgggtcttga**  
**gggtttttgctgaaag**

#### DNA Sequence of NgLgtB in pJL1 Context:

gaaat**taatacgaactactatagg**gagaccacaacggtttccctctagaataattttgttaactttaagaaggagatatacat  
ATGCAGAACCACGTGATTTCCCTGGCTTCAGCGGCCGAGCGCCGTGCTCATATTGCTGCCA  
CCTTTGGTAGTCGTGGAATCCCTTTCCAGTTCTTCGATGCCCTGATGCCTTCAGAACGTCTG  
GAGCAGGCAATGGCGGAGCTGGTCCCTGGTCTGTGAGCCCATCCTTATCTGTCTGGCGTT  
GAAAAGCGTGTTTCATGTCCCATGCTGTCTGTGGGAACAAGCCCTGGATGAGGGTCTGC



CGTATATCGCCGTGTTTGAGGACGATGTGCTGCTGGGTGAAGGTGCTGAACAGTTTCTGGC  
CGAGGACACTTGGCTGGAAGAGCGTTTCGATAAAGACTCAGCGTTCATTGTCCGTCTGGAG  
ACAATGTTTATGCACGTGCTGACTTCTCCATCTGGTGTAGCCGATTATGGCGGTCTGCCTT  
TCCTCTGCTGGAGTCCGAACACTGTGGTACAGCCGGGTATATTATCAGCCGTAAAGCCATG  
CGTTTCTTTCTGGATCGTTTTGCTGTGCTGCCTCCGGAGCGCCTGCATCCTGTTGATCTGAT  
GATGTTTGGCAATCCTGATGACCGTGAGGGTATGCCAGTTTGTGAGCTGAATCCGGCACTG  
TGTGCTCAGGAACTGCATTATGCCAAATTTACGACCAGAATAGCGCTCTGGGAAGTCTGAT  
TGAACATGATCGTCGCCTGAACCGTAAACAACAGTGCGGTGATAGTCCGGCTAACACGTTTA  
AACACCGCCTGATTCGTGCTCTGACCAAAATTGGCCGTGAGCGTGAAAACGTCGTAAACG  
CCGTGAACAGACGATTGGGAAAATCATTGTGCCATTCCAGTGAgtcgaccggctgctaacaagcccg  
aaaggaagctgagttggctgctgccaccgctgagcaataactagc**ataacccttggggcctctaaacgggtcttgaggggtttttgct**  
gaaag

#### DNA Sequence of SpWchJ in pJL1 Context:

gaaat**taatacgactcactatagg**gagaccacaacggttccctctagaataattttgttaactttaagaaggagatatacatATGA  
AAATCTGCCTGGTTGGTAGCAGCGGTGGTCATCTGACCCATCTGTATCTGCTGAAACCGTTT  
TGAAAAGATAAAGAACGTTTTTGGGTGACCTTCGATAAAGAAGATACCCGTAGCATTCTGGG  
CAACGAAACCTTTTATCCGTGTCATTATCCGACCAATCGCAATCTGAAAAACCTGATTA  
CACCCTTCTGGCCTTTAACATTCTGCGCAAAGAACGTCCGGATGTGATTATTAGCAGTGGTG  
CAGCAGTTGCAGTTCGGTTTTTCTATCTGGGTAAACTGTTTGGTGCCAAAACCGTGTATATC  
GAAGTGTTGATCGTATTGATGCACCGACCCTGACCGGTA  
AAATTCAATCGTGCAGTGGGAAGAGATGAAAAAAGTTTATCCGAAAGCCATTAATCTGGGTGG  
CATTTTTAAgtcgaccggctgctaacaagcccgaaaggaagctgagttggctgctgccaccgctgagcaataactagc**ata**  
**acccttggggcctctaaacgggtcttgaggggtttttgct**gaaag

#### DNA Sequence of SpWchK in pJL1 Context:

gaaat**taatacgactcactatagg**gagaccacaacggttccctctagaataattttgttaactttaagaaggagatatacatATGA  
TCTTCGTTACCGTTGGCACCCATGAACAGCAGTTTAATCGTCTGATTAAAGAAGTGGATCGC  
CTGAAAGGTGAAGGCTTTATTCAGGATGATGTGTTTATTCAGACCGGCTATAGCAATTATGTG  
CCGAAATTTTGCAATGGGAGAACTGATCAGCTATGAAAAAATGAACCAGCTGATCAAAGA  
GAGCGATATTATCATTACACATGGTGGTCCGGCAACCTTTATGGCAGTTATTGCAAAGGTAA  
AAACCCGATTATTGTGCCACGCCTGAAAAAATTCGGTGAACATGTTAATGATCATCAGATGCA  
GTTTCGTGAAAATCACCAAAGAAATCTACAACCTGATCGTGATCGATGATATTAGCGATCTGCA  
CCTGATTCTGCACAACCTCAAAGATAAACTTCGAAACCTACCTGAACAACGAACGTTTTAA  
TGTGCGCTTTAACGTGGAAATCAGCAACCTGTTTAAAGGCAACAAAATCAATGAAAATTAgtc  
gaccggctgctaacaagcccgaaaggaagctgagttggctgctgccaccgctgagcaataactagc**ataacccttggggcctct**  
**aaacgggtcttgaggggtttttgct**gaaag

#### DNA Sequence of NmLgtC in pJL1 Context:

gaaat**taatacgactcactatagg**gagaccacaacggttccctctagaagcacatagtagacagacacagtataaggagggttcaatAT  
GGATATCGTTTTTCGCGGCAGACGATAACTACGCTGCCTACCTGTGCGTGGCAGCAAATCC

GTGGAAGCTGCCACCCGGATACCGAAATCCGCTTCCACGTCCTGGACGCAGGTATTAGC  
GAAGCGAACCGTGCCGCAGTAGCGGCGAACCTGCGTGCGGCGGGCGGTAACATCCGCTT  
CATCGATGTGAACCCGGAAGATTTTGGGGCTTTCCACTGAACATCCGCCATATTTCCATCA  
CTACTTATGCGCGTCTGAAACTGGGCGAATACATCGCGGATTGCGACAAAGTTCTGTACCTG  
GATATCGATGTGCTGGTACGTGACTCTCTGACCCCGCTGTGGGACACTGACCTGGGCGATA  
ACTGGCTGGGTGCCTGTATTGACCTGTTTCGTGGAACGTCAGGAAGGTTACAAACAAAAAAT  
CGGTATGGCCGATGGCGAATACTACTTCAACGCTGGCGTGCTGCTGATCAACCTGAAAAA  
TGCGTTCGTCATGATATTTTCAAATGTCCTGCGAGTGGGTAGAACAGTATAAGGACGTTAT  
GCAGTACCAGGACCAGGATATCCTGAACGGCCTGTTAAAGGTGGTGTCTGTTACGCCAAC  
AGCCGCTTCAACTTCATGCCGACCAACTACGCGTTCATGGCGAATCGCTTCGCGTCTCGTC  
ACACCGACCCTCTGTACCGTGATCGCACCAACACCGTGATGCCGGTTCGCGGTGCCACT  
ACTGTGGTCCTGCGAAGCCATGGCACCGTGACTGTACCGCTTGGGGTGCTGAGCGTTTCA  
CGGAAGTGGCTGGTAGCCTGACCACGGTCCCTGAAGAATGGCGCGGTAAACTGGCTGTTC  
CGCACCGTATGTTCTCCACCAAACGCATGCTGCAGCGTTGGCGCCGCAAACACTGAGCGTC  
GTTTCCTGCGCAAATCTATTAgtcgaccggctgctaacaagcccgaaggaagctgagttggctgctgccaccg  
ctgagcaataactagc**ataaccctggggcctctaaacgggtcttgaggggtttttgctgaaag**

#### DNA Sequence of HsSIAT1 in pJL1 Context:

gaaat**taatac**gactcactataggagaccacaacggtttccctctagaataatTTTgtttaactttaagaaggagatatacatATGG  
AGAAAAAATCTGGAGCCATCCGCAGTTCGAAAAAGGCTCCAAAGAGAAAAAAAAGGCAG  
CTACTACGATAGCTTCAAACCTGCAGACCAAAGAATTTAGGTTCTGAAAAGCCTGGGTAAAC  
TGGCAATGGGTAGCGATAGCCAGAGCGTTAGCAGCAGCAGTACCCAGGATCCGCATCGTG  
GTCGTCAGACCCTGGGTAGCCTGCGTGGTCTGGCAAAGCAAACCGGAAGCAAGCTTTC  
AGGTTTGAATAAAGATTCCAGCAGCAAAAATCTGATTCCGCGTCTGCAGAAAATCTGGAAA  
AACTATCTGAGCATGAACAAATACAAAGTGAGCTATAAAGGTCCGGGTCCGGGTATCAAATTT  
TCAGCAGAAGCACTGCGTTGTCATCTGCGTGATCATGTTAATGTTAGCATGGTTGAAGTTAC  
CGATTTTCCGTTTAATACCAGCGAATGGGAAGGTTATCTGCCGAAAGAAAGCATTTCGTACCA  
AAGCAGGTCCGTGGGGTCGTTGTGCAGTTGTGAGCAGCGCAGGTAGCCTGAAAAGCAGC  
CAGCTGGGTCGTGAAATTGATGATCATGATGCAGTTCTGCGTTTTAATGGTGCACCGACCGC  
CAACTTTCAGCAGGATGTTGGCACCAAAACCACCATTCGTCTGATGAATAGTCAGCTGGTTA  
CCACCGAAAAACGCTTTTCTGAAAGATAGCCTGTATAACGAAGGTATTCTGATTGTTTGGGAT  
CCGAGCGTTTATCATAGCGATATTCCGAAATGGTATCAGAACCCGGATTACAACCTTCTTCAAC  
AACTATAAAACCTATCGCAAACCTGCACCCGAATCAGCCGTTTTATATCCTGAAACCGCAGATG  
CCGTGGGAACCTGTGGGATATTCTGCAAGAAATTAGTCCGGAAGAAATTCAGCCGAATCCGC  
CTAGCAGCGGTATGCTGGGTATTATCATTATGATGACCCTGTGTGATCAGGTGGATATCTATG  
AATTTCTGCCGAGCAAACGTAAAACCGATGTGTGTTACTATCAGAAATTCCTCGATAGCG  
CCTGTACCATGGGTGCATATCATCCGCTGCTGTATGAAAAAATCTGGTGAACACCTGAAT  
CAGGGCACCGATGAAGATATTTATCTGCTGGGTAAAGCAACCCTGCCTGGTTTTCTGATACCAT  
TCATTGTTAAgtcgaccggctgctaacaagcccgaaggaagctgagttggctgctgccaccgctgagcaataactagc**ata  
accctggggcctctaaacgggtcttgaggggtttttgctgaaag**

### DNA Sequence of PmST3,6 in pJL1 Context:

gaaattaaatcgaactcactatagggagaccacaacggttccctctagaataattttgttaactttaagaaggagatatacatATGG  
AGAAAAAATCTGGAGCCATCCGCAGTTCGAAAAAGGCTCCAAAAATCGTCGCCTGAACTT  
CAAAGTGTCTCCTGATTATCTTTAGCCTGTTTAGCACCTGAGCTGGTCAAAAACCATTAC  
CCTGTATCTGGATCCGGCAAGCCTGCCTGCACTGAACCAGCTGATGGATTTTACCCAGAATA  
ACGAGGATAAAACCCATCCGCATCTTTGGTCTGAGCCGCTTTAAAATCCCGGATAACATTA  
TTACCCAGTACCAGAACATCCACTTCGTGGAAGTAAAGATAACCGTCCGACCGAAGCACT  
GTTTACCATTCTGGATCAGTATCCGGGTAATATCGAACTGAACATCCATCTGAATATTGCCAT  
AGCGTTCAGCTGATTCTGTCGATTCTGGCATATCGTTTTAAACATCTGGATCGTGTTAGCATT  
CAGCAGCTGAACCTGTATGATGATGGTAGCATGGAATATGTGGATCTGGAAAAAGAAGAGAA  
CAAAGATATCAGCGCAGAAATCAAACAGGCAGAAAAACAGCTGAGCCATTATCTGCTGACC  
GGCAAATCAAATTCGATAATCCGACCATTGCACGTTATGTTTGGCAGAGCGCATTTCGGT  
TAAATATCATTTTCTGAGCACCGATTATTTTAAAAAGCCGAATTTCTGCAGCCGCTGAAAGA  
ATATCTGGCAGAAAATTACCAGAAAATGGATTGGACCGCATATCAGCAACTGACACCGGAAC  
AGCAGGCATTTTATCTGACCCTGGTTGGTTTTAACGATGAAGTTAAACAGAGCCTGGAAGTT  
CAGCAGGCCAAATTTATCTTTACCGGCACCACCCTGGGAAGGTAATACCGATGTTTCGTGA  
ATATTATGCACAGCAACAGCTGAATCTGCTGAATCATTTTACACAGGCCGAAGGTGACCTGT  
TTATTGGTGATCATTACAAAATCTATTTCAAAGGTCATCCGCGTGGTGGCGAAATTAATGATTA  
TATTCTGAACAACGCCAAAAACATCACCACATTCCGGCAAACATTAGCTTTGAAGTGCTGAT  
GATGACCGGTCTGCTGCCGATAAAGTTGGTGGTGTGCAAGCAGCCTGTATTTTAGCCTG  
CCGAAAGAAAAAATCAGCCACATCATTTTACCAGCAACAACAGGTGAAAAGCAAAGAAG  
ATGCACTGAATAACCCGTACGTTAAAGTTATGCGTCGTCTGGGTATTATTGATGAAAGCCAGG  
TGATCTTTTGGGATAGCCTGAAACAGCTGTAAgtcgaccggctgctaacaagcccgaaggaagctgagttg  
gctgctgccaccgctgagcaataactagcataacccttggggcctctaaacgggtctgaggggtttttgctgaaag

### DNA Sequence of CjCST-I in pJL1 Context:

gaaattaaatcgaactcactatagggagaccacaacggttccctctagaataattttgttaactttaagaaggagatatacatATGG  
AGAAAAAATCTGGAGCCATCCGCAGTTCGAAAAAGCGGATCCGGAGGCAGCCACATGA  
CCCGTACCCGTATGGAAAATGAACTGATTGTGAGCAAAAACATGCAGAACATTATCATTGCA  
GGTAATGGTCCGAGCCTGAAAAACATTAATAAAGTCTGCCTCGCGAGTATGATGTTTTT  
CGTTGTAACCAGTTCTATTTGAGGATAAATACTATCTGGGCAAAAAAATCAAAGCCGTGTTT  
TTCAATCCGGGTGTTTTTCTGCAGCAGTATCATACCGCAAAAACAGCTGATTCTGAAAAACGA  
GTACGAGATCAAAAACATCTTTTGCAGCACCTTTAACCTGCCGTTTATTGAAAGCAACGATTT  
CCTGCACCAGTTTTTACAACCTTTTTCCGGATGCAAAACTGGGCTATGAAGTGATTGAAAACC  
TGAAAGAGTTCTACGCCTATATCAAATACAACGAGATCTATTTCAACAAACGCATTACCAGCG  
GTGTTTATATGTGTGCAATTGCCATTGCCCTGGGCTATAAAACCATTTATCTGTGCGGTATCG  
ATTTCTATGAAGGCGACGTTATTTATCCGTTTGAAGCAATGAGCACCACATTAACAATCTT  
CCCTGGCATCAAAGACTTCAAACCGAGCAATTGTACAGCAAAGAATATGATATTGAGGCC  
TGAAACTGCTGAAAAGCATCTATAAAGTGAACATCTATGCCCTGTGTGATGATAGCATTCTGG  
CAAATCATTTTCCGCTGAGCATTAAACATCAACAACAACCTTTACCCTGAAAACAAACACAACA  
ACAGCATCAATGATATCCTGCTGACCGATAATACACCGGGTGTAGCTTTTACAAAATCAGC

TGAAAGCCGATAACAAAATTATGCTGAACTTTTATTAgtcgaccggctgctaacaagccccgaaaggaagc  
tgagttggctgctgccaccgctgagcaataactagc**ataacccttggggcctctaaacgggtcttgaggggtttt**gctgaaag

#### DNA Sequence of CjCST-II in pJL1 Context:

gaaat**taatac**gact**cactatagg**gagaccacaacggttccctctagaataattttgttaactttaagaaggagatatacat**ATGG**  
**AGAAAAAATCTGGAGCCATCCGCAGTTCGAAAAGGCGGATCCGG**AAAAAAGTGATCAT  
TGCAGGTAATGGTCCGAGCCTGAAAGAAATTGATTATAGCCGTCTGCCGAACGATTTTGATG  
TTTTTCGTTGCAACCAGTTCTATTTTCGAGGACAAATACTACCTGGGCAAAAAATGTAAAGCCG  
TGTTTTATAACCCGAGCCTGTTTTTCGAACAGTACTATACCCTGAAACATCTGATCCAGAATC  
AAGAGTATGAAACCGAACTGATTATGTGCAGCAATTATAACCAGGCCATCTGGAAAATGAG  
AACTTTGTGAAAACCTTCTATGACTATTTTCCGGATGCACATCTGGGCTACGATTTTTTCAA  
CAGCTGAAAGATTTCAACGCCTACTTCAAATTTACGAGATCTATTTTAACCAGCGCATTACC  
AGCGGTGTTTATATGTGTGCAGTTGCAATTGCCCTGGGCTATAAAGAAATTTATCTGAGCGG  
CATCGATTTCTATCAGAATGGTAGCAGCTATGCCTTTGACACCAAACAGAAAAATCTGCTGAA  
ACTGGCACCGAACTTCAAAAATGATAACAGCCATTATATCGGCCATAGCAAAAACACCGATAT  
TAAAGCACTGGAATTTCTGGAAAAACCTATAAAATCAAACGTACTGCCTGTGTCCGAATAG  
CCTGCTGGCAAACCTTTATTGAGCTGGCTCCGAATCTGAATAGCAACTTTATCATCCAAGAGA  
AAAACAACCTATACCAAAGACATTCTGATTCCGAGCAGCGAAGCCTATGGTAAATTTAGCAAAA  
ATATCAACTAAgtcgaccggctgctaacaagccccgaaaggaagctgagttggctgctgccaccgctgagcaataactagc**a**  
**taacccttggggcctctaaacgggtcttgaggggtttt**gctgaaag

#### DNA Sequence of SpPvg1 in pJL1 Context:

gaaat**taatac**gact**cactatagg**gagaccacaacggttccctctagaataattttgttaactttaagaaggagatatacat**ATGG**  
**AGAAAAAATCTGGAGCCATCCGCAGTTCGAAAAGGCGGATCCGG**AGACTTGCAAACCTTT  
GAAGAACCCTAGTAGTCTAACTTCTCCTTCTCGTCTACTTCGGTTGACAAGAAAAAGCCCC  
TTTTACCAAATCACCAGAAATAGTGCTTCTGTGAATCCACCATCACTCTGCAATCCAAC  
TACTCTTCACTTATTACAAGCATTACTTTGCAGGCATCAAGAAGGTTGCGCTCATTGGGTTTT  
CTGACCACCCCAACAAGGGTGATAGTGCAATCTATGTTGCTGAGAAAAAGCTTTTGGATGCT  
TTGAATATTGAGGTTGTCTACACTGCTCAAGAGGCTGACTACTCTGCTTCTGAGTTGAAG  
TCGATCATCTCTGATATCCCCAGAGATGAGTTCGCACTTGCTTTCCACGGCGGTGGTAACTT  
TGCGGATTTATATCCTGACCATCAGCATTACGTGAACCTGTCGTGCGAGATTTCCCTTCTCT  
CACCACCATATCCTTCCCTCAATCTGTCTGGTATAATGAACAACAACCTTCTCGAACAGGCCTC  
TATTTTGTATGCCGAAAATCCTAATATCACTTTGGTCACTCGTGATAGGCAAAGCTATGGTTTT  
GCCGTTGATGCTTTTGGCAAGCATAATGAAGTTCTTCTTACCCCGATATCGTCTTCTTCATG  
GGCCCCATCCCTGAGATTCGCGAGGCTACTCCCATCACTCATGATGTGTTGATTCTTGCTCG  
TCTCGATCACGAGGGTGGTCAGCAACATGGTGCTGAAGACTATTATCGCGATACTTTGAATG  
CCGCTAACTTGACCTACAGCGTTGAGGATTGGCTCTTGTGGGATCCTCCTGTTGCTCAAAAT  
CCCGATTCTTCTTTGATGATAGAGGCCAAGCTCGTTACGAAGCTGGTGCGGAATTCCTTG  
CCTCTGCTCGCGTCGTCATTACTGATCGTCTCCATGCTCACATCCTTAGCACTTTAATGGGTA  
TTCCTCATATCGTCGTTGAAAACCTCCAAATGGGAAAAATTAATACTATCATAATACCTGGCT  
ACATGGTTGCACATTGGATGGTGTCAGTGTAGTCGTTGATTCCGTTGACAAGGCTTTGTCTT

TGCTTCTCGAGTGAATGAGGCCGGCTACTTTTAAgtcgaccggctgctaacaagccccgaaaggaagctg  
agttggctgctgccaccgctgagcaataactagc**ataacccttggggcctctaaacgggtcttgaggggtttttgctgaaag**

#### DNA Sequence of VsST3 in pJL1 Context:

gaaat**taatac**gact**cactatagg**gagaccacaacggtttccctctagaataattttgtttaactttaagaaggagatatacat**ATGG**  
**AGAAAAAATCTGGAGCCATCCGCAGTTCGAAAAAGGCGGATCCGGAGGAAATGATAATAG**  
CACCACCACCAATAATAACGCCATCGAAATTTATGTTGATCGTGCAACCCTGCCGACCATTCA  
GCAGATGACCAAAATTGTTAGCCAGAAAACCAGCAACAAAAAACTGATTAGCTGGTCACGTT  
ATCCGATCACCGATAAAAGCCTGCTGAAAAAATCAACGCCGAGTTTTTCAAAGAACAGTTT  
GAACTGACCGAGAGCCTGAAAAACATTATTCTGAGCGAAAACATCGATAACCTGATTATTCAT  
GGTAACACCCTGTGGTCAATTGATGTGGTGGATATTATCAAAGAAGTGAACCTGCTGGGTAA  
AAACATTCCGATTGAACTGCACTTTTATGATGATGGCAGCGCAGAATATGTGCGCATTATGA  
ATTTAGCAAACCTGCCGGAAAGCGAACAGAAATACAAAACCAGCCTGAGCAAAAACAACATCA  
AATTTAGCATTGATGGCACCGATAGCTTTAAAAACACCATCGAAAACATTTACGGCTTCAGCC  
AGCTGTATCCGACCACCTACCACATGCTGCGTGCAGATATTTTTGATACCACCCTGAAAATTA  
ACCCGCTGCGTGAACCTGCTGAGCAACAACATTAACAATGAAATGGGACTACTTCAAAGAC  
TTCAACTATAAACAGAAAGACATCTTTTATAGCCTGACCAACTTTAACCCGAAAGAGATCCAA  
GAGGACTTTAACAAAAACAGCAATAAAAACCTTCATCTTCATCGGCAGCAATAGCGCAACCGC  
CACCGCAGAAGAACAATAACATTATTAGCGAAGCCAAAAAAGAAAACAGCAGCATTATTAC  
CAACAGCATCAGCGATTATGACCTGTTCTTTAAAGGTCATCCGAGCGCAACCTTTAATGAGC  
AGATTATTAACGCCACGATATGATCGAGATCAACAACAAAATTCGGTTTGAAGCCCTGATCA  
TGACCGGTATTCTGCCGGATGCAGTTGGTGGTATGGGTAGCAGCGTGTTTTTTAGCATTCCG  
AAAGAGGTGAAAAACAAATTCGTGTTCTATAAAAGCGGCACCGACATTGAAAACAATAGCCT  
GATTCAGGTTATGCTGAAACTGAATCTGATTAACCGCGATAACATCAAACCTGATCAGCGATAT  
TTAAgtcgaccggctgctaacaagccccgaaaggaagctgagttggctgctgccaccgctgagcaataactagc**ataacccttg**  
**gggcctctaaacgggtcttgaggggtttttgctgaaag**

#### DNA Sequence of HpFutA in pJL1 Context:

gaaat**taatac**gact**cactatagg**gagaccacaacggtttccctctagaataattttgtttaactttaagaaggagatatacat**ATGT**  
TCCAACCATTATTAGACGCGTTCATCGAGTCGGCCTCTATCGAGAAGATGGCGTCGAAGTCA  
CCACCCCGCCCTCAAGATCGCCGTGGCCAACCTGGTGGGGAGACGAGGAGATTAAGGA  
ATTTAAGAAGTTTGTGTTTGTACTTCATTTTGTAGTCAACGCTACGCGATCACTTTGCACCAAAA  
CCCTAACGAGTTCTCGGACTTAGTCTTCTCAAACCCTCTTGGCGCGGCCCGCAAGATCTTG  
AGTTACCAAAACACGAAGCGTGTGTTTCTACACAGGCGAGAACGAGTCCCCAAATTTAATTT  
GTTGACTACGCGATCGGCTTTGACGAACTTGACTTCAACGACCGCTACTTGCGCATGCCT  
TTATACTACAATGAGTTACACATCAAGGCAGAACCTCGTGAACGACACTACTGCGCCTTACAA  
GTTGAAGGACAACAGTTTATATGCGCTCAAGAAGCCTAGTCACCACTTCAAGGAGAATCACC  
CTAACCTCTGCGCTGTCGTCAACGACGAGTCGGACCTGCTCAAGCGCGGCTTCGCGTCGT  
TCGTGGCGTCTAACGCGAACGCCCAATGCGCAACGCTTTCTACGACGCACTCAACAGTAT  
CGAGCCTGTGACAGGCGGCGGCAGTGTGCGCAACACTTTAGGCTACAAGGTAGGTAATAA  
GTCGGAGTTCCTCTCGCAATACAAGTTAACTTGTGTTTTGAGAATAGTCAGGGCTACGGCT

ACGTTACGGAGAAGATCCTTGACGCGTACTTTTCACACACTATCCCTATCTACTGGGGCTCC  
CCTTCTGTCGCCAAGGACTTTAACCCTAAAGTCGTTGTCATGTTTCACTTTAATAATTC  
GACGAGGCAATTGATTATATTAAGTATCTCCACACTCACCCCAACGCTTACCTTGACATGTTG  
TACGAGAACCCTCTCAACACCCTCGACGAAAGGCGTACTTTTACCAAGACCTGAGTTTTAA  
GAAGATTTTGGATTTCTTCAAACTATTCTGAAAACGACACTATTTACCATAAGTTCTCCAC  
GAGTTTTATGTGGGAGTACGACTTGCACAAGCCACTCGTCTCAATCGACGACTTGC GCGTT  
AACTACGGTAGTTCGGCATGGTACACCCCAATTTGAGAAGGGAGGAGGGAGTGGAGGA  
GGCAGCGGCGGCAGTGCCTGGTCGCACCCCAATTTGAGAAGTGAgtcgaccggctgctaacaag  
cccgaaaggaagctgagttggctgctgccaccgctgagcaataactagc**ataaccctggggcctctaacgggtcttgaggggtt**  
**ttgctgaaag**

#### DNA Sequence of HpFutC in pJL1 Context:

gaaat**taatacgaactactatagg**gagaccacaacggtttccctctagaataatTTTgtttaactttaagaaggagatatacat**ATGG**  
**AGAAAAAATCTGGAGCCATCCGCAGTTCGAAAAAGGCGGATCCGGAGCCTTTAAAGTTGT**  
TCAGATTTGTGGTGGTCTGGGCAATCAGATGTTTCAGTATGCATTTGCAAAAAGCCTGCAGA  
AACATAGCAATACACCGGTTCTGCTGGATATTACCAGCTTTGATTGGAGCGATCGTAAAATGC  
AGCTGGAAGTGTTCGATTGATCTGCCGTATGCAAGCGCAAAGAAATTGCCATTGCAAAG  
ATGCAGCATCTGCCGAAACTGGTTCGTGATGCACTGAAATGTATGGGTTTTGATCGTGTGAG  
CCAAGAAATCGTGTTTGAATATGAACCGAAACTGCTGAAACCGAGCCGTCTGACCTATTTTT  
TCGGTTATTTTCAAGATCCGCGTTACTTCGATGCAATTAGTCCGCTGATTAACAGACCTTTA  
CACTGCCTCCGCTCCGAAAAATAACAAAAACAATAAGAAAGAAGAGGAATATCAGTGC  
AAGCTGAGCCTGATTCTGGCAGCAAAAAATAGCGTTTTTGTGCATATTCGTCGCGGTGATTA  
TGTTGGTATTGGTTGTCAGCTGGGTATCGACTATCAGAAAAAGCACTGGAATATATGGCAA  
ACGTGTGCCGAATATGGAACCTTTTTGTTTTTGTGAGGACCTGGAATTTACCCAGAATCTGG  
ATCTGGGCTATCCGTTTATGGATATGACCACACGTGATAAAGAAGAAGAGGCCTATTGGGATA  
TGCTGCTGATGCAGAGCTGTCAGCATGGTATTATTGCAAATAGCACCTATAGTTGGTGGGCA  
GCCTATCTGATTGAAAATCCGAAAAAATCATCATCGGTCCGAAACATTGGCTGTTTGGCCA  
TGAAAACATTCTGTGTAAGAATGGGTGAAAATCGAAAGCCACTTTGAAGTAAAAGCCAGA  
AATATAACGCCTAAgtcgaccggctgctaacaagcccgaaaggaagctgagttggctgctgccaccgctgagcaataact  
agc**ataaccctggggcctctaacgggtcttgaggggtttt**gctgaaag

#### DNA Sequence of BtGGTA in pJL1 Context:

gaaat**taatacgaactactatagg**gagaccacaacggtttccctctagaataatTTTgtttaactttaagaaggagatatacat  
**ATGGAGAAAAAATCTCTGCGTGGAGCCATCCGCAGTTCGAAAAAGGATCCGAGTCTAAAC**  
TGAAACTGTCTGACTGGTTTAACCCGTTTAAACGCCCGAAAGTAGTACTATGACCAAATGG  
AAAGCTCCGGTGGTTTGGGAAGGCACCTACAACCGCGCAGTTCTGGACAATTACTATGCAA  
AACAAAAAATCACTGTTGGTCTGACCGTATTTGCCGTTGGCCGTTACATTGAGCATTACCTG  
GAAGAATTCCTGACCAGCGCAAACAAACACTTCATGGTGGGCCACCCTGTTATCTTCTATAT  
TATGGTAGATGATGTTAGCCGTATGCCGCTGATTGAACTGGGCCCGCTGCGTTCCTTCAAAG  
TCTTCAAGATCAAACCGGAAAAACGCTGGCAGGACATCTCCATGATGCGCATGAAAACCAT  
CGGTGAACACATCGTGGCACATATTCAACACGAAGTCGATTTTCTGTTCTGCATGGATGTTG

ATCAGGTTTTCCAGGATAAATTCGGCGTTGAAACCCTGGGTGAGAGCGTGGCACAGCTGCA  
GGCGTGGTGGTACAAGGCGGACCCGAACGATTTACCTATGAACGTCGTAAAGAAAGCGC  
CGCTTACATTCCGTTTGGTGAAGGCGATTTCTATTATCACGCGGCGATTTTTGGCGGTACCC  
CGACCCAAGTTCTGAACATCACCCAGGAATGCTTCAAAGGCATTCTGAAAGACAAAAAAA  
CGATATCGAAGCACAGTGGCATGACGAATCTCACCTGAACAAATATTTCTGCTGAACAAAC  
CGACCAAATTTCTGTCTCCGGAATATTGTTGGGACTATCACATCGGTCTGCCGGCCGACATC  
AACTGGTAAAATGTCTTGGCAGACGAAAGAATATAACGTAGTACGTAACAATGTCTAAgtcg  
accggctgctaacaagccccgaaaggaagctgagttggctgctgccaccgctgagcaataactagc**ataacccttggggcctcta**  
**aacgggtcttgaggggtttttgctgaaag**

#### DNA Sequence of HdGlcNAcT in pJL1 Context:

gaaat**taatacgcactatagg**gagaccacaacggtttccctctagaaatctagataaataaggaggaataaATGACTACC  
CTGGTGTCTGTGCTGATTTGCGCTTACAACGTCGAAAAATATATCGATGAGTGTCTGAACGC  
CGTCATTGCACAGACTTACAAAACCTGGAAATCATTGTTGTAAACGACGGCTCCACGGATG  
GCACTCTGGCTAAACTGCGCCAGTTGAGGCGAAAGATCCACGCGTAAAAATCATTGACAA  
CATTGTAAACCAGGGTACTTCTAAGTCTCTGAATATCGGTATCCAGTACTGTCAGGGCGAAAT  
TATCGCACGTACCGACTCCGATGATATCGTGGACATCCATTGGATTGAAACGCTGATGCGTG  
AGCTGGACAATTTCCCGGAAACTATCGCTATCTCTGCGTACCTGGAATTCCTGGCGGAGAA  
AGGTAACGGTAGCAAACCTGTCGCTCTCGTAAACATGGCAAGAATGCAGAGAACCCGATC  
AGCAGCGAGGCGATCTCCAGCGTATGCTGTTGCGTAATCCGGTTCACAACAACGTCGCAC  
TGGTGCCTCGTAAAGTATTCTCCGAGTACGGTCTGCGTTTTGACCCGGACTATATCCACGCT  
GAAGACTATAAATTCTGGTTCAAGTAAGCAAACCTGGGCAAGATGCGTACTTACCCAAAAGC  
GCTGGTTAAATACCGTCTGCACGCTACCCAGGTTAGCAGCGCATATAACCAGAAACAGCGTT  
CTATTGCAAAAAAATCAAACGTGAGGCCATCTCTCATTACCTGCAGCAGTACGGCATTGAG  
CTGCCGGAAAACTGACTATCCACGACCTGTTCTCTATCTTCTCCCGCAGATTGAACTGAG  
CCTGACCGTTGCGAACAAACAGGAACTGTTCTGGTCTCTGGCAACTTCTCTGTCTGAATATC  
ACTTCCGTGATCTGCTGAAAATCTATTCCCTGGATATCTTCCACCAACTGTCTTCAAATACA  
AAAAGCGCATTTTTCGTAAGTTCTGCTGCCGAACCGCTACCCATCTGTAATCTAAgtcgaccgg  
ctgctaacaagccccgaaaggaagctgagttggctgctgccaccgctgagcaataactagc**ataacccttggggcctctaaacgg**  
**gtcttgaggggtttttgctgaaag**

#### DNA Sequence of NgLgtA in pJL1 Context:

gaaat**taatacgcactatagg**gagaccacaacggtttccctctagaaataatgtttaactttaagaaggagatatacatATGC  
CGAGCGAAGCATTTCGTCGTCATCGTGCATATCGTGAAAACAAACTGCAGCCGCTGGTTAG  
CGTTCTGATTTGTGCATATAATGTGGAAAAATACTTTGCCAGAGCCTGGCAGCAGTTGTTAA  
TCAGACCTGGCGTAATCTGGATATTCTGATTGTTGATGATGGTAGCACCGATGGCACCCCTGG  
CAATTGCACAGCGTTTTCAAGAACAGGATGGTCGTATTCTGATTCTGGCACAGCCTCGTAAT  
AGCGGTCTGATTCCGAGCCTGAATATTGGTCTGGATGAACTGGCAAAAAGCGGTGGTGGTG  
GCGAATATATTGCACGTACCGATGCAGATGATATTGCAGCACCGGATTGGATTGAAAAAATTG  
TGGGTGAGATGGAAAAAGATCGCAGCATTATTGCAATGGGTGCATGGCTGGAAGTTCTGAG  
CGAAGAAAAAGATGGTAATCGTCTGGCACGTCATCATGAACATGGTAAAATTTGGAAAAAC

CGACGCGTCATGAAGATATCGCAGATTTTTTTCCGTTTGGCAACCCGATTCATAACAACACC  
ATGATTATGCGTCGTAGCGTTATTGATGGTGGTCTGCGTTATAATACCGAACGTGATTGGGCA  
GAAGATTATCAGTTTTTGGTATGATGTTAGCAAACCTGGGTCGTCTGGCCTATTATCCGGAAGCA  
CTGGTTAAATATCGCCTGCATGCAAATCAGGTTAGCAGCAAATATAGCATTCCGCCAGCATGAA  
ATTGCCCAGGGTATTCAGAAAACCGCACGTAATGATTTTTCTGCAGAGCATGGGCTTTAAAC  
CCGTTTTGATAGCCTGGAATATCGCCAGATTAAGCAGTTGCCTATGAACTGCTGGAAAAGC  
ATCTGCCGGAAGAAGATTTTGAACGCGCACGTCGTTTTCTGTATCAGTGTTTTAAACGCACC  
GATACTGCCTGCCGGTGCATGGTTAGATTTTGCAGCAGATGGTCGCATGCGTCGTCTGT  
TTACCCTGCGTCAGTATTTTTGGTATTCTGCATCGTCTGCTGAAAACCGTTAAgtcgaccggctgct  
aacaagccccgaaaggaagctgagttggctgctgccaccgctgagcaataactagc**ataacccttggggcctctaaacgggtctt**  
**gaggggtttttgctgaaag**

**DNA Sequence of PdST6 in pJL1 Context:**

gaaat**taatacgaactactatagg**gagaccacaacggttccctctagaataatttgtttaactttaagaaggagatatacat**ATGG**  
**AGAAAAAATCTGGAGCCATCCGCAGTTTCGAAAAAGGCGGATCCGGACTGGTTCCGCGTG**  
GTAGCCACATGTGTAATAGCGATAACACCAGCCTGAAAGAAACCGTTAGCAGCAATAGCGCA  
GATGTTGTTGAAACCGAAACCTATCAGCTGACCCCGATTGATGCACCGAGCAGCTTTCTGA  
GCCATAGCTGGGAACAGACCTGTGGCACCCCGATTCTGAATGAAAGCGATAAACAGGCAAT  
CAGCTTTGATTTTGTTCACCGGAACTGAAACAGGATGAGAAATATTGCTTTACCTTCAAAG  
GCATTACCGGTGATCATCGTTATATTACCAATACCACCCTGACCGTTGTGGCACCGACCCTG  
GAAGTTTATATTGATCATGCAAGCCTGCCGAGCCTGCAGCAGCTGATTCATATTATTCAGGCC  
AAAGATGAATATCCGAGCAATCAGCGTTTTGTTAGCTGGAAACGTGTTACCGTTGATGCAGA  
TAATGCCAACAACTGAACATTCATACCTATCCGCTGAAAGGCAATAATACCAGTCCGGAAAT  
GGTTGCAGCAATTGATGAATATGCACAGAGCAAAAATCGCCTGAACATCGAGTTTTTATACCAA  
TACAGCCCACGTGTTTAATAACCTGCCTCCGATTATTCAGCCGCTGTATAATAACGAGAAAAGT  
GAAATTAGCCACATCAGCCTGTATGATGACGGTAGCAGCGAATATGTTAGCCTGTATCAGT  
GGAAAGATACCCCGAACAAAATTGAAACACTGGAAGGTGAAGTTAGCCTGCTGGCAAATTAT  
CTGGCAGGCACCTCACCGGATGCTCCGAAAGGTATGGGTAATCGTTATAATTGGCACAACT  
GTATGACACCGACTATTACTTTCTGCGCGAAGATTATCTGGATGTTGAAGCAAATCTGCATGA  
TCTGCGTGATTACCTGGGTAGCAGTGCAAAACAAATGCCGTGGGATGAATTTGCAAACTG  
AGCGATAGCCAGCAGACCCTGTTTCTGGATATTGTTGGTTTTTGATAAAGAACAGCTGCAGCA  
ACAGTATAGCCAGAGTCCGCTGCCGAATTTTATCTTTACCGGCACCACCACCTGGGCAGGC  
GGTGAACCAAGAATATTATGCCCAGCAGCAGGTTAACGTGATTAACAATGCAATTAATGAA  
ACCAGCCCGTACTATCTGGGTAAAGATTATGACCTGTTTTTCAAAGGTCATCCTGCCGGTGG  
TGTGATTAATGATATTATTCTGGGTAGCTTCCCGGATATGATTAACATTCCGGCAAAAATTAGC  
TTCGAGGTTCTGATGATGACCGATATGCTGCCGGATACCGTTGCAGGTATTGCAAGCAGTCT  
GTATTTACAATTCGGCAGATAAAGTGAACCTCATTGTTTTTACCAGCAGCGATACCATTAC  
CGATCGTGAAGAAGCACTGAAAAGTCCGCTGGTTTCAGGTTATGCTGACCCTGGGTATTGTT  
AAAGAAAAAGATGTTCTGTTTTGGGCATAAgtcgaccggctgctaacaagccccgaaaggaagctgagttggct  
gctgccaccgctgagcaataactagc**ataacccttggggcctctaaacgggtcttgaggggtttttgctgaaag**



### DNA Sequence of PIST6 in pJL1 Context:

gaaat**taatac****gactcactatagg**gagaccacaacggttccctctagaataattttgtttaactttaagaaggagatatacat**ATGG**  
**AGAAAAAATCTGGAGCCATCCGCAGTTCGAAAAAGGCGGATCCGGAGGATGTAATGATAAT**  
CAGAATACCGTTGATGTTGTTGTGAGCACCGTGAATGATAACGTGATTGAAAATAACACCTAC  
CAGGTGAAACCGATTGATACCCCGACCACCTTTGATAGCTATAGTTGGATTCAGACCTGTGG  
CACCCCGATTCTGAAAGATGATGAGAAATATAGCCTGAGCTTTGATTTTGTTCACCCGGAAC  
TGGATCAGGATGAAAAATTCTGTTTTGAGTTTACCGGTGATGTGGATGGTAAACGTTATGTTA  
CCCAGACCAATCTGACCGTTGTGGCACCGACCCTGGAAGTTTATGTTGATCATGCAAGCCT  
GCCGAGCCTGCAGCAGCTGATGAAAATTATCCAGCAGAAAAACGAGTATAGCCAGAACGAA  
CGTTTTATTAGCTGGGGTCTGATTGGTCTGACCGAAGATAATGCCGAAAAACTGAATGCACA  
TATTTATCCGCTGGCAGGTAATAATACCAGCCAAGAACTGGTTGATGCCGTTATTGATTATGC  
CGATAGCAAAAATCGTCTGAACCTGGAAGTGAATACCAATACCGCACATAGCTTTCCGAATCT  
GGCACCGATTCTGCGTATTATTAGCAGCAAAAGCAATATCCTGATCAGCAACATTAACCTGTA  
TGATGATGGTAGCGCAGAATATGTGAATCTGTATAACTGGAAAGACACCGAGGATAAAAGCG  
TTAAACTGAGCGATAGCTTTCTGGTGCTGAAAGATTATTTCAATGGCATCAGCAGCGAAAAA  
CCGAGCGGTATTTATGGTCGTTATAATTGGCACCGCTGTATAACACCAGCTATTACTTTCTG  
CGCAAAGATTATCTGACAGTTGAACCGCAGCTGCATGATCTGCGTGAATATCTGGGTGGTAG  
CCTGAAACAAATGAGCTGGGATGGTTTTAGCCAGCTGAGCAAAGGTGATAAAGAACTGTTT  
CTGAACATCGTGGGCTTCGATCAAGAAAAACTGCAGCAAGAATATCAGCAGAGCGAACTGC  
CGAATTTTGTTTTTACCGGCACCACCACCTGGGCAGGCGGTGAAACCAAGAATATTATGCA  
CAGCAGCAGGTTAACGTGGTGAATAATGCAATTAATGAAACCAGCCCGTATTATCTGGGTCTG  
TGAACATGACCTGTTTTTCAAAGGTCATCCGCGTGGTGGTATTATCAACGATATTATTCTGGG  
CAGCTTCAACAACATGATTGACATTCCGGCAAAGTCAGCTTTGAAGTTCTGATGATGACCG  
GTATGCTGCCGGATACCGTGGGTGGTATTGCAAGCAGCCTGTATTTTTCAATTCCGGCAGAA  
AAAGTGAGCTTCATTGTGTTTACCAGCAGCGATAACCATTACCGATCGTGAAGATGCACTGAA  
AAGTCCGCTGGTTCAGGTTATGATGACCCTGGGTATTGTGAAAGAAAAAGATGTGCTGTTTT  
GGAGCGATCTGCCGGATTGTAGCAGCGGTGTTTGTATTGCACAGTATTAAGtcgaccggctgctaac  
aaagcccgaaggaagctgagttggctgctgccaccgctgagcaataactag**ataacccttggggccttaacgggtcttgag**  
**gggtttttgctgaaag**

### DNA Sequence of PpST3 in pJL1 Context:

gaaat**taatac****gactcactatagg**gagaccacaacggttccctctagaataattttgtttaactttaagaaggagatatacat**ATGG**  
GAAAAACAAAACCATCGAAGTTTATGTTGATCGTGCAACCCTGCCGACCATTACAGCAGATG  
ACCCAGATTATTAACGAAAACAGCAACAACAAAAAACTGATCAGCTGGTCACGCTATCCGAT  
TAATGATGAAACCCTGCTGGAAGCATTAAACGGCAGCTTTTTCAAATCGTCCGGAACTGA  
TTAAAAGCCTGGATAGCATGATTCTGACCAACGAGATCAAAAAGTGATTATCAATGGCAATA  
CCCTGTGGGCAGTTGATGTTGTGAATATCATTAAAAGCATTGAGGCCCTGGGCAAAAAAACC  
GAAATTGAACTGAACTTCTATGATGATGGCAGCGCAGAATATGTTTCGCCTGTATGATTTTAGC  
CGTCTGCCGAAAGCGAACAAGAATACAAAATTAGCCTGAGCAAAGACAACATTCAGAGCA  
GCATTAATGGCACCCAGCCGTTTGATAATAGCATCGAAAACATTTATGGCTTTAGCCAGCTGT  
ATCCGACCACCTACCACATGCTGCGTGCAGATATCTTTGAAACCAATCTGCCGCTGACCAGC

CTGAAACGTGTTATTAGCAATAATATCAAACAAATGAAATGGGATTACTTCACCACCTTCAATA  
GCCAGCAGAAAAACAAATTCTATAACTTTACCGGCTTTAACCCGGAAAAAATCAAAGAGCAG  
TATAAAGCAAGTCCGCACGAAAACCTTTATCTTTATTGGCACCAATAGCGGCACCGCAACCGC  
AGAACAGCAGATTGATATTCTGACCGAAGCCAAAAACCGGATAGCCCGATTATTACCAATA  
GCATTCAGGGTCTGGACCTGTTTTTCAAAGGTCATCCGAGCGCAACCTATAACCAGCAGATT  
ATTGATGCCATAACATGATCGAGATCTATAACAAAATTCCGTTTGAAGCCCTGATTATGACC  
GATGCACTGCCGGATGCAGTTGGTGGTATGGGTAGCAGCGTGTTTTTTAGCCTGCCGAATA  
CCGTGGAAAACAAATTTATCTTCTACAAAAGCGACACCGACATTGAAAACAATGCACTGATTC  
AGGTGATGATCGAACTGAATATTGTGAATCGCAACGACGTGAAACTGATTAGCGATCTGCAG  
TAAGtcgaccggctgctaacaagcccgaaggaagctgagttggctgctgccaccgctgagcaataactagc**ataaccctgg**  
**ggcctctaacgggtcttgaggggtttttgctgaaag**

#### DNA Sequence of H1HA10 in pJL1 Context:

gaaat**taatacgaactactatagg**gagaccacaacggttccctctagaataatttgtttaactttaagaaggagatatacat  
**ATGGAGAAAAAATCCATCACCATCATCACCATGGTAGCAAAGCGACTACCGGAGGTA****ACT**  
**GGACAACAGCTGGCGGCAAAGGATCCGATACCGTTGATACCGTGCTGGAAAAAATGTTAC**  
CGTTACACATAGCGTGAACCTGCTGGAAGATAGCCATCGTAGCGCAAATAGCAGCCTGCCG  
TATCAGAATACCCATCCGACCACCAATGGTGAAAGCCGAAATATGTTTCGTAGCGCCAAACT  
GCGTATGGTTACCGGTCTGCGTAATGGTAGCGCAGGTAGCGCGACCCAGAATGCAATTAAT  
GGTATTACCAATAAGGTGAACACCGTGATCGAGAAAATGAACATTCAGGATACCGCAACCGG  
CAAAGAATTTAACAAAGATGAAAAGCGCATGGAAAACCTGAACAAAAAAGTGGATGATGGCT  
TTCTGGATATCTGGACCTATAATGCAGAACTGCTGGTGTACTGGAAAACGAACGTACCCTG  
GATGCACATGATAGCCAAGGCACCGGTGGTGGTTATATTCCGGAAGCACCGCGTGATGGTC  
AGGCCTATGTTTCGTAAAGATGGTGAATGGTCTGCTGAGCACCTTTCTGTAAgctgaccggctg  
taacaagcccgaaggaagctgagttggctgctgccaccgctgagcaataactagc**ataaccctggggcctctaacgggtctt**  
**gaggggtttttgctgaaag**

#### DNA Sequence of ApNGT in pMAF10 Context:

ttgctatgccatagcattttatccataagattagcggatcctacct**gacgcttttatcgcaactctactg**tttctccataaccggtttttggg  
ctagcaggagggaattccATGGAAAACGAGAATAAACCGAACGTGGCAAATTTTGAAGCAGCAGTTG  
CAGCCAAAGATTATGAAAAAGCATGTAGCGAGCTGCTGCTGATTCTGAGCCAGCTGGATAG  
CAATTTTGGTGGCATTATGAAATCGAGTTCGAGTACCCAGCTCAGCTGCAGGATCTGGAG  
CAGGAAAAAATTGTGTACTTTTGCACCCGTATGGCGACTGCCATCACCACTGTTCTCTGA  
CCCGGTTCTGGAAATCTCCGACCTGGGTGTGCAGCGTTTCTGGTTTATCAGCGTTGGCTG  
GCGCTGATCTTCGCTAGCAGCCCGTTTCGTGAACGCAGACCACATCCTGCAGACTTACAACC  
GTGAACCGAACCGCAAAAACCTCCCTGGAAATTCACCTGGACTCTAGCAAGTCTCTCTGAT  
TAAATTTTGCATCCTGTACCTGCCGGAATCTAATGTGAACCTGAATCTGGATGTGATGTGGAA  
CATTTCCTCCGGAGCTGTGTGCCTCTCTGTGCTTTGCGCTGCAAAGCCCGCGTTTTGTTGGC  
ACCAGCACCGCCTTTAACAAACGCGCGACCACTCTGCAGTGGTTCCCGCGTCATCTGGACC  
AGCTGAAAAACCTGAACAACATCCCGTCCGCTATCTCTCATGACGTGTATATGCACTGTTCTT  
ACGACACCAGCGTTAACAAAGCACGATGTTAAGCGCGCGCTGAATCACGTGATTCGTCGCCA

CATCGAATCCGAATACGGTTGGAAAGATCGTGATGTGGCTCACATCGGTTATCGCAACAACA  
AACCGGTTATGGTCGTTCTGCTGGAACATTTTCATAGCGCGCACTCTATCTACCGTACTCAC  
TCTACCAGCATGATCGCCGCGCGCAACTTCTATCTGATCGGCCTGGGTTCCCCGAGCG  
TTGACCAGGCCGGTCAGGAGGTTTTCGATGAATTCCACCTGGTAGCGGGTGACAACATGAA  
GCAAAAACCTGGAATTCATTCTGTTCTGTGTGCGAAAGCAATGGTGCGGCAATTTTCTACATGC  
CGAGCATCGGTATGGATATGACCACCATCTTCGCGTCCAATACCCGTCTGGCGCCGATTCA  
GGCAATCGCCCTGGGCCACCCGGCGACTACTACTCCGACTTCATTGAATACGTTATCGTG  
GAAGACGACTACGTGGCTCTGAGGAATGCTTCTCTGAAACCCTGCTGCGTCTGCCGAAA  
GACGCTCTGCCGATGTTCCGTCCGCCCTGGCTCCGGAGAAAGTTGATTACCTGCTGCGTG  
AAAACCCTGAAGTTGTCAACATCGGTATTGCCTCTACCACTATGAAGCTGAACCCGTACTTC  
CTGGAAGCACTGAAGGCCATTTCGTGACCGTGCGAAGGTGAAAGTGCACCTCCACTTCGCA  
CTGGGCCAGTCCAATGGTATCACTCACCTTACGTTGAACGCTTTATCAAATCTTACCTGGG  
CGACAGCGCTACCGCGCACCCGCACTCTCCGTACCACCAGTACCTGCGTATTCTGCACAAC  
TGCGATATGATGGTAAACCCTTTTCCGTTTGGTAATACCAATGGTATTATTGACATGGTAACCC  
TGGGTCTGGTAGGTGTTTGCAAACCGGTGCGGAAGTCCACGAACATATCGATGAAGGCCT  
GTTCAAACGTCTGGGCCTGCCGGAATGGCTGATTGCAAACACCGTGGACGAATACGTGGA  
ACGTGCAGTGCGCCTGGCCGAGAACCATCAGGAACGTCTGGAACCTGCGTCGTTACATTATT  
GAAACAATGGCCTGAACACCCTGTTACCCGCGACCCACGCCCGATGGGTGAGGTGTTT  
CTGGAAAACTGAACGCATTCTGAAGGAAAACGGCGGCGACTACAAGGACGATGACGAC  
AAGGGATAAaagcttggctgtttggcggatgagagaagattttcagcctgatacagattaatcagaac

#### DNA Sequence of NmLgtB.ApNGT in pMAF10 Context:

ttgctatgcatagcattttatccataagattagcggatctacctgacgctttttatcgcaactctactgtttctccataaccggttttttggg  
ctagcaggaggaaattccATGGAAAACGAGAATAAACCGAACGTGGCAAATTTTGAAGCAGCAGTTG  
CAGCCAAAGATTATGAAAAAGCATGTAGCGAGCTGCTGCTGATTCTGAGCCAGCTGGATAG  
CAATTTTGGTGGCATTTCATGAAATCGAGTTCGAGTACCAGCTCAGCTGCAGGATCTGGAG  
CAGGAAAAAATTGTGTACTTTTGCACCCGTATGGCGACTGCCATCACCACCCTGTTCTCTGA  
CCCGGTTCTGGAAATCTCCGACCTGGGTGTGCAGCGTTTCTGGTTTATCAGCGTTGGCTG  
GCGCTGATCTTCGCTAGCAGCCCGTTCGTGAACGCAGACCACATCCTGCAGACTTACAACC  
GTGAACCGAACCGCAAAAACCTCCCTGGAAATTCACCTGGACTCTAGCAAGTCTCTCTGAT  
TAAATTTTGCATCCTGTACCTGCCGGAATCTAATGTGAACCTGAATCTGGATGTGATGTGGAA  
CATTTCCCCGGAGCTGTGTGCCTCTCTGTGCTTTGCGCTGCAAAGCCCGCGTTTTTGTGGC  
ACCAGCACCGCCTTTAACAAACGCGCGACCATTCTGCAGTGGTTCCCGCGTCATCTGGACC  
AGCTGAAAAACCTGAACAACATCCCGTCCGCTATCTCTCATGACGTGTATATGCACTGTTCTT  
ACGACACCAGCGTTAACAAGCACGATGTTAAGCGCGCGCTGAATCACGTGATTCTGTCGCCA  
CATCGAATCCGAATACGGTTGGAAAGATCGTGATGTGGCTCACATCGGTTATCGCAACAACA  
AACCGGTTATGGTCGTTCTGCTGGAACATTTTCATAGCGCGCACTCTATCTACCGTACTCAC  
TCTACCAGCATGATCGCCGCGCGCAACTTCTATCTGATCGGCCTGGGTTCCCCGAGCG  
TTGACCAGGCCGGTCAGGAGGTTTTCGATGAATTCCACCTGGTAGCGGGTGACAACATGAA  
GCAAAAACCTGGAATTCATTCTGTTCTGTGTGCGAAAGCAATGGTGCGGCAATTTTCTACATGC  
CGAGCATCGGTATGGATATGACCACCATCTTCGCGTCCAATACCCGTCTGGCGCCGATTCA

GGCAATCGCCCTGGGCCACCCGGCGACTACTCACTCCGACTTCATTGAATACGTTATCGTG  
GAAGACGACTACGTCGGCTCTGAGGAATGCTTCTCTGAAACCCTGCTGCGTCTGCCGAAA  
GACGCTCTGCCGTATGTTCCGTCCGCCCTGGCTCCGGAGAAAGTTGATTACCTGCTGCGTG  
AAAACCCTGAAGTTGTCAACATCGGTATTGCCTCTACCACTATGAAGCTGAACCCGTA  
CTGGAAGCACTGAAGGCCATTTCGTGACCGTGCGAAGGTGAAAGTGCACCTTCCACTTCGCA  
CTGGGCCAGTCCAATGGTATCACTCACCTTACGTTGAACGCTTTATCAAATCTTACCTGGG  
CGACAGCGCTACCGCGCACCCGCACTCTCCGTACCACCAGTACCTGCGTATTCTGCACAAC  
TGCGATATGATGGTAAACCCTTTTCCGTTTGGTAATACCAATGGTATTATTGACATGGTAACCC  
TGGGTCTGGTAGGTGTTTGCAAACCGGTGCGGAAGTCCACGAACATATCGATGAAGGCCT  
GTTCAAACGTCTGGGCCTGCCGGAATGGCTGATTGCAAACACCGTGGACGAATACGTGGA  
ACGTGCAGTGCGCCTGGCCGAGAACCATCAGGAACGTCTGGAACCTGCGTCGTTACATTATT  
GAAAACAATGGCCTGAACACCCTGTTACCGGCGACCCACGCCCGATGGGTCAGGTGTTT  
CTGGAAAAACTGAACGCATTCTGAAGGAAAACGGCGGCGACTACAAGGACGATGACGAC  
AAGGGATAA ggtaccctcgaggataaggaggataag ATGGAGAAAAAATCTCTGCGTGGAGCCATCC  
GCAGTTCGAAAAGGATCC CAGAACCATGTTATTAGCCTGGCAAGCGCAGCAGAACGTCGT  
GCACATATTGCAGATACCTTTGGTCGTCATGGTATTCCGTTTCAGTTTTTTGATGCACTGATG  
CCGAGCGAACGTCTGGAACAGGCAATGGCAGAACTGGTTCCGGGTCTGAGCGCACATCCG  
TATCTGAGCGGTGTTGAAAAGCATGTTTTATGAGCCATGCAGTTCTGTGGAAACAGGCACT  
GGATGAAGGTCTGCCGTATATTACCGTTTTTGAAGATGATGTTCTGCTGGGTGAAGGTGCAG  
AAAAATTTCTGGCAGAAGATGCCTGGCTGCAAGAACGTTTTTATCCGGATACCGCATTATT  
GTTCTGCTGGAAACCATGTTTATGCATGTTCTGACCAGCCCGAGCGGTGTGGCAGATTATTG  
TGGTCGTGCATTTCCGCTGCTGGAAAGCGAACATTGGGGCACCGCAGGTTATATCATTAGC  
CGTAAAGCAATGCGCTTTTTTCTGGATCGTTTTTGCAGCACTGCCTCCGGAAGGCCTGCATC  
CGGTTGATCTGATGATGTTTAGCGATTTTTTATGATCGTGAAGGTATGCCGTTTTGTCAGCTG  
AATCCGGCACTGTGTGCACAAGAACTGCACTATGCAAATTTTCATGATCAGAATAGCGCACT  
GGGTAGCCTGATTGAACATGATCGTCTGCTGAATCGTAAACAGCAGCGTCGTGATAGTCCG  
GCAAATACCTTTAAACATCGTCTGATTCTGACCCTGACCAAATAGCCGTGAACGTGAAAA  
ACGTCTGACGCTCGCGAACAGTTTATTGTGCCGTTTTCAGTAAaagcttggctgtttggcggatgagag  
aagattttcagcctgatacagattaatcagaac

**DNA Sequence of CjCST-I.NmLgtB.ApNGT in pMAF10 Context:**

ttgctatgccatagcattttatccataagattagcggatcctacctgacgctttttatcgcaactcttactgtttctccataaccggtttttggg  
ctagcaggaggaattcc ATGGAGAAAAAATCTGGAGCCATCCGCGAGTTCGAAAAGGCGGATCCG  
GAGGCAGCCACATGACCCGTACCCGTATGGAAAATGAACTGATTGTGAGCAAAAACATGCA  
GAACATTATCATTGCAGGTAATGGTCCGAGCCTGAAAACATTAATAAACGTCTGCCTCG  
CGAGTATGATGTTTTTCGTTGTAACCAGTTCTATTTTCGAGGATAAATACTATCTGGGCAAAAA  
ATCAAAGCCGTGTTTTTCAATCCGGGTGTTTTTCTGCAGCAGTATCATAACCGCAAAACAGCT  
GATTCTGAAAACGAGTACGAGATCAAAAACATCTTTTGCAGCACCTTTAACCTGCCGTTTAT  
TGAAAGCAACGATTTCTGCACCAGTTTTTACAACCTTTTTCCGGATGCAAACCTGGGCTATG  
AAGTGATTGAAAACCTGAAAGAGTTCTACGCCTATATCAAATACAACGAGATCTATTTCAACA

AACGCATTACCAGCGGTGTTTATATGTGTGCAATTGCCATTGCCCTGGGCTATAAAACCATTT  
ATCTGTGCGGTATCGATTTCTATGAAGGCGACGTTATTTATCCGTTTGAAGCAATGAGCACCA  
ACATTAACAATCTTCCCTGGCATCAAAGACTTCAAACCGAGCAATTGTCACAGCAAAGAA  
TATGATATTGAGGCCCTGAAACTGCTGAAAAGCATCTATAAAGTGAACATCTATGCCCTGTGT  
GATGATAGCATTCTGGCAAATCATTTTCCGCTGAGCATTAAACATCAACAACAACCTTTACCCTG  
GAAAACAACACAACAACAGCATCAATGATATCCTGCTGACCGATAATACACCGGGTGTAG  
CTTTTACAAAATCAGCTGAAAGCCGATAACAAAATTATGCTGAACTTTTATTA~~Aggtaccctcgag~~  
~~gataaggaggataag~~ATGGAGAAAAAATCTCTGCGTGGAGCCATCCGCAGTTCGAAAAAGGATC  
CCAGAACCATGTTATTAGCCTGGCAAGCGCAGCAGAACGTCGTGCACATATTGCAGATACCT  
TTGGTCGTCATGGTATTCCGTTTTAGTTTTTGGTGCATGACTGATGCCGAGCGAACGTCTGGAA  
CAGGCAATGGCAGAACTGGTTCGGGTCTGAGCGCACATCCGTATCTGAGCGGTGTTGAA  
AAAGCATGTTTTATGAGCCATGCAGTTCTGTGGAAACAGGCACTGGATGAAGGTCTGCCGT  
ATATTACCGTTTTTGAAGATGATGTTCTGCTGGGTGAAGGTGCAGAAAAATTTCTGGCAGAA  
GATGCCTGGCTGCAAGAACGTTTTGATCCGGATACCGCATTATTGTTTCGTCTGGAAACCAT  
GTTTATGCATGTTCTGACCAGCCCGAGCGGTGTGGCAGATTATTGTGGTCGTGCATTTCCG  
CTGCTGGAAAGCGAACATTGGGGCACCGCAGGTTATATCATTAGCCGTAAAGCAATGCGCT  
TTTTTCTGGATCGTTTTGCAGCACTGCCTCCGGAAGGCCTGCATCCGTTGATCTGATGATG  
TTTAGCGATTTTTTGGATCGTGAAGGTATGCCGGTTTTGTCAGCTGAATCCGGCACTGTGTGC  
ACAAGAACTGCACTATGCAAATTTTATGATCAGAATAGCGCACTGGGTAGCCTGATTGAAC  
ATGATCGTCTGCTGAATCGTAAACAGCAGCGTCGTGATAGTCCGGCAAATACCTTTAAACAT  
CGTCTGATTCTGCTGCCCTGACCAAATTAGCCGTGAACGTGAAAAACGTGTCAGCGTCGCG  
AACAGTTTATTGTGCCGTTTTCAGTAA~~tgaaggctagaggaggtaaaa~~ATGGAAAACGAGAATAAACC  
GAACGTGGCAAATTTTGAAGCAGCAGTTGCAGCCAAAGATTATGAAAAAGCATGTAGCGAG  
CTGCTGCTGATTCTGAGCCAGCTGGATAGCAATTTTGGTGGCATTTCATGAAATCGAGTTCGA  
GTACCCAGCTCAGCTGCAGGATCTGGAGCAGGAAAAAATTGTGTACTTTTGCACCCGTATG  
GCGACTGCCATCACACCCTGTTCTCTGACCCGGTTCTGGAAATCTCCGACCTGGGTGTG  
CAGCGTTTCTGGTTTATCAGCGTTGGCTGGCGCTGATCTTCGCTAGCAGCCCGTTCGTGA  
ACGCAGACCACATCCTGCAGACTTACAACCGTGAACCGAACCGCAAAAACTCCCTGGAAAT  
TCACCTGGACTCTAGCAAGTCCTCTCTGATTAATTTTGCATCCTGTACCTGCCGGAATCTAA  
TGTGAACCTGAATCTGGATGTGATGTGGAACATTTCCCGGAGCTGTGTGCCTCTCTGTGC  
TTTGGCGCTGCAAAGCCCGCGTTTTTGTGGCACCAGCACCGCCTTTAACAACGCGCGACC  
ATTCTGCAGTGGTTCCCGCGTCATCTGGACCAGCTGAAAAACCTGAACAACATCCCGTCCG  
CTATCTCTCATGACGTGTATATGCACTGTTCTTACGACACCAGCGTTAACAAGCACGATGTTA  
AGCGCGCGCTGAATCACGTGATTCGTGCGCCACATCGAATCCGAATACGGTTGGAAAGATCG  
TGATGTGGCTCACATCGGTTATCGCAACAACAACCGGTTATGGTCGTTCTGCTGGAACATT  
TTCATAGCGCGCACTCTATCTACCGTACTCACTCTACCAGCATGATCGCCGCGCGCGAACAC  
TTCTATCTGATCGGCCTGGGTTCCCGAGCGTTGACCAGGCCGGTCAGGAGGTTTTTCGATG  
AATTCCACCTGGTAGCGGGTGACAACATGAAGCAAAAACTGGAATTCATTTCGTTCTGTGTGC  
GAAAGCAATGGTGCGGCAATTTTCTACATGCCGAGCATCGGTATGGATATGACCACCATCTT  
CGCGTCCAATACCCGTCTGGCGCCGATTCAGGCAATCGCCCTGGGCCACCCGGCGACTAC  
TCACTCCGACTTCATTGAATACGTTATCGTGGAAAGACGACTACGTCGGCTCTGAGGAATGCT

TCTCTGAAACCCTGCTGCGTCTGCCGAAAGACGCTCTGCCGTATGTTCCGTCCGCCCTGG  
CTCCGGAGAAAGTTGATTACCTGCTGCGTGAAAACCCTGAAGTTGTCAACATCGGTATTGC  
CTCTACCACTATGAAGCTGAACCCGTACTTCCTGGAAGCACTGAAGGCCATTTCGTGACCGT  
GCGAAGGTGAAAGTGCACCTCCACTTCGCACTGGGCCAGTCCAATGGTATCACTCACCTT  
ACGTTGAACGCTTTATCAAATCTTACCTGGGCGACAGCGCTACCGCGCACCCGCACTCTCC  
GTACCACCAGTACCTGCGTATTCTGCACAACTGCGATATGATGGTAAACCCTTTTCCGTTTG  
GTAATACCAATGGTATTATTGACATGGTAACCCTGGGTCTGGTAGGTGTTTGCAAACCGGT  
GCGGAAGTCCACGAACATATCGATGAAGGCCTGTTCAAACGTCTGGGCCTGCCGGAATGG  
CTGATTGCAAACACCGTGGACGAATACGTGGAACGTGCAGTGCGCCTGGCCGAGAACCAT  
CAGGAACGTCTGGAACCTGCGTTCGTTACATTATTGAAAACAATGGCCTGAACACCCTGTTTAC  
CGGCGACCCACGCCCGATGGGTCAGGTGTTTCTGGAAAACTGAACGCATTCTGAAGGA  
AAACggcggcGACTACAAGGACGATGACGACAAGGGATAAaagcttggctgtttggcggatgagagaagatt  
tcagcctgatacagattaatcagaac

**DNA Sequence of PdST6.NmLgtB.ApNGT in pMAF10 Context:**

ttgctatgccatagcattttatccataagattagcggatcctacctgacgctttttatcgcaactctactgtttctccatacccgtttttggg  
ctagcaggaggaaattccATGGAGAAAAAATCTGGAGCCATCCGCAGTTCGAAAAAGGCGGATCCG  
GACTGGTTCCGCGTGGTAGCCACATGTGTAATAGCGATAACACCAGCCTGAAAGAAACCGT  
TAGCAGCAATAGCGCAGATGTTGTTGAAACCGAAACCTATCAGCTGACCCCGATTGATGCAC  
CGAGCAGCTTTCTGAGCCATAGCTGGGAACAGACCTGTGGCACCCCGATTCTGAATGAAAG  
CGATAAACAGGCAATCAGCTTTGATTTTGTTCACCCGGAACCTGAAACAGGATGAGAAATATT  
GCTTTACCTTCAAAGGCATTACCGGTGATCATCGTTATATTACCAATACCACCCTGACCGTTG  
TGGCACCGACCCTGGAAGTTTATATTGATCATGCAAGCCTGCCGAGCCTGCAGCAGCTGAT  
TCATATTATTCAGGCCAAAGATGAATATCCGAGCAATCAGCGTTTTGTTAGCTGGAAACGTGT  
TACCGTTGATGCAGATAATGCCAACAACTGAACATTCATACCTATCCGCTGAAAGGCAATAA  
TACCAGTCCGGAAATGGTTGCAGCAATTGATGAATATGCACAGAGCAAAAATCGCCTGAACA  
TCGAGTTTTATACCAATACAGCCCACGTGTTAATAACCTGCCTCCGATTATTCAGCCGCTGT  
ATAATAACGAGAAAGTAAAATTAGCCACATCAGCCTGTATGATGACGGTAGCAGCGAATATG  
TTAGCCTGTATCAGTGGAAAGATACCCCGAACAAAATTGAAACACTGGAAGGTGAAGTTAGC  
CTGCTGGCAAATTATCTGGCAGGCACCTCACCGGATGCTCCGAAAGGTATGGGTAATCGTT  
ATAATTGGCACAACTGTATGACACCGACTATTACTTTCTGCGCGAAGATTATCTGGATGTTG  
AAGCAAATCTGCATGATCTGCGTGATTACCTGGGTAGCAGTGCAAAACAAATGCCGTGGGAT  
GAATTTGCAAACTGAGCGATAGCCAGCAGACCCTGTTTCTGGATATTGTTGGTTTTGATAAA  
GAACAGCTGCAGCAACAGTATAGCCAGAGTCCGCTGCCGAATTTTATCTTTACCGGCACCA  
CCACCTGGGCAGGCGGTGAAACCAAAGAATATTATGCCAGCAGCAGGTTAACGTGATTAA  
CAATGCAATTAATGAAACCAGCCCGTACTATCTGGGTAAAGATTATGACCTGTTTTTCAAAGG  
TCATCCTGCCGGTGGTGTGATTAATGATATTATTCTGGGTAGCTTCCCGGATATGATTAACATT  
CCGGCAAAAATTAGCTTCGAGGTTCTGATGATGACCGATATGCTGCCGGATACCGTTGCAG  
GTATTGCAAGCAGTCTGTATTTACAATTCCGGCAGATAAAGTGAACCTCATTGTTTTTACCA  
GCAGCGATACCATTACCGATCGTGAAGAAGCACTGAAAAGTCCGCTGGTTCAGGTTATGCT  
GACCCTGGGTATTGTTAAAGAAAAAGATGTTCTGTTTTGGGCATAAaggtaccctcaggataaggagg

ataagATGGAGAAAAAATCTCTGCGTGGAGCCATCCGCAGTTCGAAAAAGGATCCCAGAAC  
CATGTTATTAGCCTGGCAAGCGCAGCAGAACGTCGTGCACATATTGCAGATACCTTTGGTCCG  
TCATGGTATTCCGTTTCAGTTTTTTGATGCACTGATGCCGAGCGAACGTCTGGAACAGGCCAA  
TGGCAGAACTGGTCCGGGTCTGAGCGCACATCCGTATCTGAGCGGTGTTGAAAAAGCATG  
TTTTATGAGCCATGCAGTTCTGTGAAACAGGCACTGGATGAAGGTCTGCCGTATATTACCG  
TTTTTGAAGATGATGTTCTGCTGGGTGAAGGTGCAGAAAAATTTCTGGCAGAAGATGCCTG  
GCTGCAAGAACGTTTTGATCCGGATACCGCATTATTGTTTCGTCTGGAAACCATGTTTATGCA  
TGTTCTGACCAGCCCGAGCGGTGTGGCAGATTATTGTGGTTCGTGCATTTCCGCTGCTGGAA  
AGCGAACATTGGGGCACCGCAGGTTATATCATTAGCCGTAAAGCAATGCGCTTTTTTCTGGA  
TCGTTTTGCAGCACTGCCTCCGGAAGGCCTGCATCCGTTGATCTGATGATGTTTAGCGATT  
TTTTTGATCGTGAAGGTATGCCGGTTTGTGAGCTGAATCCGGCACTGTGTGCACAAGAACT  
GCACTATGCAAAATTTTCATGATCAGAATAGCGCACTGGGTAGCCTGATTGAACATGATCGTCT  
GCTGAATCGTAAACAGCAGCGTCGTGATAGTCCGGCAAATACCTTTAAACATCGTCTGATTC  
GTGCCCTGACCAAATAGCCGTGAACGTGAAAAACGTGTCAGCGTCGCGAACAGTTTTAT  
TGTGCCGTTTTCAGTAAAtgaaggtctagaggaggtaaaaATGGAAAACGAGAATAAACCGAACGTGGC  
AAATTTTGAAGCAGCAGTTGCAGCCAAAGATTATGAAAAAGCATGTAGCGAGCTGCTGCTGA  
TTCTGAGCCAGCTGGATAGCAATTTTGGTGGCATTTCATGAAATCGAGTTCGAGTACCCAGCT  
CAGCTGCAGGATCTGGAGCAGGAAAAAATTGTGTACTTTTGCACCCGTATGGCGACTGCCA  
TCACCACCCTGTTCTCTGACCCGGTTCTGGAAATCTCCGACCTGGGTGTGCAGCGTTTCCT  
GGTTTATCAGCGTTGGCTGGCGCTGATCTTCGCTAGCAGCCCGTTTCGTGAACGCAGACCAC  
ATCCTGCAGACTTACAACCGTGAACCGAACCGCAAAAACCTCCCTGGAAATTCACCTGGACT  
CTAGCAAGTCCTCTCTGATTAATTTTGCATCCTGTACCTGCCGGAATCTAATGTGAACCTGA  
ATCTGGATGTGATGTGGAACATTTCCCGGAGCTGTGTGCCTCTCTGTGCTTTGCGCTGCA  
AAGCCCGCGTTTTTGTGGCACCAGCACCGCCTTTAACAAACGCGCGACCATTCTGCAGTG  
GTTCCCGCGTCATCTGGACCAGCTGAAAAACCTGAACAACATCCCGTCCGCTATCTCTCAT  
GACGTGTATATGCACTGTTCTTACGACACCAGCGTTAACAAAGCACGATGTTAAGCGCGCGCT  
GAATCACGTGATTCGTGCCACATCGAATCCGAATACGGTTGGAAAGATCGTGATGTGGCT  
CACATCGGTTATCGCAACAACAACCGGTTATGGTCGTTCTGCTGGAACATTTTCATAGCGC  
GCACTCTATCTACCGTACTCACTCTACCAGCATGATCGCCGCGCGCAACACTTCTATCTGA  
TCGGCCTGGGTTCCCGAGCGTTGACCAGGCCGGTCAAGGAGTTTTTCGATGAATTCCACC  
TGGTAGCGGGTGACAACATGAAGCAAAAACCTGGAATTCATTTCGTTCTGTGTGCGAAAGCAA  
TGGTGCGGCAATTTTCTACATGCCGAGCATCGGTATGGATATGACCACCATCTTCGCGTCCA  
ATACCCGTCTGGCGCCGATTCAGGCAATCGCCCTGGGCCACCCGGCGACTACTCACTCCG  
ACTTCATTGAATACGTTATCGTGGAAGACGACTACGTCGGCTCTGAGGAATGCTTCTCTGAA  
ACCCTGCTGCGTCTGCCGAAAGACGCTCTGCCGTATGTTCCGTCCGCCCTGGCTCCGGAG  
AAAGTTGATTACCTGCTGCGTGAAAACCCTGAAGTTGTCAACATCGGTATTGCCTCTACCAC  
TATGAAGCTGAACCCGTAATCCTGGAAGCACTGAAGGCCATTTCGTGACCGTGCGAAGGTG  
AAAGTGCACCTCCACTTCGCACTGGGCCAGTCCAATGGTATCACTCACCTTACGTTGAAC  
GCTTTATCAAATCTTACCTGGGCGACAGCGCTACCGCGCACCCGCACTCTCCGTACCACCA  
GTACCTGCGTATTCTGCACAACCTGCGATATGATGGTAAACCCTTTTCCGTTTGGTAATACCAA  
TGGTATTATTGACATGGTAACCCTGGGTCTGGTAGGTGTTTGCAAAACCGGTGCGGAAGTC

CACGAACATATCGATGAAGGCCTGTTCAAACGTCTGGGCCTGCCGGAATGGCTGATTGCAA  
ACACCGTGGACGAATACGTGGAACGTGCAGTGCGCCTGGCCGAGAACCATCAGGAACGTC  
TGGAAGTGCCTCGTTACATTATTGAAAACAATGGCCTGAACACCCTGTTACCCGGCGACCC  
ACGCCCGATGGGTGAGGTGTTCTGGA AAAACTGAACGCATTCTGAAGGAAAACGGCGG  
CGACTACAAGGACGATGACGACAAGGGATAAaagcttggctgtttggcggatgagagaagatttcagcctgata  
cagattaaatcagaac

#### DNA sequence of pCon.ConNeuA:

gatgcatttgacggctagctcagtccttaggtacagtgctagcgaattcgagctcccgggaggaggaacgATGAGAACAAAA  
TTATTGCGATAATTCCAGCCCGTAGTGGATCTAAAGGGTTGAGAAATAAAAATGCTTTGATGC  
TGATAGATAAACCTCTTCTTGCTTATAACAATTGAAGCTGCCTTGCAGTCAGAAATGTTTGAGA  
AAGTAATTGTGACAACCTGACTCCGAACAGTATGGAGCAATAGCAGAGTCATATGGTGCTGAT  
TTTTTGCTGAGACCGGAAGAAGACTAGCAACTGATAAAGCATCATCATTTGAATTTATAAACAT  
GCGTTAAGTATATACTGATTATGAGAAGCTTTGCTTTATTACAACCAACTTCACCCTTTAGAG  
ATTCGACCCATATTATTGAGGCTGTAAAGTTATATCAAACCTTTAGAAAAATACCAATGTGTTGT  
TTCTGTTACTAGAAGCAATAAGCCATCACAATAATTAGACCATTAGATGATTACTCGACACTG  
TCTTTTTTTGACCTTGATTATAGTAAATATAATCGAAACTCAATAGTAGAATATCATCCGAATGG  
AGCTATATTTATAGCTAATAAGCAGCATTATCTTCATACAAAGCATTTTTTTTGGTCGCTATTAC  
TAGCTTATATTATGGATAAGGAAAGCTCTTTAGATATAGATGATAGAATGGATTTTCGAACTTGC  
AATTACCATTTCAGCAAAAAAAAAAATAGACAAAAAATACTTTATCAAACATAACATAATAGAATCA  
ATGAGAAACGAAATGAATTTGATAGTGTAAGTGATATAACTTTAATTGGACACTCGCTGTTTGA  
TTATTGGGACGTAAAAAAAAATAAATGATATAGAAGTTAATAACTTAGGTATCGCTGGTATAAACT  
CGAAGGAGTACTATGAATATATTATTGAGAAAGAGCGGATTGTTAATTTTCGGAGAGTTTGTTTT  
CATCTTTTTTTGGAAGTAAATGATATAGTTGTTAGTGATTGGAAAAAGAAGACACATTGTGGTAT  
TTGAAGAAAACATGCCAGTATATAAAGAAGAAAAATGCTGCATCAAAAATTTATTTATTGTCGG  
TTCCTCTGTTTTTTGGGCGTATTGATCGAGATAATAGAATAATTAATGATTTAAATCCTTATCTT  
CGAGAGAATGTAGATTTTTCGGAAGTTTATTAGCTTGGATCACGTTTTTAAAGACTCTTATGGC  
AATCTAAATAAAATGTATACTTATGATGGCTTACATTTTAATAGTAATGGGTATACAGTATTAGAA  
AACGAAATAGCGGAGATTGTTAAATGActtaattaatctagagtcgacctgcagcatgcaagctggctgtttggcg  
gatgagagaagatttcagcctgatacagattaaatcagaacgcagaagcggctgataaacagaatttgcctggcggcagtagcg  
cgggtgtcccacctgacccatgccgaactcagaagtgaacgccgtagcgcgtaggtagtgtgggtctcccatgagagta  
gggaactgccaggcatcaataaaacgaaaggctcagtcgaaagactggcctttcgttttatctgtgtttgctcggtagcagcctcctg  
agtaggacaaat

#### Sequence of pBR322.Fc-6 in Context:

gaaatgagctgttgacaattaatcatccggctcgtataatgtgtggaattgtgagcggataacaattcacacaggaaacagacc  
ATGGAACCGAAAAGCTGTGATAAAACCCATACCTGTCCGCCTTGCCGGCACCGGAACTGC  
TGGGTGGTCCGAGCGTTTTTCTGTTTCCGCCTAAACCGAAAGATACCCTGATGATTAGCCGT  
ACACCGGAAGTTACCTGTGTTGTTGTTGATGTTAGCCATGAAGATCCGGAAGTGAAATTTAA  
CTGGTATGTTGATGGTGTGGAAGTGCATAATGCAAAAACCAAACCGCGTGAAGAAGCGACT  
ACCGGAGGTAACTGGACAACAGCGGGAGGACGTGTTGTTAGCGTTCTGACCGTTCTGCAT



CAGGATTGGCTGAATGGTAAAGAATACAAATGCAAAGTGAGCAACAAAGCACTGCCTGCAC  
CGATTGAAAAACCATTAGCAAAGCAAAAGGTCAGCCTCGTGAACCGCAGGTTTATACCCTG  
CCTCCGAGCCGTGATGAACTGACCAAAAATCAGGTTAGCCTGACCTGTCTGGTGAAAGGTT  
TTTATCCGAGCGATATTGCAGTTGAATGGGAAAGCAATGGTCAGCCGGAAATAACTATAAAA  
CCACCCCTCCGGTTCTGGATAGTGATGGTAGCTTTTTTCTGTATAGCAAACCTGACCGTTGAT  
AAAAGCCGTTGGCAGCAGGGTAATGTTTTAGCTGTAGCGTTATGCATGAAGCCCTGCATAA  
TCATTATACCCAGAAAAGCCTGAGCCTGAGTCCGGGTAAAGGTAGCCATCATCATCACCATC  
ATTAAagcttgctgtttggcggatgagagaagatttcagcctgatacagattaatcagaacgcagaagcggctgataaac  
agaatttgctggcggcagtagcgcggtgtcccacctgacccatgccgaactcagaagtgaacgccgtagcgccgatgtagt  
gtgggtctcccatgagagtagggaactgccaggcatcaataaaacgaaaggctcagtcgaaagactgggcctttcgtttatc  
tgtgtttgctggtgaacgctctcctgagtaggacaaat

**Sequence of pBR322.Im7-6 in Context:**

gaaatgagctgttgacaattaatcatccggctcgtataatgtgtggaattgtgagcggataacaatttcacacaggaacagacc  
ATGGAAGCTGGAAAATAGTATTAGTGATTACACAGAGGCTGAGTTTGTTCAACTTCTTAAGGAA  
ATTGAAAAAGAGGCGACTACCGGAGGTAAGTGGACAACAGCGGGAGGAGATGTGTTAGAT  
GTGTTACTCGAACACTTTGTAAAAATTACTGAGCATCCAGATGGAACGGATCTGATCTATTAT  
CCTAGTGATAATAGAGACGATAGCCCCGAAGGGATTGTCAAGGAAATTAAGAATGGCGAGC  
TGCTAACGGTAAGCCAGGATTTAAACAGGGCGGATCCCATCACCATCATCACCATTAAagctt  
ggctgtttggcggatgagagaagatttcagcctgatacagattaatcagaacgcagaagcggctgataaacagaaattgcctg  
gcggcagtagcgcggtgtcccacctgacccatgccgaactcagaagtgaacgccgtagcgccgatgtagtgggggtctccc  
catgagagtagggaactgccaggcatcaataaaacgaaaggctcagtcgaaagactgggcctttcgtttatcgtgtgtgtcgg  
gaacgctctcctgagtaggacaaat

## Supplementary Information References

1. Martin, R.W. et al. Cell-free protein synthesis from genomically recoded bacteria enables multisite incorporation of noncanonical amino acids. *Nature Communications* **9**, 1203 (2018).
2. Bundy, B.C. & Swartz, J.R. Site-Specific Incorporation of p-Propargyloxyphenylalanine in a Cell-Free Environment for Direct Protein-Protein Click Conjugation. *Bioconjugate Chemistry* **21**, 255-263 (2010).
3. Kightlinger, W. et al. Design of glycosylation sites by rapid synthesis and analysis of glycosyltransferases. *Nature Chemical Biology* **14**, 627-635 (2018).
4. Ollis, A.A., Zhang, S., Fisher, A.C. & DeLisa, M.P. Engineered oligosaccharyltransferases with greatly relaxed acceptor-site specificity. *Nature Chemical Biology* **10**, 816-822 (2014).
5. Glasscock, C.J. et al. A flow cytometric approach to engineering *Escherichia coli* for improved eukaryotic protein glycosylation. *Metabolic Engineering* **47**, 488-495 (2018).
6. Valentine, Jenny L. et al. Immunization with Outer Membrane Vesicles Displaying Designer Glycotopes Yields Class-Switched, Glycan-Specific Antibodies. *Cell Chemical Biology* **23**, 655-665 (2016).
7. Naegeli, A. et al. Substrate Specificity of Cytoplasmic N-Glycosyltransferase. *Journal of Biological Chemistry* **289**, 24521-24532 (2014).
8. Schwarz, F., Fan, Y.-Y., Schubert, M. & Aebi, M. Cytoplasmic N-Glycosyltransferase of *Actinobacillus pleuropneumoniae* Is an Inverting Enzyme and Recognizes the NX(S/T) Consensus Sequence. *Journal of Biological Chemistry* **286**, 35267-35274 (2011).
9. Park, J.E., Lee, K.Y., Do, S.I. & Lee, S.S. Expression and characterization of beta-1,4-galactosyltransferase from *Neisseria meningitidis* and *Neisseria gonorrhoeae*. *Journal of Biochemistry and Molecular Biology* **35**, 330-336 (2002).
10. Peng, W. et al. *Helicobacter pylori*  $\beta$ 1,3-N-acetylglucosaminyltransferase for versatile synthesis of type 1 and type 2 poly-LacNAcs on N-linked, O-linked and I-antigen glycans. *Glycobiology* **22**, 1453-1464 (2012).
11. Ramakrishnan, B. & Qasba, P.K. Crystal structure of lactose synthase reveals a large conformational change in its catalytic component, the beta1,4-galactosyltransferase-I. *Journal of Molecular Biology* **310**, 205-218 (2001).
12. Aanensen, D.M., Mavroidi, A., Bentley, S.D., Reeves, P.R. & Spratt, B.G. Predicted Functions and Linkage Specificities of the Products of the *Streptococcus pneumoniae* Capsular Biosynthetic Loci. *Journal of Bacteriology* **189**, 7856-7876 (2007).
13. Ban, L. et al. Discovery of glycosyltransferases using carbohydrate arrays and mass spectrometry. *Nature Chemical Biology* **8**, 769-773 (2012).

14. Blixt, O., van Die, I., Norberg, T. & van den Eijnden, D.H. High-level expression of the *Neisseria meningitidis* lgtA gene in *Escherichia coli* and characterization of the encoded N-acetylglucosaminyltransferase as a useful catalyst in the synthesis of GlcNAc $\beta$ 1 $\rightarrow$ 3Gal and GalNAc $\beta$ 1 $\rightarrow$ 3Gal linkages. *Glycobiology* **9**, 1061-1071 (1999).
15. Higuchi, Y. et al. A rationally engineered yeast pyruvyltransferase Pvg1p introduces sialylation-like properties in neo-human-type complex oligosaccharide. *Scientific Reports* **6**, 26349 (2016).
16. Sun, S., Scheffler, N.K., Gibson, B.W., Wang, J. & Munson Jr., R.S. Identification and Characterization of the N-Acetylglucosamine Glycosyltransferase Gene of *Haemophilus ducreyi*. *Infection and Immunity* **70**, 5887-5892 (2002).
17. Wang, G., Ge, Z., Rasko, D.A. & Taylor, D.E. Lewis antigens in *Helicobacter pylori*: biosynthesis and phase variation. *Molecular Microbiology* **36**, 1187-1196 (2000).
18. Persson, K. et al. Crystal structure of the retaining galactosyltransferase LgtC from *Neisseria meningitidis* in complex with donor and acceptor sugar analogs. *Nature Structural Biology* **8**, 166 (2001).
19. Fang, J. et al. Highly Efficient Chemoenzymatic Synthesis of  $\alpha$ -Galactosyl Epitopes with a Recombinant  $\alpha$ (1 $\rightarrow$ 3)-Galactosyltransferase. *Journal of the American Chemical Society* **120**, 6635-6638 (1998).
20. Hidari, K.I. et al. Purification and characterization of a soluble recombinant human ST6Gal I functionally expressed in *Escherichia coli*. *Glycoconjugate Journal* **22**, 1-11 (2005).
21. Yamamoto, T. Marine Bacterial Sialyltransferases. *Marine Drugs* **8**, 2781 (2010).
22. Chiu, C.P.C. et al. Structural Analysis of the  $\alpha$ -2,3-Sialyltransferase Cst-I from *Campylobacter jejuni* in Apo and Substrate-Analogue Bound Forms. *Biochemistry* **46**, 7196-7204 (2007).
23. Keys, T.G. et al. A biosynthetic route for polysialylating proteins in *Escherichia coli*. *Metabolic Engineering* **44**, 293-301 (2017).
24. Kim, D.M. & Swartz, J.R. Efficient production of a bioactive, multiple disulfide-bonded protein using modified extracts of *Escherichia coli*. *Biotechnology and Bioengineering* **85**, 122-129 (2004).
